# Supplementary material
Source: PubMed Central journal article supplement (PMC6439616)

## Supplementary Online Content

Wildes T, Mickle AM, Ben Abdallah A. Effect of electroencephalography-guided anesthetic administration on postoperative delirium among older adults undergoing major surgery [published February 2, 2019]. *JAMA*. doi:10.1001/jama.2018.22005

Supplement 3. List of investigators and committees in the ENGAGES Trial

eTable 1. Patient Sociodemographic Characteristics

eTable 2. Pre-Operative Health Conditions: Comorbidities

eTable 3. Patient Sociodemographic Characteristics and Pre-Operative Health Conditions by 30-16 day follow-up Response

eTable 4. Laboratory Values

eTable 5. Surgery Information

eTable 6. Intraoperative Drug Administration

eTable 7. Intraoperative Mean Arterial Pressure (MAP) and Heart Rate

eTable 8. Number of Delirium Assessments Completed

eTable 9. Reasons CAM or CAM-ICU Assessments Were Not Conducted

eTable 10. Logistic Regression and Covariate Adjustment for Delirium

eTable 11. Sensitivity Analysis – Treating Patients with Missing Assessments as All Positive or 25 All Negative

eTable 12. Sensitivity Analysis – Switching Patients Between Groups per Actual Treatment Received (Per Protocol Analysis)

eTable 13. Frequency of All Serious Adverse Events by Body System and Preferred Term

eTable 14. Causes of Death up to 30 Days After Surgery

eFigure1. ENGAGES Study Electroencephalography (EEG) Guided Protocol Quick Reference 31 Guide

eFigure2. Real-Time Clinician Feedback.

eFigure3. Anesthesia Fidelity Checklist

eFigure4. Kaplan-Meier Curve: 30 Day Survival

eFigure5. Kaplan-Meier Curve: Cumulative Incidence of Delirium

eFigure6. Delirium Incidence by Comorbidity

This supplementary material has been provided by the authors to give readers additional information about their work.

|                                                                                                                               |    |
|-------------------------------------------------------------------------------------------------------------------------------|----|
| List of investigators and committees in the ENGAGES Trial.....                                                                | 4  |
| eTable1: Patient Sociodemographic Characteristics .....                                                                       | 5  |
| eTable2: Pre-Operative Health Conditions: Comorbidities .....                                                                 | 6  |
| eTable3: Patient Sociodemographic Characteristics and Pre-Operative Health Conditions by 30-day follow-up Response.....       | 7  |
| eTable4: Laboratory Values .....                                                                                              | 9  |
| eTable5: Surgery Information.....                                                                                             | 10 |
| eTable6: Intraoperative Drug Administration .....                                                                             | 11 |
| eTable7: Intraoperative Mean Arterial Pressure (MAP) and Heart Rate .....                                                     | 12 |
| eTable8: Number of Delirium Assessments Completed .....                                                                       | 13 |
| eTable9: Reasons CAM or CAM-ICU Assessments Were Not Conducted.....                                                           | 14 |
| eTable10: Logistic Regression and Covariate Adjustment for Delirium .....                                                     | 15 |
| eTable11: Sensitivity Analysis – Treating Patients with Missing Assessments as All Positive or All Negative.....              | 17 |
| eTable12: Sensitivity Analysis – Switching Patients Between Groups per Actual Treatment Received (Per Protocol Analysis)..... | 18 |
| eTable13: Frequency of All Serious Adverse Events by Body System and Preferred Term.....                                      | 19 |
| eTable14: Causes of Death up to 30 Days After Surgery .....                                                                   | 22 |
| eFigure1: ENGAGES Study Electroencephalography (EEG) Guided Protocol Quick Reference Guide .....                              | 23 |
| eFigure2: Real-Time Clinician Feedback.....                                                                                   | 25 |
| eFigure3: Anesthesia Fidelity Checklist.....                                                                                  | 28 |
| eFigure4: Kaplan-Meier Curve: 30 Day Survival.....                                                                            | 30 |
| eFigure5: Kaplan-Meier Curve: Cumulative Incidence of Delirium.....                                                           | 31 |
| eFigure6: Delirium Incidence by Comorbidity .....                                                                             | 32 |

## List of investigators and committees in the ENGAGES Trial

**Steering Committee:** Michael S Avidan, MBBCh, Troy S Wildes, MD, Eric J Lenze, MD, Susan Stark, PhD, Daniel A Emmert, MD, Tracey W Stevens, MD, Thomas J Graetz, MD, Sharon K Inouye, MD, MPH, Eva M Schmitt, PhD, Brian A Torres, DNP, Spencer Melby, MD, Ben J Palanca, MD, PhD

**Trial Management Committee:** Michael S Avidan, MBBCh, Sherry L McKinnon, BS, Angela M Mickle, MS, Jordan Oberhaus, BS, Thaddeus P Budelier, MD, Daniel Park, BS

**Data Management Committee:** Arbi Ben Abdallah, PhD, Nan Lin, PhD, Alex Kronzer, BA

**Data Safety Monitoring Board:** Frederick Sieber, MD (Chair), Heather Gwynn Allore, PhD, Donna Marie Fick, PhD, Charles W Hogue Jr, MD, Pratik Pandharipande, MD, Molly Wagster, PhD

**Safety Officer:** Charles Brown, MD

**eTable1: Patient Sociodemographic Characteristics**

|                                | <b>Overall</b> | <b>Guided Group</b> | <b>Usual Care Group</b> |
|--------------------------------|----------------|---------------------|-------------------------|
|                                | <b>N=1232</b>  | <b>N=614</b>        | <b>N=618</b>            |
|                                | No. (%)        | No. (%)             | No. (%)                 |
| <b>Employment status</b>       |                |                     |                         |
| Employed                       | 318 (25.8)     | 167 (27.2)          | 151 (24.4)              |
| Unemployed                     | 43 (3.5)       | 20 (3.3)            | 23 (3.7)                |
| Disabled                       | 99 (8.0)       | 45 (7.3)            | 54 (8.7)                |
| Retired                        | 660 (53.8)     | 327 (53.3)          | 333 (53.9)              |
| <i>Unknown/Not reported</i>    | 112 (9.1)      | 55 (9.0)            | 57 (9.2)                |
| <b>Household median income</b> |                |                     |                         |
| Less than \$50,000             | 709 (57.6)     | 355 (57.8)          | 354 (57.3)              |
| \$50,000 - \$75,000            | 410 (33.3)     | 208 (33.9)          | 202 (32.7)              |
| \$75,000 or more               | 113 (9.2)      | 51 (8.3)            | 62 (10.0)               |
| <b>Health insurance</b>        |                |                     |                         |
| Private                        | 401 (32.6)     | 208 (33.9)          | 193 (31.2)              |
| Public                         | 831 (67.5)     | 406 (66.1)          | 425 (68.8)              |
| <b>Residency</b>               |                |                     |                         |
| Missouri                       | 661 (53.7)     | 332 (54.1)          | 329 (53.2)              |
| Illinois                       | 499 (40.5)     | 246 (40.0)          | 253 (40.9)              |
| Other states                   | 72 (5.8)       | 36 (5.9)            | 36 (5.8)                |
| <b>Living status</b>           |                |                     |                         |
| Lives alone                    | 289 (23.5)     | 136 (22.2)          | 153 (24.8)              |

**eTable2: Pre-Operative Health Conditions: Comorbidities**

|                                                              | <b>Overall</b> | <b>Guided Group</b> | <b>Usual Care Group</b> |
|--------------------------------------------------------------|----------------|---------------------|-------------------------|
|                                                              | <b>N=1232</b>  | <b>N=614</b>        | <b>N=618</b>            |
|                                                              | No. (%)        | No. (%)             | No. (%)                 |
| <b>Charlson Comorbidity Index</b>                            |                |                     |                         |
| 0-1                                                          | 43 (3.5)       | 25 (4.1)            | 18 (2.9)                |
| 2-3                                                          | 300 (24.4)     | 140 (22.8)          | 160 (25.9)              |
| 4-5                                                          | 468 (38.0)     | 230 (37.5)          | 238 (38.5)              |
| 6+                                                           | 421 (34.2)     | 219 (35.7)          | 202 (32.7)              |
| <b>Comorbidities</b>                                         |                |                     |                         |
| Coronary artery disease                                      | 463 (37.6)     | 235 (38.3)          | 228 (36.9)              |
| Congestive heart failure                                     | 251 (20.4)     | 139 (22.6)          | 112 (18.1)              |
| Valvular heart disease                                       | 534 (43.3)     | 279 (54.4)          | 255 (41.3)              |
| Atrial fibrillation                                          | 184 (14.9)     | 94 (15.3)           | 90 (14.6)               |
| Cerebrovascular disease / Stroke / Transient ischemic attack | 194 (15.8)     | 93 (15.2)           | 101 (16.3)              |
| Peripheral artery disease                                    | 143 (11.6)     | 71 (11.6)           | 72 (11.7)               |
| History of aortic aneurysm                                   | 100 (8.1)      | 52 (8.5)            | 48 (7.8)                |
| History of deep venous thrombosis / Pulmonary embolism       | 115 (9.3)      | 61 (9.9)            | 54 (8.7)                |
| Diabetes mellitus                                            | 367 (29.8)     | 189 (30.8)          | 178 (28.8)              |
| Hypertension                                                 | 913 (74.1)     | 462 (75.2)          | 451 (73.0)              |
| Chronic kidney disease                                       | 283 (23.0)     | 144 (23.5)          | 139 (22.5)              |
| Chronic obstructive pulmonary disease                        | 252 (20.5)     | 130 (21.2)          | 122 (19.7)              |
| Asthma                                                       | 111 (9.0)      | 53 (8.6)            | 58 (9.4)                |
| Cirrhosis                                                    | 15 (1.2)       | 9 (1.5)             | 6 (1.0)                 |
| History or currently diagnosed with cancer                   | 614 (49.8)     | 293 (47.7)          | 321 (51.9)              |
| Gastroesophageal reflux disease                              | 518 (42.0)     | 263 (42.8)          | 255 (41.3)              |
| Anemia                                                       | 355 (28.8)     | 186 (30.3)          | 169 (27.4)              |
| Dementia / Cognitive impairment                              | 5 (0.4)        | 3 (0.5)             | 2 (0.3)                 |
| History of delirium                                          | 157 (12.8)     | 78 (12.8)           | 79 (12.9)               |
| History of post-operative delirium                           | 115 (9.4)      | 56 (9.2)            | 59 (9.6)                |
| <b>Sensory impairment</b>                                    |                |                     |                         |
| Hearing impairment                                           | 260 (21.1)     | 137 (22.3)          | 123 (19.9)              |
| Hearing limits daily activities                              | 158 (12.8)     | 79 (12.9)           | 79 (12.8)               |
| Vision impairment                                            | 1127 (91.5)    | 557 (90.7)          | 570 (92.2)              |
| Vision limits daily activities                               | 145 (11.8)     | 72 (11.7)           | 73 (11.8)               |

**eTable3: Patient Sociodemographic Characteristics and Pre-Operative Health Conditions by 30-day follow-up Response**

|                                                       | <b>Overall<br/>N=1,209*</b> | <b>Respondents<br/>N=1036</b> | <b>Non-Respondents<br/>N=173</b> |
|-------------------------------------------------------|-----------------------------|-------------------------------|----------------------------------|
| Age - median [IQR] years                              | 69.3 [64.8 to 75.0]         | 69.3 [64.7 to 74.9]           | 69.2 [65.2 to 75.9]              |
| Female sex – no. (%)                                  | 555 (45.9)                  | 464 (44.8)                    | 91 (52.6)                        |
| Body mass index – median [IQR] kg/m <sup>2</sup>      | 29.0 [25.0 to 33.0]         | 28.0 [25.0 to 33.0]           | 29.0 [25.0 to 34.0]              |
| Race <sup>a</sup> – no. (%)                           |                             |                               |                                  |
| White                                                 | 1090 (90.2)                 | 948 (91.5)                    | 142 (82.1)                       |
| African-American                                      | 107 (8.9)                   | 79 (7.6)                      | 28 (16.2)                        |
| Other                                                 | 12 (1.0)                    | 9 (1.0)                       | 3 (1.7)                          |
| Education: attended college – no. (%)                 | 399 (33.0)                  | 356 (34.4)                    | 43 (24.9)                        |
| Employed – no. (%)                                    | 317 (26.2)                  | 276 (28.8)                    | 41 (28.7)                        |
| Median-income less than \$50,000 – no. (%)            | 695 (57.5)                  | 577 (55.7)                    | 118 (68.2)                       |
| Public health insurance – no. (%)                     | 814 (67.3)                  | 693 (66.9)                    | 121 (69.9)                       |
| Missouri resident – no. (%)                           | 653 (54.0)                  | 549 (53.0)                    | 104 (60.1)                       |
| Lives alone – no. (%)                                 | 285 (23.6)                  | 234 (22.6)                    | 51 (29.5)                        |
| Lifetime tobacco use <sup>b</sup> – no. (%)           | 711 (58.8)                  | 598 (57.7)                    | 113 (65.3)                       |
| Current weekly alcohol use <sup>c</sup> – no. (%)     | 576 (47.6)                  | 507 (48.9)                    | 69 (39.9)                        |
| Current use of anticonvulsants – no. (%)              | 171 (14.1)                  | 130 (12.5)                    | 41 (23.7)                        |
| Regular use of opioids – no. (%)                      | 298 (24.6)                  | 238 (23.0)                    | 60 (34.7)                        |
| Regular use of benzodiazepine – no. (%)               | 187 (15.5)                  | 157 (15.2)                    | 30 (17.3)                        |
| ASA physical classification <sup>d</sup> >3 – no. (%) | 416 (34.4)                  | 344 (33.2)                    | 72 (41.6)                        |
| Marginal exercise tolerance (< 4 METs) – no. (%)      | 578 (47.8)                  | 473 (47.5)                    | 105 (65.2)                       |
| Pulmonary hypertension – no. (%)                      | 187 (15.5)                  | 161 (15.5)                    | 26 (15.0)                        |
| Aortic stenosis – no. (%)                             | 194 (16.0)                  | 168 (16.2)                    | 26 (15.0)                        |

**eTable3: Patient Sociodemographic Characteristics and Pre-Operative Health Conditions by 30-day follow-up Response (cont.)**

|                                                                                  | <b>Overall<br/>N=1,209</b> | <b>Respondents<br/>N=1036</b> | <b>Non-Respondents<br/>N=173</b> |
|----------------------------------------------------------------------------------|----------------------------|-------------------------------|----------------------------------|
| History of delirium – no. (%)                                                    | 151 (12.5)                 | 128 (12.4)                    | 23 (13.3)                        |
| Number of co-morbidities - median [IQR]                                          | 5.0 [3.0 to 6.0]           | 4.0 [3.0 to 6.0]              | 5.0 [3.0 to 7.0]                 |
| History of depression – no. (%)                                                  | 163 (13.5)                 | 125 (12.1)                    | 38 (22.0)                        |
| PHQ8 <sup>e</sup> – median [IQR]                                                 | 3.0 [0.0 to 6.0]           | 3.0 [0.0 to 6.0]              | 4.0 [1.0 to 8.0]                 |
| Short Blessed Test for Cognition <sup>f</sup> – median [IQR]                     | 2.0 [0.0 to 4.0]           | 2.0 [0.0 to 4.0]              | 2.0 [0.0 to 6.0]                 |
| 8-item Interview to Differentiate Aging and Dementia <sup>g</sup> – median [IQR] | 0.0 [0.0 to 1.0]           | 0.0 [0.0 to 1.0]              | 0.0 [0.0 to 1.0]                 |
| Barthel Activities of Daily Living Index <sup>h</sup> – median [IQR]             | 15.0 [15.0 to 15.0]        | 15.0 [15.0 to 15.0]           | 15.0 [14.0 to 15.0]              |
| Grip strength in kg – mean (SD)                                                  | 26.1 (10.9)                | 26.4 (10.7)                   | 24.0 (11.7)                      |
| Timed Up and Go test – median [IQR] seconds                                      | 10.8 [9.3 to 13.2]         | 10.7 [9.2 to 13.0]            | 11.4 [10.0 to 14.9]              |
| Lawton Instrumental Activities of Daily Living <sup>i</sup> – median [IQR]       | 8.0 [7.0 to 8.0]           | 8.0 [8.0 to 8.0]              | 8.0 [7.0 to 8.0]                 |
| VR-12 Physical Component Score <sup>j</sup> – mean (SD)                          | 38.2 (11.8)                | 38.6 (11.8)                   | 35.6 (11.6)                      |
| VR-12 Mental Component Score <sup>j</sup> – mean (SD)                            | 53.6 (10.8)                | 54.1 (10.5)                   | 50.1 (12.1)                      |

IQR, interquartile range.

<sup>a</sup>Patient self reported.

<sup>b</sup>Lifetime tobacco use, which includes current use, was obtained from patients' electronic medical record. During their assessment prior to surgery, patients are asked whether they have ever smoked tobacco.

<sup>c</sup>Alcohol consumption was obtained from patients' electronic medical record. All surgical patients are asked about their average number of drinks per week if they respond that they consume alcoholic drinks.

<sup>d</sup>ASA: American Society of Anesthesiologists physical status classification system, (1 to 6), 1. Healthy patient, 2. Mild systemic disease, 3. Severe systemic disease, 4. Severe systemic disease that is a constant threat to life, 5. Not expected to survive without procedure, 6. Neurologically deceased organ donor. In this study, ASA was dichotomized with a threshold set at 3 or higher

<sup>e</sup>PHQ8: eight-item Personal Health Questionnaire Depression Scale (0 to 24): 10 or more indicates major depression, 20 or more indicates severe major depression

<sup>f</sup>Short Blessed Test for Cognition (0 to 28): 0-4 normal cognition, 5-9 questionable impairment, 10 or more impairment consistent with dementia.

<sup>g</sup>8-item Interview to Differentiate Aging and Dementia (0 to 8): 0-1 Normal cognition, 2 or greater cognitive impairment is likely to be present.

<sup>h</sup>Barthel Activities of Daily Living Index (0 to 100): <20 totally dependent, 20-39 very dependent, 40-59 partially dependent, 60-79 minimally dependent, 80-100 independent

<sup>i</sup>Lawton Instrumental Activities of Daily Living: scale ranges from 0 (low function, dependent) to 8 (high function, independent)

<sup>j</sup>VR-12, Veterans' Rand 12-item Health Survey: standardized 0-100 scale, where 50 represents population average

\*Note: There were 23 patients who died within 30-days post-discharge, 1,232 – 23 = 1,209. The 30 day follow up response rate was 1036/1209 (85.7%)

Statistical differences were found in the following variables:

Sociodemographic: Race (minority) self-reported by patient, Education (did not attend college), and patients with an average median-income less than \$50,000

Health related conditions: Current antoconvulsants & opioid use, ASA status, Marginal exercise tolerance (<4 METS), PHQ8 (depression screen) score, and VR-12 physical component score



**eTable4: Laboratory Values**

|            | Preoperative Laboratory Values <sup>a</sup> |                        |                        | Postoperative Laboratory Values <sup>b</sup> |                        |                        |  |
|------------|---------------------------------------------|------------------------|------------------------|----------------------------------------------|------------------------|------------------------|--|
|            | Overall                                     | Guided Group           | Usual Care Group       | Overall                                      | Guided Group           | Usual Care Group       |  |
|            | Median [IQR]                                | Median [IQR]           | Median [IQR]           | Median [IQR]                                 | Median [IQR]           | Median [IQR]           |  |
| Sodium     | 140.0 [138.0 to 142.0]                      | 140 [138.0 to 142.0]   | 140 [138.0 to 142.0]   | 140.0 [138.0 to 142.0]                       | 140 [138.0 to 142.0]   | 140 [138.0 to 142.0]   |  |
| Potassium  | 4.2 [3.9-4.5]                               | 4.2 [3.9 to 4.9]       | 4.4 [4.0 to 4.5]       | 4.3 [4.0 to 4.7]                             | 4.3 [4.0 to 4.7]       | 4.3 [4.0 to 4.7]       |  |
| BUN        | 18.0 [14.0 to 23.0]                         | 18.0 [14.0 to 23.0]    | 18.0 [14.0 to 22.0]    | 16.0 [12.0 to 21.0]                          | 16.0 [12.0 to 20.0]    | 16.0 [12.0 to 21.0]    |  |
| Creatinine | 1.0 [0.8 to 1.2]                            | 0.99 [0.79 to 1.21]    | 0.97 [0.80 to 1.18]    | 0.9 [0.8 to 1.2]                             | 0.94 [0.76 to 1.17]    | 0.94 [0.76 to 1.20]    |  |
| Glucose    | 102.0 [91.0 to 125.0]                       | 102.0 [ 91.0 to 125.0] | 102.0 [ 90.0 to 126.0] | 156.0 [132.0 to 185.0]                       | 155.0 [133.0 to 182.0] | 156.0 [131.0 to 188.0] |  |
| Albumin    | 4.2 [3.9 to 4.4]                            | 4.2 [3.9 to 4.4]       | 4.1 [3.9 to 4.4]       | 3.5 [3.2 to 3.8]                             | 3.5 [3.2 to 3.8]       | 3.5 [3.2 to 3.8]       |  |
| Hematocrit | 38.7 [34.6 to 42.0]                         | 38.5 [34.3 to 41.9]    | 38.8 [35.1 to 42.3]    | 32.7[29.2 to 36.1]                           | 32.9 [29.2 to 36.2]    | 32.4 [29.4 to 35.9]    |  |
| Hemoglobin | 12.7 [11.2 to 13.9]                         | 12.6 [11.1 to 13.8]    | 12.7 [11.4 to 13.9]    | 10.7[9.6 to 12.7]                            | 10.8 [9.6 to 11.6]     | 10.7 [9.6 to 11.9]     |  |

IQR, interquartile range. BUN, blood urea nitrogen.

<sup>a</sup>Preoperative laboratory values were those documented closest prior to surgery but no more than 30 days prior.

<sup>b</sup>Postoperative lab values were the first values documented following the procedure.

The units for sodium and potassium are mmol/L. BUN, creatinine, glucose and albumin are reported as mg/dL. Hematocrit is a percent, and hemoglobin and albumin are in g/dL.

**eTable5: Surgery Information**

|                                      | <b>Overall</b> | <b>Guided Group</b> | <b>Usual Care Group</b> |
|--------------------------------------|----------------|---------------------|-------------------------|
|                                      | <b>N=1232</b>  | <b>N=614</b>        | <b>N=618</b>            |
|                                      | No. (%)        | No. (%)             | No. (%)                 |
| <b>Preoperative admission status</b> |                |                     |                         |
| Inpatient                            | 318 (25.8)     | 156 (25.4)          | 162 (26.2)              |
| Outpatient                           | 912 (74.0)     | 457 (74.4)          | 455 (73.6)              |
| <b>Type of anaesthesia</b>           |                |                     |                         |
| General without regional             | 1189 (96.5)    | 594 (96.7)          | 595 (96.3)              |
| General plus regional                | 43 (3.5)       | 20 (3.3)            | 23 (3.7)                |
| <b>Surgery type<sup>a</sup></b>      |                |                     |                         |
| Cardiac                              | 475 (38.6)     | 237 (38.6)          | 238 (38.5)              |
| Gastrointestinal                     | 148 (12.0)     | 74 (12.1)           | 74 (12.0)               |
| Gynecologic                          | 94 (7.6)       | 37 (6.0)            | 57 (9.2)                |
| Hepatobiliary-pancreatic             | 165 (13.4)     | 87 (14.2)           | 78 (12.6)               |
| Thoracic                             | 97 (7.9)       | 51 (8.3)            | 46 (7.4)                |
| Urologic                             | 120 (9.7)      | 55 (9.0)            | 65 (10.5)               |
| Vascular                             | 123 (10.0)     | 61 (9.9)            | 62 (10.0)               |
| Other                                | 292 (23.7)     | 89 (14.5)           | 92 (14.9)               |

<sup>a</sup>Patients who underwent combined procedures are reported under multiple surgery types.

**eTable6: Intraoperative Drug Administration**

|                                   | <b>Guided Group</b> | <b>Usual Care Group</b> |
|-----------------------------------|---------------------|-------------------------|
|                                   | <b>N=614</b>        | <b>N=618</b>            |
|                                   | No. (%)             | No. (%)                 |
| <b>Hypnotic agents</b>            |                     |                         |
| Ketamine                          | 33 (5.4)            | 19 (3.1)                |
| Dexmedetomidine                   | 40 (6.5)            | 41 (6.6)                |
| <b>Opioids</b>                    |                     |                         |
| Morphine                          | 5 (<1.0)            | 4 (<1.0)                |
| Hydromorphone                     | 310 (50.5)          | 315 (51.0)              |
| Methadone                         | 31 (5.0)            | 31 (5.0)                |
| Fentanyl                          | 608 (99.0)          | 615 (99.5)              |
| Sufentanil                        | 1 (<1.0)            | 1 (<1.0)                |
| Remifentanyl                      | 1 (<1.0)            | 1 (<1.0)                |
| <b>Neuromuscular blockade</b>     |                     |                         |
| Atracurium                        | 12 (2.0)            | 16 (2.6)                |
| Cisatracurium                     | 58 (9.4)            | 67 (10.8)               |
| Rocuronium                        | 415 (67.6)          | 398 (64.4)              |
| Vecuronium                        | 100 (16.3)          | 93 (15.0)               |
| <b>Vasopressors and inotropes</b> |                     |                         |
| Phenylephrine                     | 501 (81.6)          | 513 (83.0)              |
| Ephedrine                         | 180 (29.3)          | 199 (32.2)              |
| Epinephrine                       | 68 (11.1)           | 102 (16.5)              |
| Norepinephrine                    | 252 (41.0)          | 254 (41.1)              |
| Dobutamine                        | 102 (16.6)          | 98 (15.9)               |
| Milrinone                         | 22 (3.6)            | 25 (4.0)                |

**eTable7: Intraoperative Cumulative Durations of Low/High Mean Arterial Pressure and Heart Rate**

|                      | <b>Guided Group</b><br><b>N=613</b> | <b>Usual Care Group</b><br><b>N=617</b> | <i>P</i> -Value | <b>Difference In Medians</b> | <b>95% CI</b> |
|----------------------|-------------------------------------|-----------------------------------------|-----------------|------------------------------|---------------|
|                      | Median minutes [IQR]                | Median minutes [IQR]                    |                 |                              |               |
| <b>MAP threshold</b> |                                     |                                         |                 |                              |               |
| BP <55               | 3.0 [0.0 to 9.0]                    | 2.0 [0.0 to 8.0]                        | 0.36            | 1.0                          | -0.1 to 1.9   |
| BP <60               | 7.0 [2.0 to 19.0]                   | 7.0 [1.0 to 19.0]                       | 0.62            | 0.0                          | -1.7 to 1.7   |
| BP <65               | 20.0 [6.0 to 45.0]                  | 20.0 [6.0 to 46.0]                      | 0.77            | 0.0                          | -4.9 to 4.9   |
| BP <70               | 42.0 [15.0 to 89.0]                 | 43.0 [17.0 to 93.0]                     | 0.17            | -1.0                         | -9.8 to 7.8   |
| BP <75               | 76.0 [31.0 to 142.0]                | 81.0 [41.0 to 145.0]                    | 0.09            | -5.0                         | -17.2 to 7.2  |
| BP >110              | 8.0 [2.0 to 17.0]                   | 6.0 [2.0 to 15.0]                       | 0.004           | 2.0                          | -0.6 to 3.4   |
| BP >115              | 5.0 [1.0 to 12.0]                   | 4.0 [0.0 to 10.0]                       | 0.007           | 1.0                          | -0.1 to 2.1   |
| BP >120              | 3.0 [0.0 to 8.0]                    | 3.0 [0.0 to 7.0]                        | 0.002           | 0.0                          | -0.9 to 0.9   |
| <b>HR threshold</b>  |                                     |                                         |                 |                              |               |
| HR <40               | 0.0 [0.0 to 0.0]                    | 0.0 [0.0 to 0.0]                        | 0.73            | 0.0                          | –             |
| HR <50               | 0.0 [0.0 to 11.0]                   | 0.0 [0.0 to 10.0]                       | 0.93            | 0.0                          | -0.6 to 0.6   |
| HR >100              | 1.0 [0.0 to 11.0]                   | 1.0 [0.0 to 9.0]                        | 0.97            | 0.0                          | -0.9 to 0.9   |

IQR, interquartile range; BP, blood pressure; HR, heart rate; MAP, mean arterial pressure.

| <b>eTable8: Number of Delirium Assessments Completed</b> |                                      |                                      |
|----------------------------------------------------------|--------------------------------------|--------------------------------------|
|                                                          | <b>CAM/CAM-ICU Completed</b>         | <b>Chart Review Completed</b>        |
|                                                          | <b>No./total no. (%)<sup>a</sup></b> | <b>No./total No. (%)<sup>a</sup></b> |
| <b>Postoperative day 1</b>                               | 1057/1194 (88.5)                     | 1194/1194 (100.0)                    |
| <b>Postoperative day 2</b>                               | 1013/1157 (87.6)                     | 1157/1157 (100.0)                    |
| <b>Postoperative day 3</b>                               | 861/1061 (81.1)                      | 1061/1061 (100.0)                    |
| <b>Postoperative day 4</b>                               | 717/895 (80.1)                       | 895/895 (100.0)                      |
| <b>Postoperative day 5</b>                               | 580/756 (76.7)                       | 756/756 (100.0)                      |

CAM, Confusion Assessment Method; CAM-ICU, Confusion Assessment Method for the intensive care unit.

<sup>a</sup>Denominators are the number of patients eligible for an assessment on each postoperative day. Patients were eligible if they were alive, in the hospital and had RASS score >-4.

At least one CAM or CAM-ICU assessment was performed in 1188 patients while chart review was completed on all eligible patients. A total of 1213 of the 1232 randomized patients had the delirium outcome assessed during postoperative days 1-5 using one of these modalities. Of the 19 remaining patients, one patient died during surgery, 3 patients withdrew from the study the day of surgery, 11 patients were heavily sedated over the entire assessment period, and 4 patients were discharged prior to the afternoon of postoperative day 1.

**Table 9: Reasons CAM or CAM-ICU Assessments Were Not Conducted**

| Reasons for Ineligibility                                  | Postoperative Day 1 | Postoperative Day 2 | Postoperative Day 3 | Postoperative Day 4 | Postoperative Day 5 |
|------------------------------------------------------------|---------------------|---------------------|---------------------|---------------------|---------------------|
| Discharged <sup>a</sup>                                    | 13                  | 73                  | 211                 | 363                 | 521                 |
| Died <sup>a</sup>                                          | 1                   | 2                   | 3                   | 4                   | 6                   |
| <b>Reasons not assessed</b>                                |                     |                     |                     |                     |                     |
| Refused                                                    | 81                  | 72                  | 83                  | 83                  | 70                  |
| Undergoing medical procedure                               | 11                  | 7                   | 12                  | 6                   | 7                   |
| Sedation or coma (RASS < -3)                               | 43                  | 33                  | 30                  | 24                  | 23                  |
| Other <sup>b</sup>                                         | 26                  | 32                  | 32                  | 35                  | 25                  |
| <b>Total not completed – no./total no. (%)<sup>c</sup></b> | 161/1194 (13.5)     | 144/1157 (12.4)     | 157/1061 (14.8)     | 148/895 (16.5)      | 125/756 (16.5)      |

CAM, Confusion Assessment Method; CAM-ICU, Confusion Assessment Method for the intensive care unit; RASS, Richmond Agitation and Sedation Scale.

<sup>a</sup>Cumulative values.

<sup>b</sup>Other may include family or nursing request, or patient withdrew.

<sup>c</sup>Denominators are the number of patients eligible for an assessment on each postoperative day. Patients were eligible if they were alive, in the hospital and had RASS score >-4.

**Table 10: Logistic Regression and Covariate Adjustment for Delirium**

The purpose of the logistic regression and adjustment for prognostic covariates was to improve the power of the trial to detect a beneficial effect attributable to the intervention (minimization of electroencephalographic suppression) or to usual anesthesia care on the outcome of interest, postoperative delirium. The covariates included were pre-selected and considered likely to be associated with postoperative delirium.

**Logistic Regression**

|                                        | <b>Coefficient</b> | <b>P-Value</b>              | <b>Odds Ratio</b> | <b>95% CI</b> |
|----------------------------------------|--------------------|-----------------------------|-------------------|---------------|
| Guided group                           | 0.192              | 0.21                        | 1.21              | 0.90 to 1.64  |
| Age                                    | 0.039              | <0.001                      | 1.04              | 1.02 to 1.06  |
| Male                                   | -0.012             | 0.94                        | 0.99              | 0.71 to 1.38  |
| White                                  | -0.784             | <0.001                      | 0.46              | 0.28 to 0.74  |
| Living alone                           | -0.091             | 0.62                        | 0.91              | 0.63 to 1.32  |
| Hearing aid use                        | -0.197             | 0.40                        | 0.82              | 0.52 to 1.30  |
| Number of comorbidities (1-10)         | 0.078              | 0.03                        | 1.08              | 1.01 to 1.16  |
| ASA <sup>a</sup> (> 3)                 | 0.683              | 0.003                       | 1.98              | 1.27 to 3.09  |
| Marginal exercise tolerance (< 4 METS) | 0.190              | 0.27                        | 1.21              | 0.86 to 1.70  |
| Falls in previous 6 months             | 0.221              | 0.21                        | 1.25              | 0.88 to 1.76  |
| History of delirium                    | 0.603              | 0.004                       | 1.83              | 1.21 to 2.76  |
| Preoperative PHQ8                      | 0.029              | 0.12                        | 1.03              | 0.99 to 1.07  |
| Preoperative Lawton                    | -0.053             | 0.45                        | 0.95              | 0.83 to 1.09  |
| Preoperative Barthel                   | -0.048             | 0.56                        | 0.95              | 0.81 to 1.12  |
| Preoperative opioids                   | 0.236              | 0.20                        | 1.27              | 0.88 to 1.82  |
| Preoperative benzodiazepines           | 0.249              | 0.24                        | 1.28              | 0.85 to 1.94  |
| Preoperative sodium level              | -0.016             | 0.52                        | 0.98              | 0.94 to 1.03  |
| Preoperative creatinine level          | 0.055              | 0.47                        | 1.06              | 0.91 to 1.22  |
| Preoperative hemoglobin level          | -0.007             | 0.88                        | 0.99              | 0.91 to 1.08  |
| Cardiac surgery                        | -0.089             | 0.70                        | 0.92              | 0.58 to 1.44  |
| Intercept                              | -0.916             | 0.81                        | -                 | -             |
| <b>Observations<sup>b</sup></b>        | <b>ROC Area</b>    | <b>Standard Error</b>       | <b>95% CI</b>     |               |
| n=1,051                                | 0.6951             | 0.0188                      | 0.66 to 0.73      |               |
| Pearsons chi2 = 1043.46                |                    | Hosmer-Lemeshow chi2 = 7.79 |                   |               |
| Prob > chi2 = 0.3783                   |                    | Prob > chi2 = 0.4542        |                   |               |

CI, Confidence Interval; PHQ8, eight-item Patient Health Questionnaire depression scale; ROC, receiver operating characteristic.

<sup>a</sup>ASA: American Society of Anesthesiologists physical status classification system, 1-6, 1. Healthy patient, 2. Mild systemic disease, 3. Severe systemic disease, 4. Severe systemic disease that is a constant threat to life, 5. Not expected to survive without procedure, 6. Neurologically deceased organ donor. In this study, ASA was dichotomized with a threshold set at 3 or higher.

The logistic regression adjusted odds ratio for delirium was 1.21 (95% CI, 0.90 to 1.64; *P*=0.21) in the guided group with reference to the usual care group.

<sup>b</sup>No imputation was performed. The amount of missing data for any individual characteristic included in this model was less than 10%. The overall percentage of patients excluded from this analysis was 13.4% (N=162/1213).

**Standardized Adjustment Method with Bootstrapped Standard Error**

| <b>Parameters</b> | <b>dy/dx</b> | <b>Delta-Method<br/>Standard Error</b> | <b>Z</b> | <b>P&gt;  z </b> | <b>95% CI</b>   |
|-------------------|--------------|----------------------------------------|----------|------------------|-----------------|
| Logit (n=1051)    | 0.032        | 0.0253                                 | 1.25     | 0.210            | -0.018 to 0.081 |

| <b>Parameters</b>  | <b>Observed<br/>Coefficient</b> | <b>Bootstrap<br/>Standard Error</b> | <b>Z</b> | <b>P&gt;  z </b> | <b>95% CI</b>   |
|--------------------|---------------------------------|-------------------------------------|----------|------------------|-----------------|
| Bootstrap (n=1000) | 0.032                           | 0.0258                              | 1.23     | 0.218            | -0.019 to 0.082 |

CI, confidence interval.  
 Using the standardized estimator method with bootstrapping, the standardized marginal effect was 0.032 (P=0.22; 95% CI, -0.019 to 0.082).



**eTable11: Sensitivity Analyses – Treating Patients with Missing Assessments as All Positive or All Negative**

|                                                                                            | <b>Guided Group</b> | <b>Usual Care Group</b> | <b>Difference<sup>a</sup><br/>(95%CI)</b> | <b>P-Value<sup>b</sup></b> |
|--------------------------------------------------------------------------------------------|---------------------|-------------------------|-------------------------------------------|----------------------------|
| Analysis with no imputation of missing delirium assessments (for the purpose of reference) |                     |                         |                                           |                            |
| - Delirium incidence – no./total (%)                                                       | 157/604<br>(26.0)   | 140/609<br>(23.0)       | 3.0% (-2.0 to 8.0)                        | 0.22                       |
| Analyses with imputed missing delirium assessments                                         |                     |                         |                                           |                            |
| - All missing imputed as +ve – no./total (%)                                               | 167/614<br>(27.2)   | 148/617<br>(24.0)       | 3.2% (-2.0 to 8.2)                        | 0.22                       |
| - All missing imputed as -ve – no./total (%)                                               | 157/614<br>(25.6)   | 140/617<br>(22.7)       | 2.9% (-2.0 to 7.8)                        | 0.26                       |

CI, confidence interval.

<sup>a</sup>Absolute difference between groups. All 95%CIs for difference between medians were computed using Hodges-Lehmann estimator with asymptotic standard error.

<sup>b</sup>P values were calculated with the use of the chi-square test with Fisher's exact test.

<sup>c</sup>Note: One patient died on the day of surgery.

**eTable12: Sensitivity Analysis – Actual Treatment Received (Per Protocol Analysis) and Per Protocol Analyses with Imputation of Missing Delirium Assessments**

|                                                                          | <b>Guided Group</b> | <b>Usual Care Group</b> | <b>Difference<sup>a</sup><br/>(95%CI)</b> | <b>P-Value<sup>b</sup></b> |
|--------------------------------------------------------------------------|---------------------|-------------------------|-------------------------------------------|----------------------------|
| Per protocol analysis with no imputation of missing delirium assessments |                     |                         |                                           |                            |
| Delirium incidence – no./total no. (%)                                   | 161/608<br>(26.5)   | 136/605<br>(22.5)       | 4.0% (-1.0 to 8.8)                        | 0.11                       |
| Per protocol analyses with imputed missing delirium assessments          |                     |                         |                                           |                            |
| - All missing imputed as +ve – no./total (%) <sup>c</sup>                | 172/619<br>(27.8)   | 143/612<br>(23.4)       | 4.4% (-0.6 to 9.4)                        | 0.08                       |
| - All missing imputed as -ve – no./total (%) <sup>c</sup>                | 161/619<br>(26.1)   | 136/612<br>(22.2)       | 3.9% (-1.1 to 8.7)                        | 0.13                       |

CI, confidence interval.

<sup>a</sup>Absolute difference between groups. All 95%CIs for difference between medians were computed using Hodges-Lehmann estimator with asymptotic standard error.

<sup>b</sup>P values were calculated with the use of the chi-square test with Fisher's exact test.

<sup>c</sup>Note: One patient died on the day of surgery

**eTable13: Frequency of All Serious Adverse Events by Body System and Preferred Term**

|                                                  | <b>Total</b>     | <b>Guided Group</b> | <b>Usual Care Group</b> |
|--------------------------------------------------|------------------|---------------------|-------------------------|
|                                                  | <b>N=398</b>     | <b>N=198</b>        | <b>N=209</b>            |
|                                                  | No. (%)          | No. (%)             | No. (%)                 |
| <b>Hematologic</b>                               | <b>16 (4.0)</b>  | <b>5 (2.5)</b>      | <b>11 (5.2)</b>         |
| Bleeding/anemia requiring unexpected transfusion | 3 (0.7)          | 1 (0.5)             | 2 (0.9)                 |
| Embolus (e.g., PE)                               | 2 (0.5)          | 1 (0.5)             | 1 (0.4)                 |
| Thrombocytopenia                                 | 4 (1.0)          | 1 (0.5)             | 3 (1.4)                 |
| Thrombosis without embolus (e.g., DVT)           | 6 (1.5)          | 1 (0.5)             | 5 (2.3)                 |
| Other hematologic event                          | 1 (0.2)          | 1 (0.5)             | 0 (0.0)                 |
| <b>Cardiac event</b>                             | <b>58 (14.5)</b> | <b>21 (10.6)</b>    | <b>37 (17.7)</b>        |
| Cardiac arrest (CPR)                             | 13 (3.2)         | 1 (0.5)             | 12 (5.7)                |
| Cardiac tamponade                                | 1 (0.2)          | 1 (0.5)             | 0 (0.0)                 |
| Congestive heart failure                         | 6 (1.5)          | 4 (2.0)             | 2 (0.9)                 |
| Myocardial infarction                            | 8 (2.0)          | 3 (1.5)             | 5 (2.3)                 |
| Unexpected atrial fibrillation                   | 4 (1.0)          | 2 (1.0)             | 2 (0.9)                 |
| Unexpected cardiogenic shock                     | 8 (2.0)          | 2 (1.0)             | 6 (2.8)                 |
| Unexpected heart block                           | 6 (1.5)          | 3 (1.5)             | 3 (1.4)                 |
| Other unexpected abnormal heart rhythms          | 5 (1.2)          | 0 (0)               | 5 (2.3)                 |
| <b>Endocrine and metabolic</b>                   | <b>10 (2.5)</b>  | <b>4 (2.0)</b>      | <b>6 (2.8)</b>          |
| Unexpected hypo- or hyperkalemia                 | 1 (0.2)          | 1 (0.5)             | 0 (0.0)                 |
| Unexpected hypo- or hypernatremia                | 1 (0.2)          | 0 (0.0)             | 1 (0.4)                 |
| Other endocrine or metabolic event               | 8 (2.0)          | 3 (1.5)             | 5 (2.3)                 |
| <b>Gastrointestinal</b>                          | <b>72 (18.0)</b> | <b>39 (19.6)</b>    | <b>33 (15.7)</b>        |
| Anastomotic leak                                 | 3 (0.7)          | 0 (0.0)             | 3 (1.4)                 |

| <b>Table 13: Frequency of All Serious Adverse Events by Body System and Preferred Term (cont.)</b> |                  |                     |                         |
|----------------------------------------------------------------------------------------------------|------------------|---------------------|-------------------------|
|                                                                                                    | <b>Total</b>     | <b>Guided Group</b> | <b>Usual Care Group</b> |
|                                                                                                    | <b>N=398</b>     | <b>N=198</b>        | <b>N=209</b>            |
|                                                                                                    | No. (%)          | No. (%)             | No. (%)                 |
| <b>Gastrointestinal (cont.)</b>                                                                    | <b>72 (18.0)</b> | <b>39 (19.6)</b>    | <b>33 (15.7)</b>        |
| Nausea and/or vomiting                                                                             | 11 (2.7)         | 8 (4.0)             | 3 (1.4)                 |
| GI bleed                                                                                           | 6 (1.5)          | 5 (2.5)             | 1 (0.4)                 |
| Ileus/bowel obstruction                                                                            | 20 (5.0)         | 12 (6.0)            | 8 (3.8)                 |
| Other GI event                                                                                     | 32 (8.0)         | 14 (7.0)            | 18 (8.6)                |
| <b>Immune or infectious event</b>                                                                  | <b>59 (14.8)</b> | <b>26 (13.1)</b>    | <b>33 (15.7)</b>        |
| Anaphylaxis                                                                                        | 3 (0.7)          | 2 (1.0)             | 1 (0.4)                 |
| Infectious colitis                                                                                 | 5 (1.2)          | 1 (0.5)             | 4 (1.9)                 |
| Sepsis                                                                                             | 20 (5.0)         | 9 (4.5)             | 11 (5.2)                |
| UTI                                                                                                | 3 (0.7)          | 2 (1.0)             | 1 (0.4)                 |
| Wound infection                                                                                    | 24 (6.0)         | 11 (5.5)            | 13 (6.2)                |
| Other immune or infectious event                                                                   | 4 (1.0)          | 1 (0.5)             | 3 (1.4)                 |
| <b>Neurological event</b>                                                                          | <b>24 (6.0)</b>  | <b>15 (7.5)</b>     | <b>9 (4.3)</b>          |
| Anoxic encephalopathy                                                                              | 1 (0.2)          | 0 (0.0)             | 1 (0.4)                 |
| Stroke                                                                                             | 14 (3.5)         | 10 (5.0)            | 4 (1.9)                 |
| Pain                                                                                               | 2 (0.5)          | 2 (1.0)             | 0 (0.0)                 |
| Other neurological event                                                                           | 7 (1.7)          | 3 (1.5)             | 4 (1.9)                 |
| <b>Pulmonary event</b>                                                                             | <b>79 (19.8)</b> | <b>42 (21.2)</b>    | <b>37 (17.7)</b>        |
| Hemothorax                                                                                         | 4 (1.0)          | 3 (1.5)             | 1 (0.4)                 |
| Pleural effusion                                                                                   | 4 (1.0)          | 1 (0.5)             | 3 (1.4)                 |
| Pneumonia                                                                                          | 13 (3.2)         | 10 (5.0)            | 3 (1.4)                 |

| <b>eTable13: Frequency of All Serious Adverse Events by Body System and Preferred Term (cont.)</b> |                 |                     |                         |
|----------------------------------------------------------------------------------------------------|-----------------|---------------------|-------------------------|
|                                                                                                    | <b>Total</b>    | <b>Guided Group</b> | <b>Usual Care Group</b> |
|                                                                                                    | <b>N=398</b>    | <b>N=198</b>        | <b>N=209</b>            |
|                                                                                                    | No. (%)         | No. (%)             | No. (%)                 |
| Pneumothorax                                                                                       | 2 (0.5)         | 1 (0.5)             | 1 (0.4)                 |
| Respiratory failure                                                                                | 48 (12.0)       | 21 (10.6)           | 27 (12.9)               |
| Other respiratory event                                                                            | 8 (2.0)         | 6 (3.0)             | 2 (0.9)                 |
| <b>Renal system</b>                                                                                | <b>27 (6.7)</b> | <b>11 (5.5)</b>     | <b>16 (7.6)</b>         |
| Acute kidney injury                                                                                | 7 (1.7)         | 1 (0.5)             | 6 (2.8)                 |
| Renal failure requiring dialysis                                                                   | 13 (3.2)        | 6 (3.0)             | 7 (3.3)                 |
| Urinary retention                                                                                  | 1 (0.2)         | 1 (0.5)             | 0 (0.0)                 |
| Other renal event                                                                                  | 6 (1.5)         | 3 (1.5)             | 3 (1.4)                 |
| <b>Vascular system</b>                                                                             | <b>27 (6.7)</b> | <b>14 (7.0)</b>     | <b>13 (6.2)</b>         |
| Non-cardiogenic shock                                                                              | 6 (1.5)         | 3 (1.5)             | 3 (1.4)                 |
| Unexpected hypotension                                                                             | 5 (1.2)         | 4 (2.0)             | 1 (0.4)                 |
| Other vascular event                                                                               | 16 (4.0)        | 7 (3.5)             | 9 (4.3)                 |
| <b>Other body system event</b>                                                                     | <b>26 (6.5)</b> | <b>12 (6.0)</b>     | <b>14 (6.6)</b>         |

| <b>Table 14: Causes of Death up to 30 Days After Surgery</b> |               |                     |                         |
|--------------------------------------------------------------|---------------|---------------------|-------------------------|
|                                                              | <b>Total*</b> | <b>Guided Group</b> | <b>Usual Care Group</b> |
|                                                              | <b>N=23</b>   | <b>N=4</b>          | <b>N=19</b>             |
| <b>Cardiac event</b>                                         | <b>9</b>      | <b>2</b>            | <b>7</b>                |
| Cardiac arrest                                               | 2             | 0                   | 2                       |
| Cardiogenic shock                                            | 3             | 0                   | 3                       |
| Congestive heart failure                                     | 3             | 1                   | 2                       |
| Unexpected atrial fibrillation                               | 1             | 1                   | 0                       |
| <b>Gastrointestinal</b>                                      | <b>3</b>      | <b>0</b>            | <b>3</b>                |
| Anastomotic leak                                             | 1             | 0                   | 1                       |
| Perforated abdominal viscus                                  | 2             | 0                   | 2                       |
| <b>Immune or infectious event</b>                            | <b>2</b>      | <b>1</b>            | <b>1</b>                |
| Sepsis                                                       | 2             | 1                   | 1                       |
| <b>Neurological event</b>                                    | <b>1</b>      | <b>0</b>            | <b>1</b>                |
| Stroke                                                       | 1             | 0                   | 1                       |
| <b>Pulmonary event</b>                                       | <b>1</b>      | <b>0</b>            | <b>1</b>                |
| Respiratory failure                                          | 1             | 0                   | 1                       |
| <b>Renal event</b>                                           | <b>1</b>      | <b>0</b>            | <b>1</b>                |
| Acute kidney injury                                          | 1             | 0                   | 1                       |
| <b>Other</b>                                                 | <b>6</b>      | <b>1</b>            | <b>5</b>                |
| Hemorrhagic shock                                            | 1             | 0                   | 1                       |
| Abdominal aortic aneurysm                                    | 1             | 0                   | 1                       |
| Cancer                                                       | 2             | 0                   | 2                       |
| Hemothorax                                                   | 1             | 1                   | 0                       |
| Unknown                                                      | 1             | 0                   | 1                       |

## eFigure1: ENGAGES Study Electroencephalography (EEG) Guided Protocol Quick Reference Guide

This guide was provided to anesthesia clinicians caring for patients in the Guided arm on the day of surgery to assist with EEG guidance of anesthesia.

### 1) EEG-guided protocol monitor setup

- Set the EEG wave to display at both 50 mm/second and 6.25 mm/second sweep speeds.** The faster 50 mm/s sweep is good for appreciating higher frequency waves while the 6.25 mm/s sweep is good for appreciating delta waves.
- Set the EEG amplitude scale to 50  $\mu$ V.** Adjust as needed for optimal display on each patient.
- Turn EEG filter off** to prevent low frequency filtering (i.e., delta wave filtering).
- EEG alarms:** BIS alarm range is set to low/high limits of 40/60 by default. Adjust according to clinical discretion.
- Numeric values:** The BIS (bispectral index), SQI (signal quality index), SR (suppression ratio), EMG (electromyographic strength), and SEF (spectral edge frequency 95%) should be displayed on the monitor.

### 2) Important EEG frequency ranges include gamma (>30 Hz), high beta (20-30 Hz), low beta (12-20 Hz), alpha (8-12 Hz), theta (4-8 Hz), and delta (0.5-4 Hz).

- 3) **The EEG of the awake patient:** The awake EEG is dominated by high-frequency (i.e., high beta and gamma) activity, usually of low amplitude, producing a fuzzy-appearing wave on the faster 50 mm/s tracing. High-frequency, high-amplitude activity (EMG) may be seen. Additionally, periodic high-amplitude deviations (from blinking) may be observed.

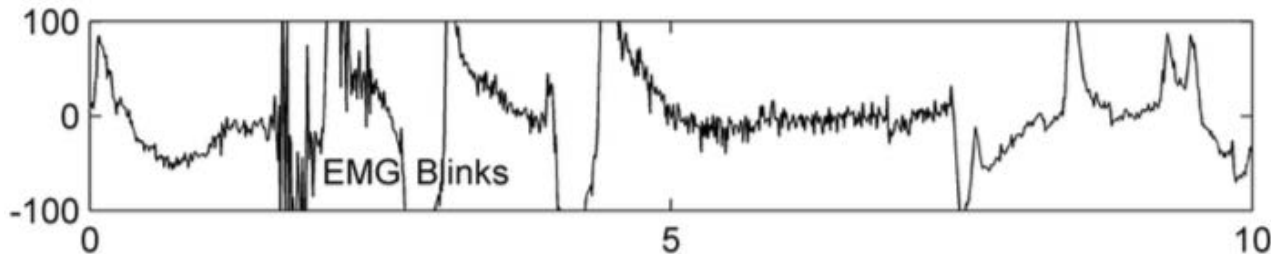

- 4) **The EEG during general anesthesia:** The key EEG features that indicate appropriate anesthetic depth are the **presence of delta (0.5-4 Hz) waves**, **absence of high beta (20-30 Hz) waves**, and **absence of any periods of burst suppression**. Waves in the alpha (8-12 Hz), theta (4-8 Hz) or low beta (12-20 Hz) frequency ranges, often termed spindles, may or may not be superimposed. In the absence of contrary information or an artifactual EEG wave, BIS values below 40 also suggest that anesthesia is too deep. If delta activity is absent and other data support that anesthetic depth may be inadequate, increasing anesthetic administration might be indicated.

*In the following figures, the dotted red trace demonstrates waves in the delta range (~1 Hz).*

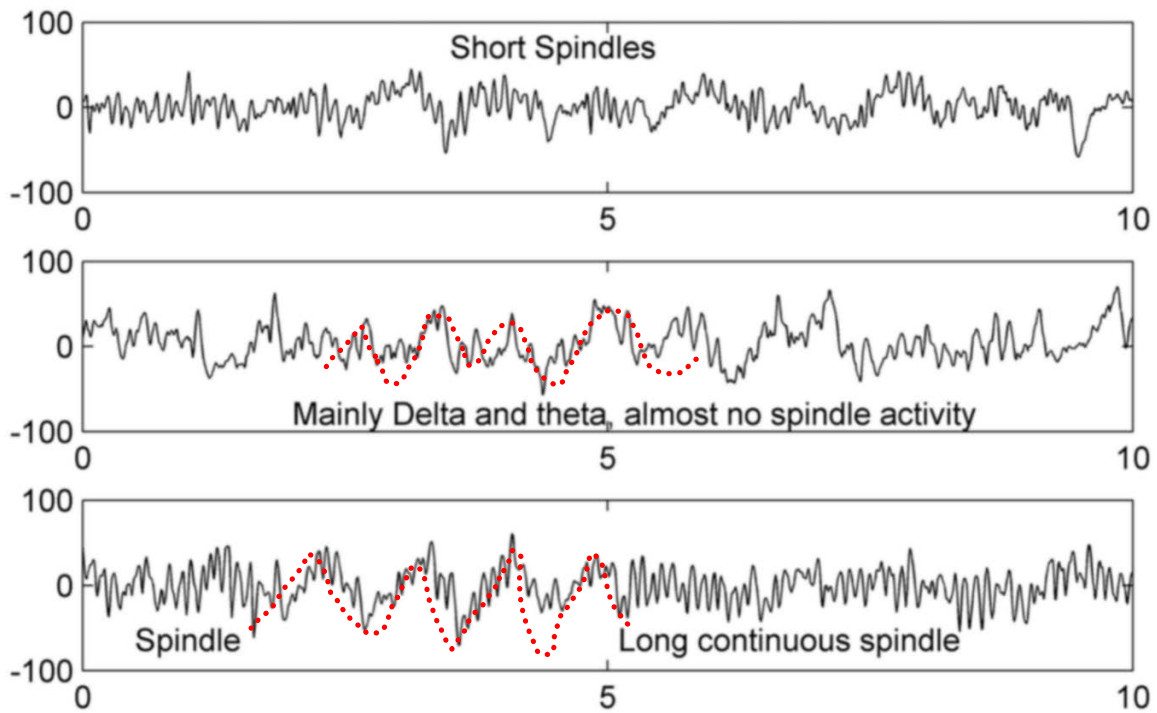

5) **EEG suppression:** Any flattened interval on the EEG tracing (EEG suppression) indicates excessive anesthetic depth or suggests the presence of other suppressive stimuli (e.g., cerebral ischemia). Any amount of EEG suppression should be avoided as a part of the ENGAGES EEG-guided protocol, unless clinically required. EEG suppression is frequently observed after boluses of induction agents, including small doses given intraoperatively (e.g., propofol 20-50mg). For example, anesthetic boluses are sometimes administered to hypertensive patients whose EEG and anesthetic concentrations indicate adequate anesthesia, thus triggering EEG suppression. EEG suppression is also variably observed with anesthetic induction. The duration of such suppression should be minimized if possible.

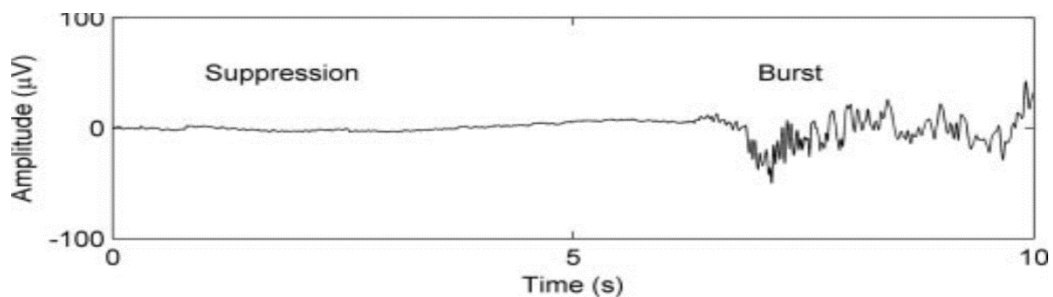

6) Age-adjusted concentrations for volatile agents to achieve 0.5 MAC / 0.75 MAC / 1.0 MAC:

| Age | Desflurane (% atm) |          |         | Isoflurane (% atm) |          |         | Sevoflurane (% atm) |          |         |
|-----|--------------------|----------|---------|--------------------|----------|---------|---------------------|----------|---------|
|     | 0.5 MAC            | 0.75 MAC | 1.0 MAC | 0.5 MAC            | 0.75 MAC | 1.0 MAC | 0.5 MAC             | 0.75 MAC | 1.0 MAC |
| 65  | 2.8%               | 4.2%     | 5.7%    | 0.5%               | 0.8%     | 1.0%    | 0.8%                | 1.2%     | 1.5%    |
| 75  | 2.7%               | 4.0%     | 5.3%    | 0.5%               | 0.7%     | 0.9%    | 0.7%                | 1.1%     | 1.4%    |
| 85  | 2.5%               | 3.7%     | 5.0%    | 0.4%               | 0.7%     | 0.9%    | 0.7%                | 1.0%     | 1.4%    |
| 95  | 2.3%               | 3.5%     | 4.7%    | 0.4%               | 0.6%     | 0.8%    | 0.6%                | 1.0%     | 1.3%    |

**References:** Individual EEG tracings from: Bennett, C., Voss, L. J., Barnard, J. P. M. & Sleight, J. W. Practical Use of the Raw Electroencephalogram Waveform During General Anesthesia: The Art and Science. *Anesth Analg* **109**, 539–550 (2009).



## eFigure2: Real-Time Clinician Feedback.

**Example 1:** An example of the real time feedback provided to the anesthesia provider in the operating room during the procedure for patients in the guided group.

Photograph of the anesthesia monitor during the procedure:

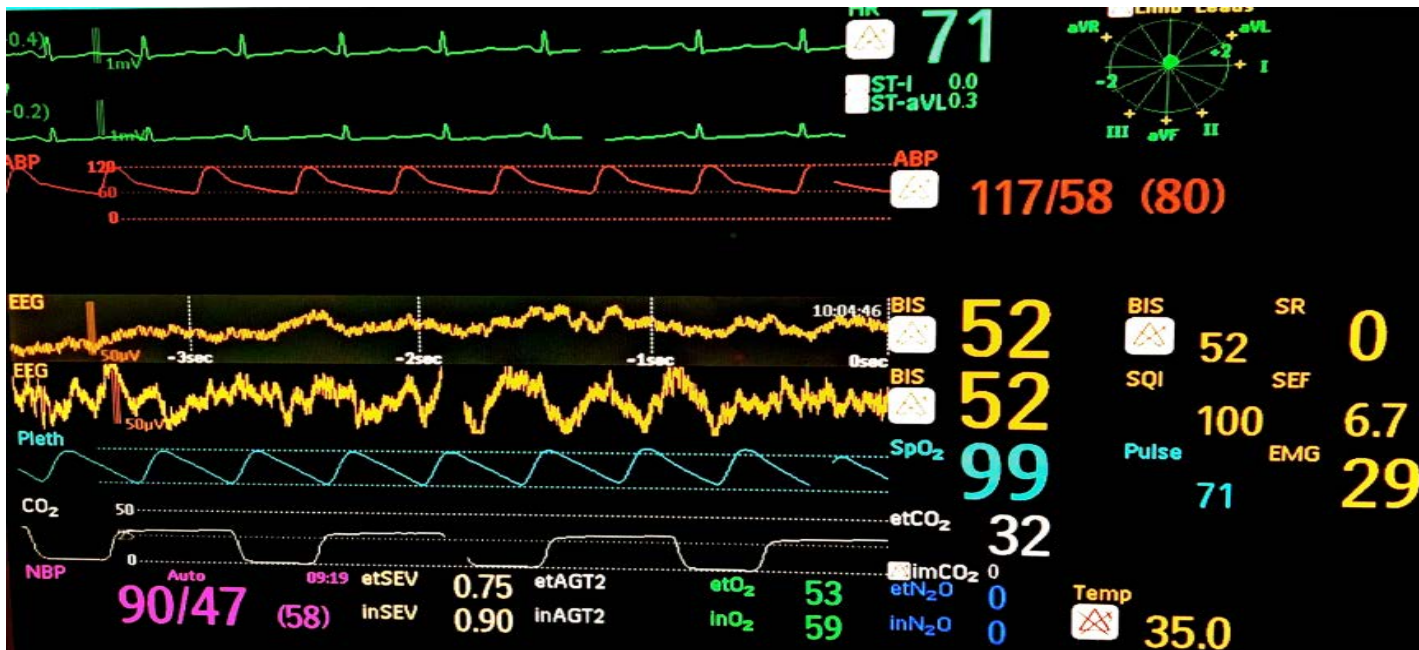

Feedback on the electroencephalogram features that was provided to the anesthesia clinicians:

Based on EEG criteria alone, anesthesia is “deep” (only slow [delta and theta] waves, SEF is low). The BIS of 52 is higher than I would expect from EEG features alone. Taking both anesthetic concentration (~0.6 aaMAC) and EEG features into account, no change in anesthesia seems to be indicated.

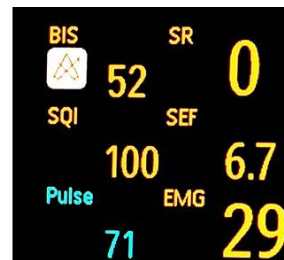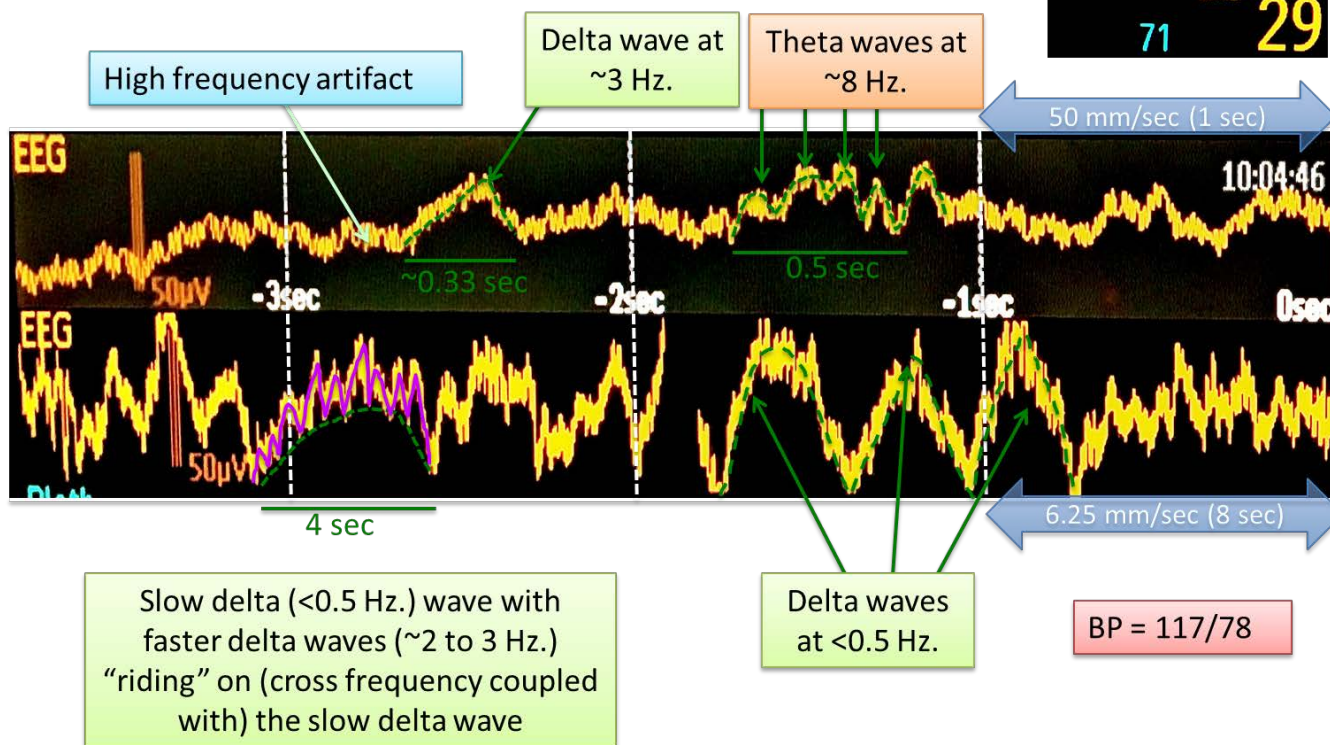

**Example 2:** An example of the real time feedback provided to the anesthesia provider in the operating room during the procedure for patients in the guided group.

Photograph of the anesthesia monitor during the procedure:

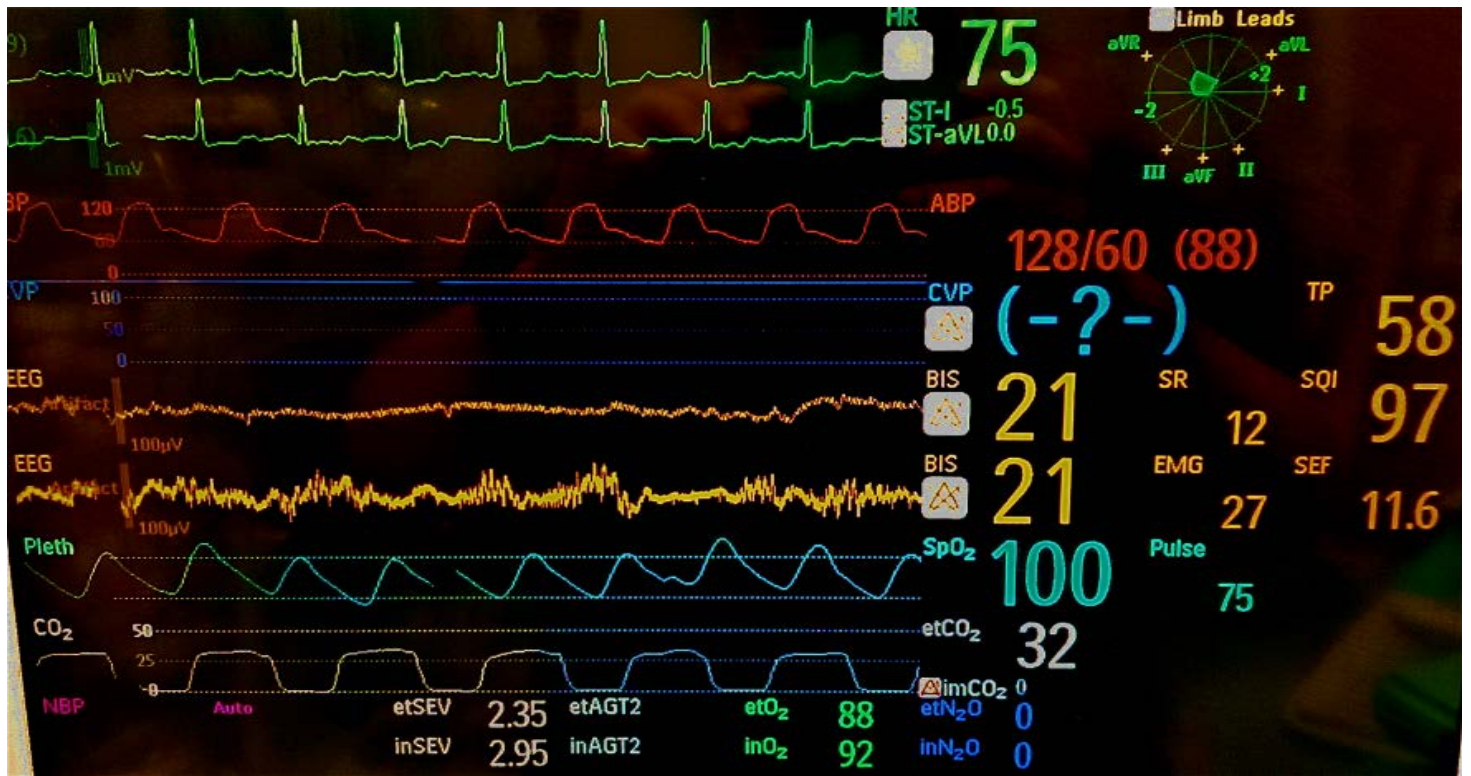

Feedback on the electroencephalogram features that was provided to the anesthesia clinicians:

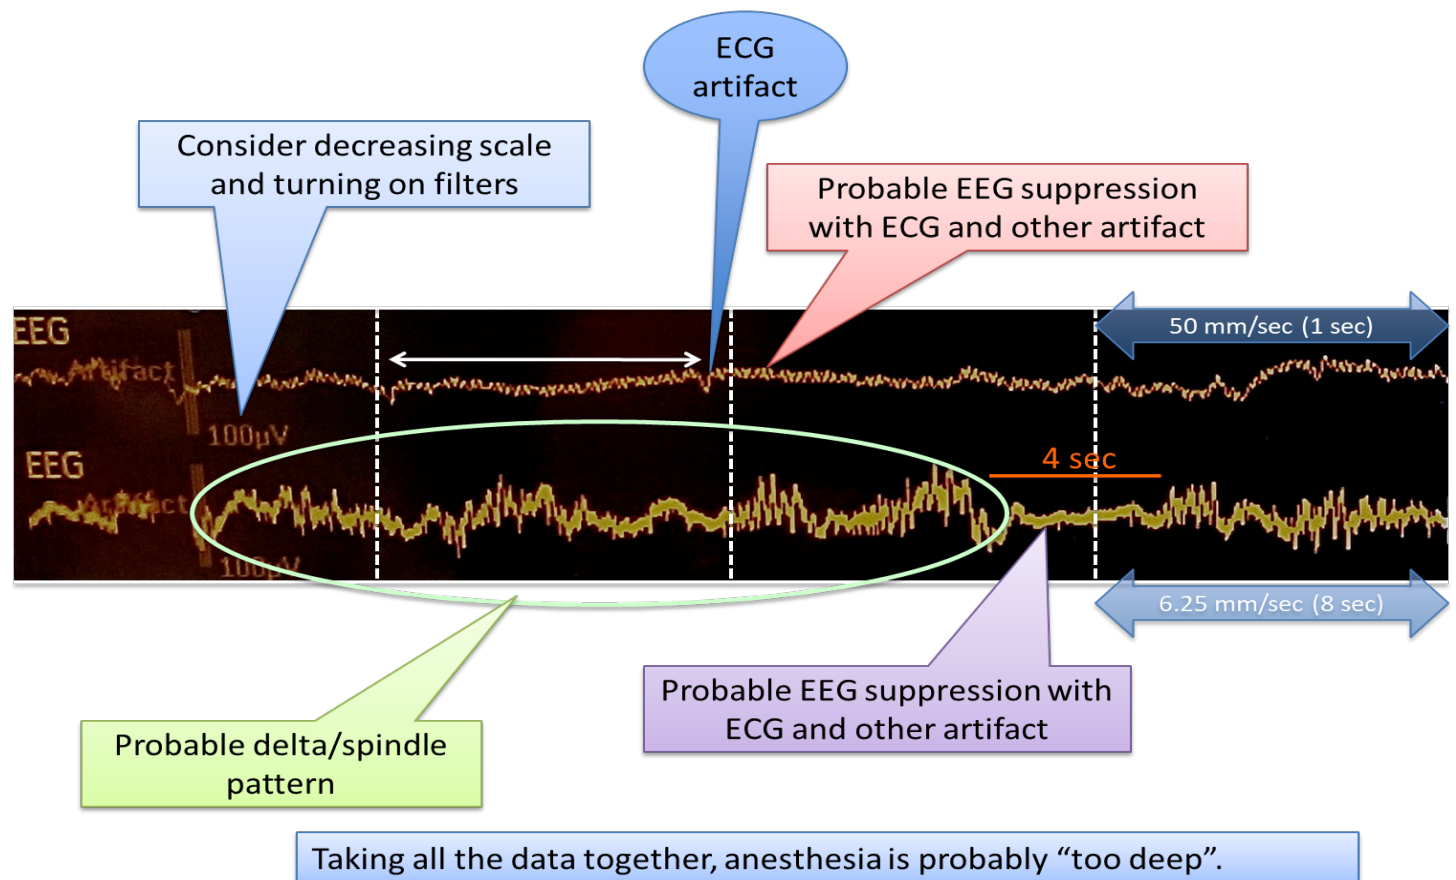



**Example 3:** An example of the real time feedback provided to the anesthesia provider in the operating room during the procedure for patients in the guided group.

Photograph of the anesthesia monitor during the procedure:

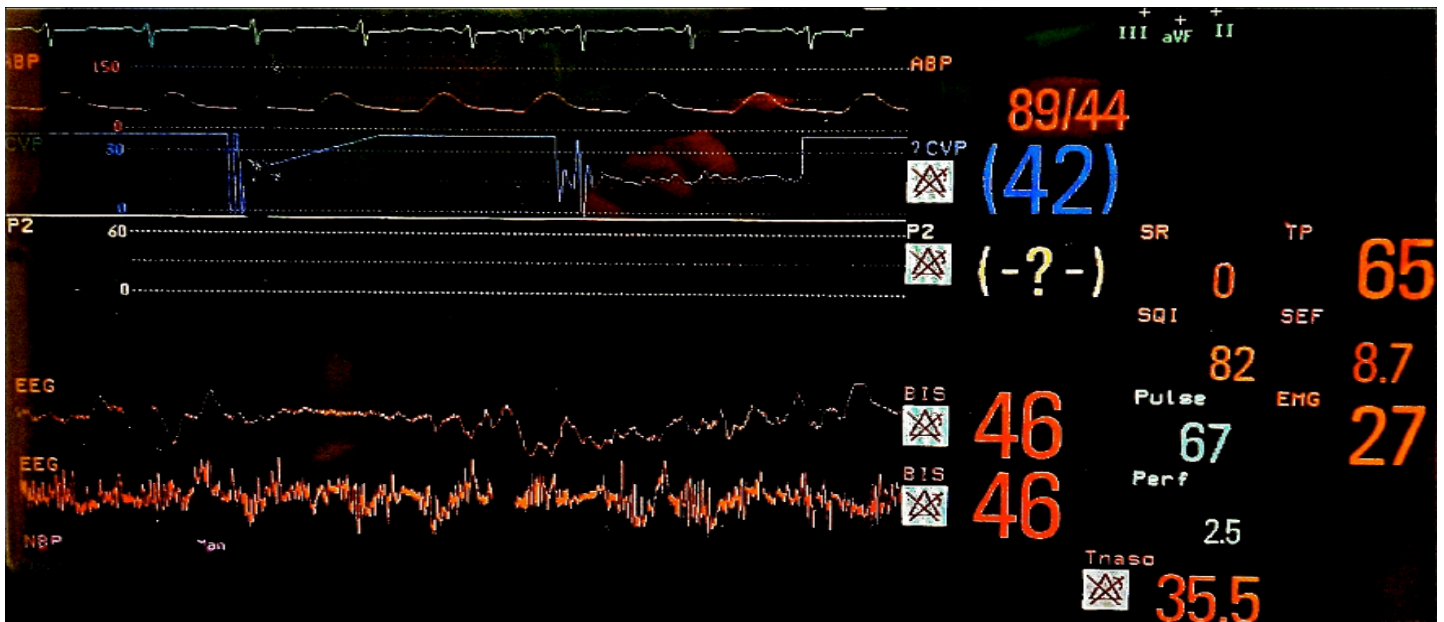

Feedback on the electroencephalogram features that was provided to the anesthesia clinicians:

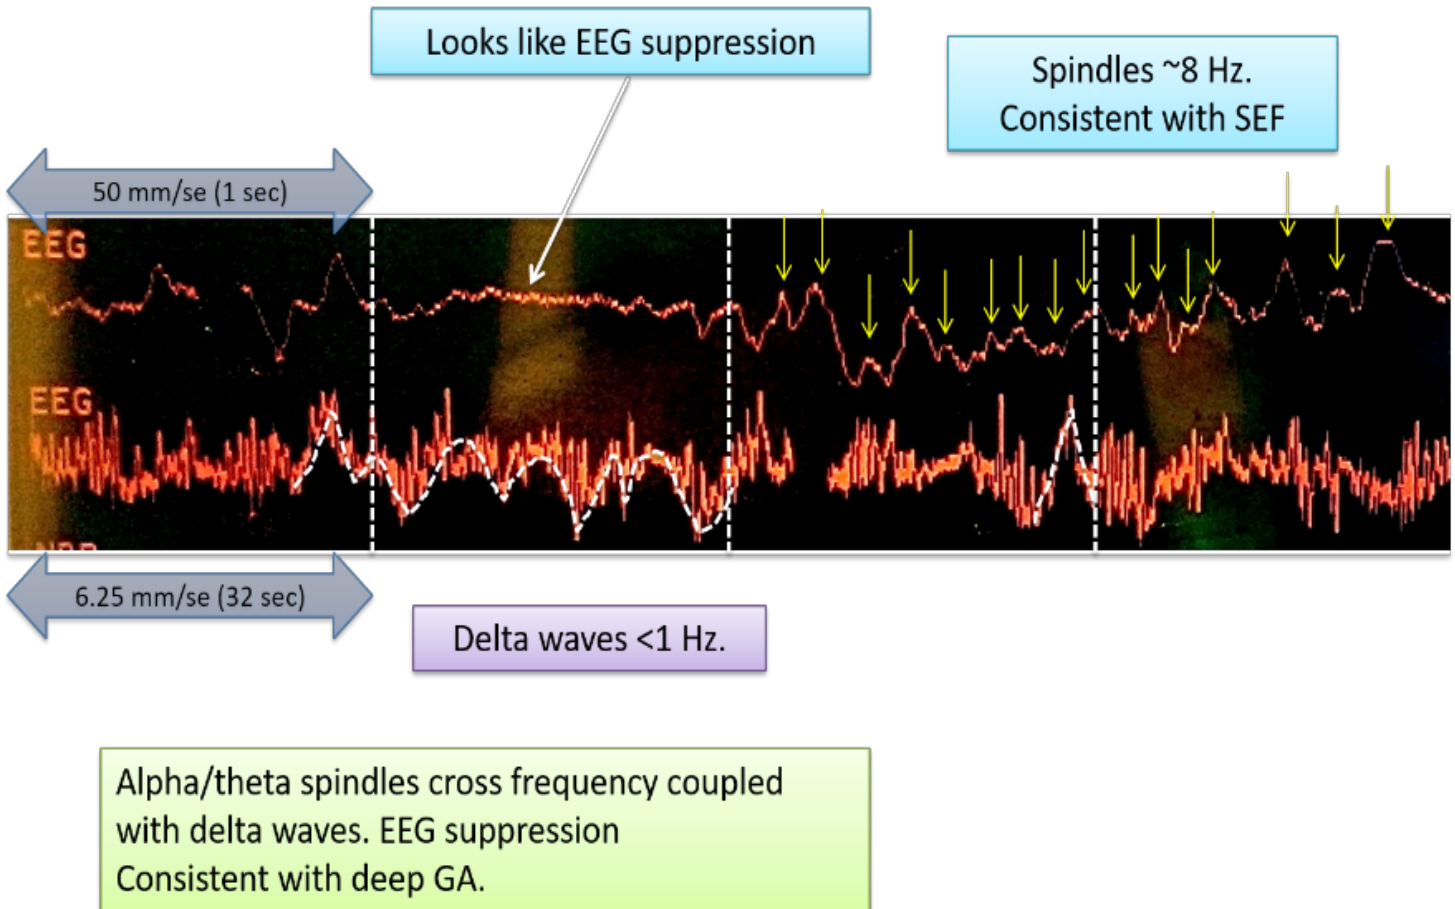

BIS, bispectral index; EMG, electromyography; GA, general anesthesia; MAC, minimum alveolar concentration; SEF, spectral edge frequency; SQI, signal quality index; SR suppression ratio; TP, total power; Hz, hertz

**eFigure3: Anesthesia Fidelity Checklist**

Fidelity checklists were provided to all anesthesia clinicians during the surgery to complete and sign. A checklist was completed for 1227 of the 1232 patients in the ENGAGES trial.

|                                                                                                                                                                                                                                                                                                                                                                                                                                                                                                                                                                                                                                                                                                                                                                                                                                                                                                                                                                                                                              |                                                                                     |                                                                                     |
|------------------------------------------------------------------------------------------------------------------------------------------------------------------------------------------------------------------------------------------------------------------------------------------------------------------------------------------------------------------------------------------------------------------------------------------------------------------------------------------------------------------------------------------------------------------------------------------------------------------------------------------------------------------------------------------------------------------------------------------------------------------------------------------------------------------------------------------------------------------------------------------------------------------------------------------------------------------------------------------------------------------------------|-------------------------------------------------------------------------------------|-------------------------------------------------------------------------------------|
| Patient enrollment ID: _____                                                                                                                                                                                                                                                                                                                                                                                                                                                                                                                                                                                                                                                                                                                                                                                                                                                                                                                                                                                                 |                                                                                     |                                                                                     |
| <b>ENGAGES</b>                                                                                                                                                                                                                                                                                                                                                                                                                                                                                                                                                                                                                                                                                                                                                                                                                                                                                                                                                                                                               |  |  |
| <b>Anesthesia Fidelity Checklist – Guided Group</b>                                                                                                                                                                                                                                                                                                                                                                                                                                                                                                                                                                                                                                                                                                                                                                                                                                                                                                                                                                          | Yes                                                                                 | No                                                                                  |
| 1. Was a quality EEG waveform visible for the duration of the case (excluding discrete periods of artifact or probe adjustment)?                                                                                                                                                                                                                                                                                                                                                                                                                                                                                                                                                                                                                                                                                                                                                                                                                                                                                             |                                                                                     |                                                                                     |
| 2. Was the EEG filter turned OFF for the duration of the surgery?                                                                                                                                                                                                                                                                                                                                                                                                                                                                                                                                                                                                                                                                                                                                                                                                                                                                                                                                                            |                                                                                     |                                                                                     |
| 3. Were you trained to interpret EEG by the ENGAGES team?                                                                                                                                                                                                                                                                                                                                                                                                                                                                                                                                                                                                                                                                                                                                                                                                                                                                                                                                                                    |                                                                                     |                                                                                     |
| 4. Did you use the EEG-guided anesthetic protocol to guide your anesthetic (only deviating from it when you thought it was clinically necessary)?                                                                                                                                                                                                                                                                                                                                                                                                                                                                                                                                                                                                                                                                                                                                                                                                                                                                            |                                                                                     |                                                                                     |
| Did the patient have any undesired intraoperative movement or breathing during the surgery?<br><input type="checkbox"/> No <span style="float: right;"><u>Frequency</u></span><br><br><input type="checkbox"/> Yes (check all that apply)<br><input type="checkbox"/> Mild: Undesired spontaneous breathing or non-purposeful movement with no impact on the surgery or patient outcome. <span style="float: right;">_____ times</span><br><input type="checkbox"/> Moderate: Movement that mildly impacted the surgery (e.g., required a pause in the surgery for coughing or straining) and required deepening of anesthesia, deepening of analgesia, or increased muscle relaxant <span style="float: right;">_____ times</span><br><input type="checkbox"/> Severe: Movement with a marked negative impact on the surgery (e.g., a patient injury, loss of sterility of the surgical field, purposeful movements suggestive of awareness, or other surgical complication) <span style="float: right;">_____ times</span> |                                                                                     |                                                                                     |
| Comments: _____                                                                                                                                                                                                                                                                                                                                                                                                                                                                                                                                                                                                                                                                                                                                                                                                                                                                                                                                                                                                              |                                                                                     |                                                                                     |
| Name: _____                                                                                                                                                                                                                                                                                                                                                                                                                                                                                                                                                                                                                                                                                                                                                                                                                                                                                                                                                                                                                  | <input type="checkbox"/> Attending<br><input type="checkbox"/> CRNA                 | <input type="checkbox"/> Fellow<br><input type="checkbox"/> Resident                |
| Signature: _____                                                                                                                                                                                                                                                                                                                                                                                                                                                                                                                                                                                                                                                                                                                                                                                                                                                                                                                                                                                                             | Date: _____                                                                         |                                                                                     |
| Name: _____                                                                                                                                                                                                                                                                                                                                                                                                                                                                                                                                                                                                                                                                                                                                                                                                                                                                                                                                                                                                                  | <input type="checkbox"/> Attending<br><input type="checkbox"/> CRNA                 | <input type="checkbox"/> Fellow<br><input type="checkbox"/> Resident                |
| Signature: _____                                                                                                                                                                                                                                                                                                                                                                                                                                                                                                                                                                                                                                                                                                                                                                                                                                                                                                                                                                                                             | Date: _____                                                                         |                                                                                     |
| Name: _____                                                                                                                                                                                                                                                                                                                                                                                                                                                                                                                                                                                                                                                                                                                                                                                                                                                                                                                                                                                                                  | <input type="checkbox"/> Attending<br><input type="checkbox"/> CRNA                 | <input type="checkbox"/> Fellow<br><input type="checkbox"/> Resident                |
| Signature: _____                                                                                                                                                                                                                                                                                                                                                                                                                                                                                                                                                                                                                                                                                                                                                                                                                                                                                                                                                                                                             | Date: _____                                                                         |                                                                                     |

EEG, electroencephalography.

Patient enrollment ID: \_\_\_\_\_

**ENGAGES**  
**Anesthesia Fidelity Checklist – Usual Care**  
**Group**

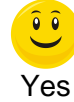

Yes

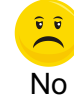

No

1. Did the BIS maintain a SQI >50 for the duration of the surgery (excluding discrete periods of artifact or probe adjustment)?

2. Was the anesthesia team blinded to all EEG data (except for SQI) for the duration of the surgery?

Did the patient have any undesired intraoperative movement or breathing during the surgery?

No

Frequency

Yes (check all that apply)

Mild: Undesired spontaneous breathing or non-purposeful movement with no impact on the surgery or patient outcome. \_\_\_\_\_ times

Moderate: Movement that mildly impacted the surgery (e.g., required a pause in the surgery for coughing or straining) and required deepening of anesthesia, deepening of analgesia, or increased muscle relaxant \_\_\_\_\_ times

Severe: Movement with a marked negative impact on the surgery (e.g., a patient injury, loss of sterility of the surgical field, purposeful movements suggestive of awareness, or other surgical complication) \_\_\_\_\_ times

Comments: \_\_\_\_\_

Name: \_\_\_\_\_

Attending

Fellow

CRNA

Resident

Signature: \_\_\_\_\_

Date: \_\_\_\_\_

Name: \_\_\_\_\_

Attending

Fellow

CRNA

Resident

Signature: \_\_\_\_\_

Date: \_\_\_\_\_

Name: \_\_\_\_\_

Attending

Fellow

CRNA

Resident

Signature: \_\_\_\_\_

Date: \_\_\_\_\_

Name: \_\_\_\_\_

Attending

Fellow

CRNA

Resident

Signature: \_\_\_\_\_

Date: \_\_\_\_\_

EEG, electroencephalography; BIS, Bispectral Index; SQI, Signal Quality Index

### eFigure4: Kaplan-Meier Curve: 30 Day Survival

Kaplan-Meier curves of 30-day survival with 95% confidence intervals (CI), by treatment groups.

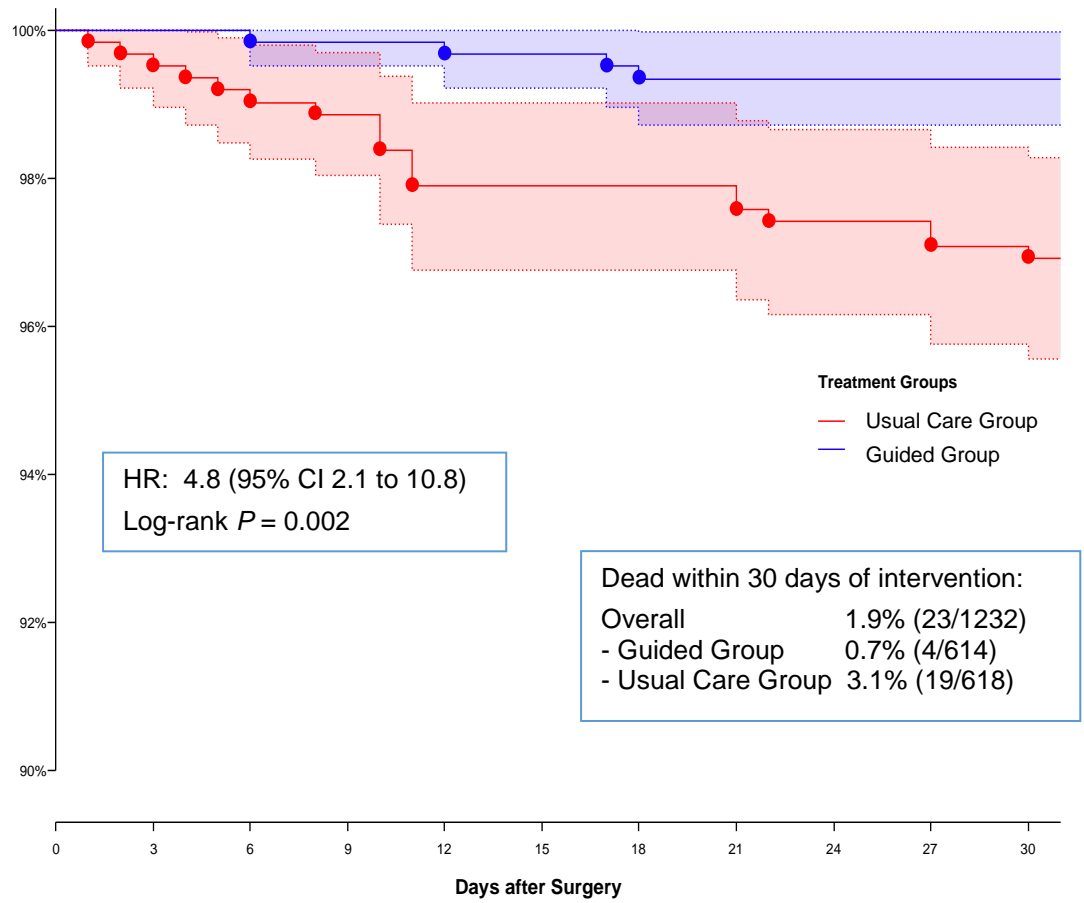

**Number at Risk**

|                  |     |     |     |     |     |     |     |     |     |     |     |
|------------------|-----|-----|-----|-----|-----|-----|-----|-----|-----|-----|-----|
| Guided Group     | 614 | 614 | 613 | 613 | 612 | 612 | 610 | 610 | 610 | 610 | 610 |
| Usual Care Group | 618 | 614 | 610 | 607 | 604 | 604 | 604 | 602 | 602 | 600 | 599 |

### eFigure5: Kaplan-Meier Curve: Cumulative Incidence of Delirium

Kaplan-Meier curves showing cumulative delirium incidence over postoperative days 1 to 5, by treatment group.

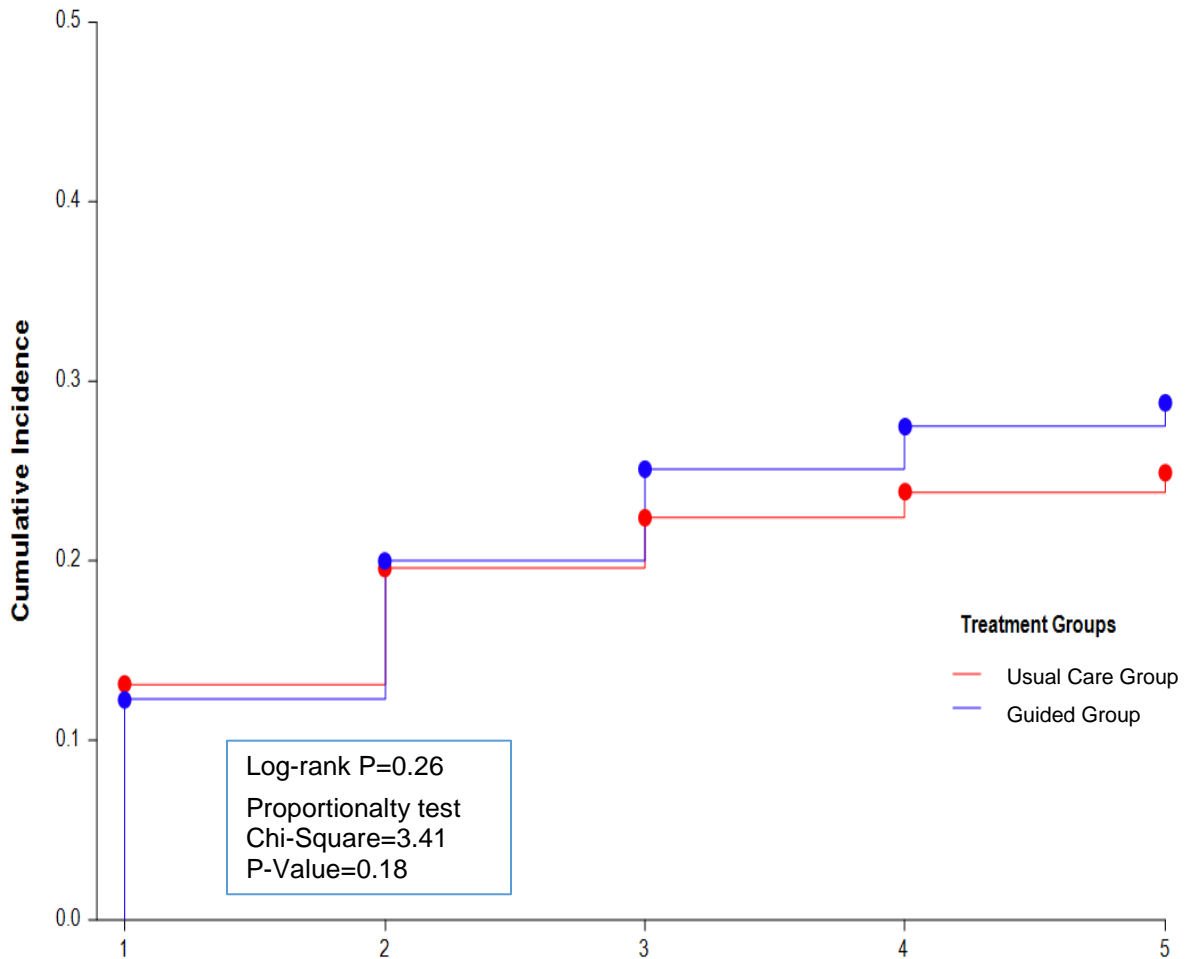

#### Number At Risk

|            | 1      | 2      | 3      | 4      | 5     |
|------------|--------|--------|--------|--------|-------|
| Guided     | 74/592 | 41/573 | 25/537 | 11/451 | 6/373 |
| Usual Care | 80/602 | 34/584 | 14/524 | 7/444  | 5/383 |

#### Percentage of Patients with Delirium by Post-operative Day

|              | Overall percentage of patients with delirium on each POD |                   |                   | Percentage of patients with new onset delirium on each POD |                   |                   |
|--------------|----------------------------------------------------------|-------------------|-------------------|------------------------------------------------------------|-------------------|-------------------|
|              | Total                                                    | Guided Group      | Usual Care Group  | Total                                                      | Guided Group      | Usual Care Group  |
|              | No./total no. (%)                                        | No./total no. (%) | No./total no. (%) | No./total no. (%)                                          | No./total no. (%) | No./total no. (%) |
| <b>POD 1</b> | 154/1194 (12.9)                                          | 74/592 (12.5)     | 80/602 (13.3)     | 154/1194 (12.9)                                            | 74/592 (12.5)     | 80/602 (13.3)     |
| <b>POD 2</b> | 146/1157 (12.6)                                          | 72/573 (12.6)     | 74/584 (12.6)     | 75/1157 (6.5)                                              | 41/573 (7.2)      | 34/584 (5.8)      |
| <b>POD 3</b> | 118/1061 (11.1)                                          | 69/537 (12.8)     | 49/524 (9.3)      | 39/1061 (3.7)                                              | 25/537 (4.7)      | 14/524 (2.7)      |
| <b>POD 4</b> | 87/895 (9.7)                                             | 51/451 (11.3)     | 36/444 (8.1)      | 18/895 (2.0)                                               | 11/451 (2.4)      | 7/444 (1.6)       |
| <b>POD 5</b> | 60/756 (7.9)                                             | 37/373 (9.9)      | 23/383 (6.0)      | 11/756 (1.5)                                               | 6/373 (1.6)       | 5/383 (1.3)       |

POD, postoperative day.

The overall number with delirium is based on the number of patients positive by CAM, CAM-ICU or chart review for that day. New delirium onset is the number of new positive patients by CAM, CAM-ICU or chart review for that day.

**eFigure6: Delirium Incidence by Comorbidity**

Incidence of postoperative delirium in the ENGAGES study segregated by Charlson Comorbidity Index

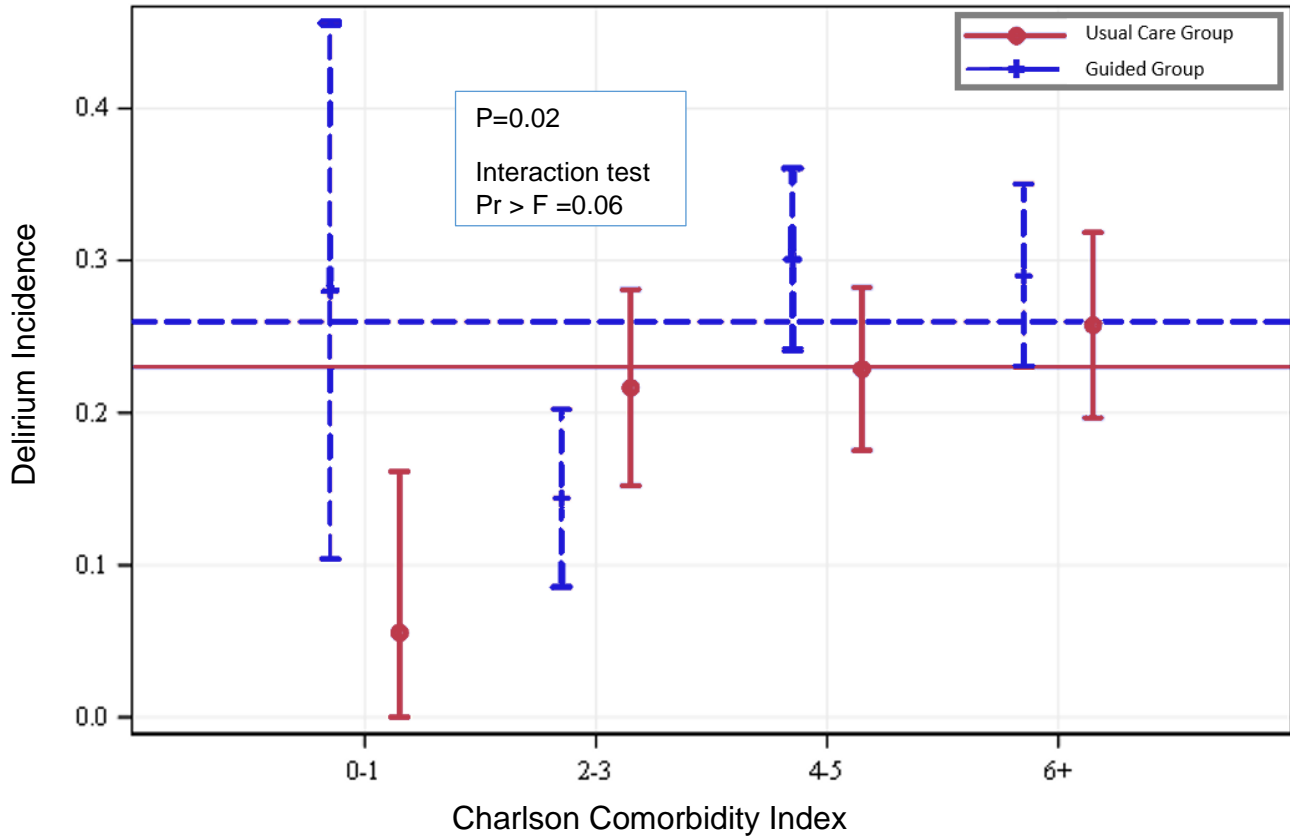

Supplement: jama-321-473-s003.pdf [file jama-321-473-s003.pdf]
