# Supplementary material
Source: PubMed Central journal article supplement (PMC6439616)
Supplement: jama-321-473-s001.pdf [file jama-321-473-s001.pdf]

## Supplementary Online Content

Wildes T, Mickle AM, Ben Abdallah A. Effect of electroencephalography-guided anesthetic administration on postoperative delirium among older adults undergoing major surgery [published February 2, 2019]. *JAMA*. doi:10.1001/jama.2018.22005

Supplement 1. Study protocol and statistical analysis plan

This supplementary material has been provided by the authors to give readers additional information about their work.

1 |  
2 | **Protocol for the Electroencephalography Guidance of Anesthesia to Alleviate Geriatric Syndromes**  
3 | **(ENGAGES) Study: a Pragmatic, Randomized Clinical Trial**  
4 |  
5 |

6 Wildes TS, Winter AC, Maybrier HR, Mickle AM, Lenze E, Stark S, Lin N, Inouye SK, Schmitt E, McKinnon S,  
7 Muench MR, Murphy MR, Upadhyayula RT, Fritz BA, Escallier KE, Apakama GP, Emmert D, Graetz TJ,  
8 Stevens T, Palanca, BJ, Huneke R, Melby S, Torres B, Leung J, Jacobsohn E, Avidan MS\*

9  
10 \*To whom correspondence should be addressed  
11 Washington University School of Medicine  
12 Campus Box 8054  
13 660 South Euclid Avenue  
14 St. Louis, MO 63110  
15

16  
17 Hebrew Rehabilitation Center  
18

19 Acknowledgements:

20 Will Godfrey, Furqaan Sadiq, Nicole Shin, Rachel Steinhorn, Laura Veremakis, Maxim Wolfson, Guoquan Xu,  
21 Melissa Milbrandt, Phil Vlisides, George Mashour, Stacey Dahm, Emily Somerville, Aamil Patel, Jamila Burton,  
22 Jennifer Tappenden, Catherine Tedeschi, Sharon Jiang, Jenny Zhao Cheng, Victoria Cui, Yulong Chen.  
23

24 Version: Original July 4, 2014  
25 Amendment 1: December 22, 2014  
26 Amendment 2: January 24, 2015  
27 Amendment 3: February 12, 2015  
28 Amendment 4: April 10, 2015  
29 Amendment 5: May 31, 2015  
30 Amendment 6: June 24, 2015  
31 Amendment 7: September 1, 2015  
32 Amendment 8: November 10, 2015  
33 Amendment 9: December 21, 2015  
34

35  
36 NCT02241655  
37

38 Funding for the ENGAGES trial was through a UH2/UH3 mechanism grant awarded by the National Institute  
39 on Aging (1UH2AG050312-01 and 4 UH3 AG050312-02). Funding for the SATISFY-SOS study was from a  
40 grant awarded by the Barnes-Jewish Hospital Foundation Award Reference Number 7937-77 and support  
41 provided by the Department of Anesthesiology at Washington University. In addition, resources for this study  
42 and the time of Drs. Inouye and Schmitt were covered in part by grants No.P01AG031720, K07AG041835 and  
43 R01AG044518.  
44

**Co-Authors:**

Daniel Emmert, MD PhD  
Department of Anesthesiology  
Washington University School of Medicine  
St. Louis, Missouri

Krisztina Escallier, MD  
Department of Anesthesiology  
Washington University School of Medicine  
St. Louis, Missouri

Bradley Fritz, MD MSCI  
Department of Anesthesiology  
Washington University School of Medicine  
St. Louis, Missouri

Thomas Graetz, MD  
Department of Anesthesiology  
Washington University School of Medicine  
St. Louis, Missouri

Rocco Hueneke, MD  
Department of Anesthesiology  
Washington University School of Medicine  
St. Louis, Missouri

Eric Lenze, MD  
Department of Psychiatry  
Washington University School of Medicine  
St. Louis, Missouri

Nan Lin, PhD  
Department of Mathematics, Biostatistics Division  
Washington University in St. Louis  
St. Louis, Missouri

Hannah Maybrier  
Department of Anesthesiology  
Washington University School of Medicine  
St. Louis, Missouri

Ben Palanca, MD PhD MSc  
Department of Anesthesiology  
Washington University School of Medicine  
St. Louis, Missouri

Sherry McKinnon, BS  
Department of Anesthesiology  
Washington University School of Medicine  
St. Louis, Missouri

Spencer Melby, MD  
Department of Surgery, Cardiothoracic Division  
Washington University School of Medicine  
St. Louis, Missouri

Maxwell Muench  
Department of Anesthesiology  
Washington University School of Medicine  
St. Louis, Missouri

Angela Mickle, MS  
Department of Anesthesiology  
Washington University School of Medicine  
St. Louis, Missouri

Matthew Murphy  
Department of Anesthesiology  
Washington University School of Medicine  
St. Louis, Missouri

Ginika Apakama, MD  
Department of Anesthesiology  
Washington University School of Medicine  
St. Louis, Missouri

Susan Stark, PhD  
Department of Occupational Therapy, Department of Neurology  
Washington University Institute for Public Health, School of Medicine  
St. Louis, Missouri

Tracey Wagner Stevens, MD  
Department of Anesthesiology  
Washington University School of Medicine  
St. Louis, Missouri

Brian Torres, MSN, CRNA  
Department of Anesthesiology  
Washington University School of Medicine  
St. Louis, Missouri

Ravi Upadhyayula  
Department of Anesthesiology  
Washington University School of Medicine  
St. Louis, Missouri

Troy Wildes, MD  
Department of Anesthesiology  
Washington University School of Medicine  
St. Louis, Missouri

Anke C. Winter, MD, MSc  
Division of Public Health Sciences  
Department of Surgery

Washington University School of Medicine  
St. Louis, Missouri

Michael Avidan, MBBCh  
Department of Anesthesiology  
Washington University School of Medicine  
St. Louis, Missouri

Eric Jacobsohn, MBChB, MHPE, FRCPC  
Department of Anesthesia  
University of Manitoba/Winnipeg Regional Health Authority Anesthesia  
Program  
Winnipeg, Manitoba, Canada

Jacqueline Leung, MD,  
Department of Anesthesia & Perioperative Care  
University of California San Francisco  
San Francisco, California

Sharon K. Inouye, MD, MPH  
Department of Medicine, Beth Israel Deaconess Medical Center,  
Harvard Medical School; and Institute for Aging Research, Hebrew  
SeniorLife;  
Boston, Massachusetts

Eva M. Schmitt, PhD  
Institute for Aging Research, Hebrew SeniorLife;  
Boston, Massachusetts

45  
46  
47  
48

49  
50  
51

## WORLD HEALTH ORGANIZATION DATA SET

|                                                      |                                                                                                                                                                                                                                                             |
|------------------------------------------------------|-------------------------------------------------------------------------------------------------------------------------------------------------------------------------------------------------------------------------------------------------------------|
| <b>Primary Registry and Trial Identifying Number</b> | ClinicalTrials: NCT02241655                                                                                                                                                                                                                                 |
| <b>Date of Registration</b>                          | September 2014                                                                                                                                                                                                                                              |
| <b>Secondary Identifying Numbers</b>                 | IRB ID#: 201407128                                                                                                                                                                                                                                          |
| <b>Source(s) of Monetary Support</b>                 | National Institute on Aging Grant (Award Reference Number 1UH2AG050312-01 and 4 UH3 AG050312-02) and Barnes Jewish Hospital Foundation Grant (Award Reference Number 7937-77)                                                                               |
| <b>Primary Sponsor</b>                               | Department of Anesthesiology - Washington University School of Medicine in St. Louis, MO                                                                                                                                                                    |
| <b>Secondary Sponsor(s)</b>                          | Hebrew Rehabilitation Center – Hebrew Senior Life in Boston, MA                                                                                                                                                                                             |
| <b>Role of Sponsors</b>                              | Sponsors did not contribute to any intellectual study design, collection, management, analysis or interpretation of the data and have no authority over these activities                                                                                    |
| <b>Contact for Public Queries</b>                    | Michael Avidan, MBCh<br>avidanm@anest.wustl.edu<br>314-747-4155<br>660 S. Euclid Ave<br>Department of Anesthesiology<br>Washington University School of Medicine<br>St. Louis, MO 63110<br>United States                                                    |
| <b>Contact for Scientific Queries</b>                | Michael Avidan, MBCh<br>Study Principal Investigator<br>avidanm@anest.wustl.edu<br>314-747-4155<br>Campus Box 8054<br>660 S. Euclid Ave<br>Department of Anesthesiology<br>Washington University School of Medicine<br>St. Louis, MO 63110<br>United States |
| <b>Public Title</b>                                  | Protocol for the Electroencephalography Guidance of Anesthesia (ENGAGES) Study                                                                                                                                                                              |
| <b>Scientific Title</b>                              | Protocol for the Electroencephalography Guidance of Anesthesia to Alleviate Geriatric Syndromes (ENGAGES)                                                                                                                                                   |

CONFIDENTIAL: This document is the intellectual property the ENGAGES research group. Acceptance of this document constitutes the agreement by the recipient that no unpublished information contained herein will be published or disclosed without prior written approval.

|                                                  |                                                                                                                                                                                                                                                                                                                                                                                                                                                                                                                                                                                                                                                                                                                                                                                                                                                                                                                                                                                                                                                                                                                           |
|--------------------------------------------------|---------------------------------------------------------------------------------------------------------------------------------------------------------------------------------------------------------------------------------------------------------------------------------------------------------------------------------------------------------------------------------------------------------------------------------------------------------------------------------------------------------------------------------------------------------------------------------------------------------------------------------------------------------------------------------------------------------------------------------------------------------------------------------------------------------------------------------------------------------------------------------------------------------------------------------------------------------------------------------------------------------------------------------------------------------------------------------------------------------------------------|
|                                                  | Study: a Pragmatic, Randomized Clinical Trial                                                                                                                                                                                                                                                                                                                                                                                                                                                                                                                                                                                                                                                                                                                                                                                                                                                                                                                                                                                                                                                                             |
| <b>Countries of Recruitment</b>                  | United States                                                                                                                                                                                                                                                                                                                                                                                                                                                                                                                                                                                                                                                                                                                                                                                                                                                                                                                                                                                                                                                                                                             |
| <b>Health Condition(s) or Problem(s) Studied</b> | Postoperative delirium, postoperative health-related quality of life, postoperative falls                                                                                                                                                                                                                                                                                                                                                                                                                                                                                                                                                                                                                                                                                                                                                                                                                                                                                                                                                                                                                                 |
| <b>Intervention(s)</b>                           | <p>Study arm 1: EEG-Guided Anesthesia (primary intervention)<br/>The practitioners caring for patients in the intervention group will use the raw EEG waveform as well as processed EEG indices intraoperatively to guide anesthetic administration. Specifically they will attempt to limit epochs of EEG burst suppression and try to use the information provided by the EEG to safely decrease anesthetic administration.</p> <p>Study arm 2: Routine Anesthetic Care (Control Group) Clinicians will not be able to view the EEG-based data. Anesthesia clinicians will use routine care to determine appropriate administration of anesthesia.</p> <p>Falls prevention (secondary intervention):<br/>At the time of enrollment all patients will receive information on improving the safety of their home environment and on tips to improve safety in the hospital after surgery. Patients who report that they have fallen in the six months prior to surgery may receive a home visit from an occupational therapist, who will make specific recommendations to improve the safety of the home environment.</p> |
| <b>Key Inclusion and Exclusion Criteria</b>      | <p>Inclusion Criteria<br/>a) Adults older than 60; b) competent to provide informed consent; c) undergoing major elective surgery requiring a minimum stay of 2 days postoperatively (e.g., major open cardiac, thoracic, vascular, intra-abdominal, gynecologic, urologic, orthopedic, hepato-biliary and ear, nose and throat surgery) d) enrolled in the SATISFY-SOS study</p> <p>Exclusion Criteria<br/>a) Unable to provide informed consent; b) undergoing neurosurgical procedures; c) preoperative delirium; d) unable to participate adequately in delirium screening including those who are blind, deaf, illiterate or not fluent in English; e) history of intraoperative awareness f) additional surgery planned within five days of index surgery</p>                                                                                                                                                                                                                                                                                                                                                       |
| <b>Study Type</b>                                | <p>Interventional<br/>Allocation: randomized<br/>Intervention model: parallel assignment<br/>Blinding: anesthesia practitioner not blinded to intervention, subject blinded to intervention, primary outcome assessor blinded to intervention</p>                                                                                                                                                                                                                                                                                                                                                                                                                                                                                                                                                                                                                                                                                                                                                                                                                                                                         |

Assignment: parallel  
Primary purpose: prevention

**Date of First Enrollment** January 2015

**Target Sample Size** 1232

○ **Recruitment Status** Enrolling

**Primary Outcome(s)** Outcome name: incidence of postoperative delirium  
Method of measurement: Delirium assessment with: Either the Confusion Assessment Method or the Confusion Assessment Method for the ICU coupled with the Inouye Delirium Chart Review Method  
Time points of interest: from date of randomization up to 5 days postoperatively

**Key Secondary Outcomes** Outcome name: postoperative health related quality of life  
Method of measurement: Veteran's RAND 12-item Health Survey  
Time points of interest: 30 days and 1 year postoperatively  
Outcome name: postoperative incidence of falls  
Method of measurement: ProFaNE falls questions  
Time points of interest: 30 days and 1 year postoperatively

52  
53  
54



## ORGANIZATIONAL STRUCTURE AND RESPONSIBILITIES

### Principal Investigator:

Michael Avidan, MBBCh

Responsibilities include: design and conduct of the ENGAGES trial, preparation of protocol and revisions, organizing steering committee meetings, and publication of study reports.

### Steering Committee:

|                       |                        |                           |
|-----------------------|------------------------|---------------------------|
| Michael Avidan, MBBCh | Daniel Emmert, MD, PhD | Sharon K. Inouye, MD, MPH |
| Troy Wildes, MD       | Rocco Hueneke, MD      | Eva M. Schmitt, PhD       |
| Eric Lenze, MD        | Tracey Stevens, MD     | Brian Torres, CRNA        |
| Susan Stark, PhD      | Thomas J. Graetz, MD   | Spencer Melby, MD         |
| Eric Jacobsohn, MBChB | Jacqueline Leung, MD   |                           |

Responsibilities include: agreement of final protocol, reviewing progress of study and if necessary, changes to the protocol, coordinating with principle investigator, and communicating with trial management committee.

### Operations Committee:

Michael Avidan, MBBCh  
Sherry McKinnon  
Hannah Maybrier  
Angela Mickle  
Matthew Murphy  
Ravi Upadhyayula  
Ginika Apakama  
George Mashour  
Jacqueline Leung  
Eric Jacobsohn

Responsibilities include: study planning, organization of steering committee meetings, provides annual risk report to the Human Research Protection Office at Washington University, reports SAEs (Serious Adverse Events) to Washington University IRB (Institutional Review Board), responsible for maintenance of REDCap electronic database, reporting to steering committee, ethics committee applications, data verification, recruitment, randomization, and follow-up of study participants

### Data Management Committee:

Anke Winter, MD, MSc  
Nan Lin, PhD

Responsibilities include: statistical design of study, data verification.

### Data Adjudication Committee:

Michael Avidan, MBBCh  
Eric Lenze, MD  
Troy Wildes, MD  
Eva Schmitt, PhD  
Sharon K. Inouye, MD, MPH  
Guoquan Xu, MD, PhD

Responsibilities include: regularly reviewing delirium assessments, contacting trial management committee, retraining researchers if necessary.

**Data and Safety Monitoring Committee:**

Heather Gwynn Allore, M.S., PhD - Yale University  
Donna Marie Fick, PhD, FGSA, FAAN - Pennsylvania State University  
Charles W. Hogue, Jr., MD - Johns Hopkins University School of Medicine  
Pratik Pandharipande, MD – Vanderbilt University Medical Center  
Frederick Sieber, MD - Johns Hopkins Hospital

**Safety Officer:**

Charles Brown, MD- Johns Hopkins University School of Medicine

Responsibilities include: reviewing and evaluating the study data to ensure participant safety, study conduct, progress, and efficacy, and making recommendations regarding the continuation, modification, and termination of the trial.

55  
56 **INTRODUCTION:** Postoperative delirium, arbitrarily defined as occurring within five days of surgery, affects up  
57 to 50% of patients older than sixty after a major operation. This geriatric syndrome is associated with longer  
58 intensive care unit and hospital stay, readmission, persistent cognitive deterioration, and mortality. No effective  
59 preventive methods have been identified, but preliminary evidence suggests that electroencephalography  
60 (EEG) monitoring during general anesthesia, by facilitating reduced anesthetic exposure and EEG suppression,  
61 might decrease incident postoperative delirium. This study hypothesizes that EEG-guidance of anesthetic  
62 administration prevents postoperative delirium and downstream sequelae, including falls and decreased quality  
63 of life.

64  
65 **METHODS AND ANALYSIS:** This is a 1,232 patient, block-randomized, double-blinded, comparative  
66 effectiveness trial. Patients older than sixty, undergoing volatile agent-based general anesthesia for major  
67 surgery, are eligible. Subjects are randomized to one of two anesthetic approaches. One group receives  
68 general anesthesia with clinicians blinded to EEG monitoring. The other group receives EEG-guidance of  
69 anesthetic agent administration. The outcomes of postoperative delirium ( $\leq 5$  days), falls ( $\leq 1$  month) and health-  
70 related quality of life (1 month) will be compared between groups. Postoperative delirium is assessed with the  
71 Confusion Assessment Method, falls with ProFaNE consensus questions, and quality of life with the Veteran's  
72 RAND 12-item Health Survey. The intention-to-treat principle will be followed for all analyses. Differences

73 between groups will be presented with 95% confidence intervals, and will be considered statistically  
74 significant at a two-sided  $p < 0.05$ .

75

76 **ETHICS AND DISSEMINATION:** ENGAGES is approved by the ethics board at Washington University.

77 Recruitment began in January 2015. Dissemination plans include presentations at scientific conferences,

78 scientific publications, internet-based educational materials, and mass media.

79 **REGISTRATION DETAILS:** ENGAGES is registered on clinicaltrials.gov, NCT02241655 (updated February

80 2015).

81

82

### 83 **Strengths**

- 84 • The ENGAGES study is a pragmatic clinical trial, conducted in a real world clinical setting.
- 85 • The study will enroll older patients, who are under-studied in clinical research.
- 86 • The primary outcome, postoperative delirium, is important to patients, healthcare providers and society.
- 87 • The electroencephalography-guided anesthetic protocol is straightforward and inexpensive; it would be  
88 feasible to disseminate and implement broadly.
- 89 • The study utilizes reliable and granular data from the perioperative electronic medical record and  
90 incorporates data from a large registry of postoperative patient reported outcomes.

91

### 92 **Limitations**

- 93 • A single clinical trial should seldom be regarded as definitive; if the results of this trial do suggest that  
94 EEG-guidance of anesthesia decreases postoperative delirium, it will be necessary to replicate this  
95 finding in future studies.
- 96 • While patients and those assessing the primary outcome are blinded, the inability to blind clinicians to  
97 the trial allocation group is a potential source of bias and confounding.
- 98 • The effectiveness of the electroencephalography-guided anesthetic protocol will depend on clinicians'  
99 adherence to the protocol.
- 100 • As delirium is a fluctuating disorder, it may occasionally be missed despite rigorous and validated  
101 assessment methods.
- 102 • Some patients might be unable to speak in the early postoperative period (e.g. have a tracheal tube in  
103 place), which will curtail the sensitivity of delirium assessment.

104

105 **Background**

106  
107 Within the next forty years, >110 million Americans will exceed the age of 60,<sup>1</sup> and many of them (>40%) will  
108 require elective surgery.<sup>2</sup> The geriatric syndrome of postoperative delirium is one of the most common  
109 complications observed with the physiological stress of major surgery and anesthesia. It affects up to 70% of  
110 surgical patients older than 60, with most studies showing an incidence of 30% to 50%.<sup>3</sup> Delirium is an acute  
111 and fluctuating neurologic disorder that reflects a change from baseline cognition and is characterized by the  
112 cardinal features of inattention and disorganized thinking.<sup>4</sup> Postoperative delirium typically first manifests  
113 between 24 and 96 hours following the surgical intervention. While it is unclear why postoperative delirium  
114 occurs so frequently, consistently described risk factors for delirium include older age, male sex, mild cognitive  
115 impairment, dementia, sensory impairment, and chronic medical illness.<sup>5</sup>

116  
117 Postoperative delirium has substantial implications at a societal level, for healthcare professionals and for  
118 individual patients and their families. It is estimated that delirium is associated with additional healthcare costs  
119 exceeding \$60,000 per patient per year.<sup>6</sup> Both the occurrence and the duration of delirium are linked with  
120 increased morbidity and mortality, prolonged length of hospital and intensive care unit (ICU) stay, as well as  
121 functional and cognitive decline necessitating nursing home or long-term care facility placement.<sup>7-10</sup>  
122 Preoperative surveys completed by 1,000 patients at our institution, Barnes-Jewish Hospital, a tertiary care  
123 facility at Washington University in St. Louis, showed that approximately 40% of surgical patients highlight  
124 postoperative delirium (or acute confusion) as one of their top concerns, and 30% of all patients are worried  
125 that they will still have problems thinking normally when they return home to recover. Another survey study  
126 showed that, when in-hospital delirium occurs, patients' family members are deeply affected by both the acute  
127 neurologic deterioration and the impact upon recovery.<sup>11</sup>

128  
129 Delirious patients are unable to participate effectively in rehabilitation and are therefore susceptible to other  
130 postoperative geriatric syndromes and adverse events, including falls, pressure ulcers, functional decline,  
131 pneumonia, hospital readmission, and discharge to a nursing home or extended care facility.<sup>8,12-16</sup> There is  
132 even evidence that patients who have periods of delirium while in hospital may continue to experience  
133 persistent delirium after going home and among these patients, the risks of mortality, institutionalization, and  
134 functional and cognitive decline are even worse than those patients who experienced delirium but recovered.<sup>17</sup>  
135 Patients who experience postoperative delirium report persistently decreased quality of life.<sup>8</sup> Furthermore,  
136 additional studies suggest that incidence and duration of delirium may be associated with long-term  
137 postoperative cognitive dysfunction.<sup>18,19</sup> It is therefore a public health priority to test plausible interventions to  
138 prevent, identify and treat postoperative delirium.

139  
140 Even though postoperative delirium is a pressing healthcare concern, there are barriers to making progress in  
141 its prevention and treatment. Delirium is difficult to diagnose as most patients with delirium are hypoactive or  
142 lethargic,<sup>20</sup> while medical staff typically recognize delirium when patients are hyperactive and agitated.  
143 Hypoactive characteristics may also be easily regarded as a normal phenotype in a patient recovering from  
144 surgery or general anesthesia. Furthermore, no group of healthcare practitioners involved in the direct surgical  
145 care of patients has taken ownership of delirium as a priority needing their attention. It is not currently standard  
146 of care to routinely assess surgical patients for delirium, approaches for preventing postoperative delirium have  
147 not been applied to surgical patients, and treatment options for delirium are limited. Delirium is a common  
148 complication of surgery and anesthesia with serious consequences for patients and their families, yet it  
149 remains an orphan problem and no effective prophylactic or curative treatments for postoperative delirium have  
150 been identified.

151  
152 Detecting delirium routinely in surgical patients using a validated and practical approach like the Confusion  
153 Assessment Method (CAM),<sup>21</sup> could allow target therapies and potentially improve outcomes. For example, the  
154 Hospital Elder Life Program (HELP)<sup>22,23</sup> has been demonstrated to be effective for prevention of postoperative  
155 delirium, and principles and protocols from this program will be utilized in the proposed study. In addition,  
156 although the effectiveness of the Acute Care for Elders model has not yet been evaluated in the postoperative  
157 setting, delirious patients could be targeted to receive components of this model (frequent medical review,

158 early rehabilitation, early discharge planning, prepared environment, patient-centered care), all of which have  
159 been shown to decrease geriatric syndromes, such as falls, in vulnerable patients.<sup>24,25</sup> Identifying and if  
160 possible preventing delirium in surgical patients might present an important opportunity to improve numerous  
161 outcomes beyond a reduction in the delirium burden.  
162

163 Although it is very likely that anesthetic management contributes to the occurrence of postoperative delirium, to  
164 date there are no validated anesthetic approaches to preventing delirium. Four randomized, controlled studies  
165 in diverse surgical settings have suggested a decrease in postoperative delirium with bispectral index (BIS)  
166 guidance of general anesthesia.<sup>26-29</sup> The BIS is one of several proprietary electroencephalogram (EEG) indices  
167 of anesthetic depth, based on EEG waveform processing, with numbers approaching 100 suggesting arousal  
168 or wakefulness, and numbers approaching 0 reflecting absent detectable brain electrical activity.<sup>30</sup> A meta-  
169 analysis of these four randomized controlled trials showed that EEG (or BIS) guidance of anesthesia was  
170 associated with a marked reduction in postoperative delirium with a pooled odds ratio of 0.56 (95% CI, 0.42–  
171 0.73, heterogeneity P value = 0.54).<sup>29</sup> Also of interest are several studies that have examined the relationship  
172 between low intraoperative BIS values and intermediate term postoperative mortality.<sup>31-35</sup> Building on these a  
173 study has demonstrated that intraoperative EEG burst suppression specifically, especially when coinciding with  
174 hypotension, is associated with increased 90-day postoperative mortality.<sup>36</sup>  
175

176  
177 Figure 1: Stylized common electroencephalograph (EEG) patterns from frontal EEG channel seen with  
178 progressively increasing anesthetic depth. BIS, bispectral index  
179

180 Despite the findings from these studies and recommendations from the National Institute for Health and Care  
181 Excellence in the United Kingdom that electroencephalography guidance of anesthesia should be routine for  
182 vulnerable patients,<sup>37</sup> intraoperative EEG monitoring has not become standard anesthetic practice, and there is  
183 ongoing controversy about the utility of electroencephalography guidance of anesthesia.<sup>38</sup> For example, in the  
184 United Kingdom only 2% of anesthesia practitioners routinely incorporate EEG monitoring in their practice,<sup>39</sup>  
185 and it is possible that adoption is similarly low in the United States. The results of several clinical trials have led  
186 anesthesia practitioners to question whether EEG-guidance meaningfully changes anesthetic administration in  
187 real world settings,<sup>40-42</sup> and the mechanisms by which EEG-guidance could decrease postoperative delirium  
188 have not been clarified. In the United States, the American Society of Anesthesiologists in its most recent  
189 guidelines on brain monitoring does not recommend EEG monitoring as standard care for any patient  
190 population, procedure or anesthetic technique.<sup>43</sup> A pragmatic, randomized clinical trial would address this  
191 controversy and could help to inform the standard of care going forward. The plausibility for EEG-guidance  
192 preventing postoperative delirium is that it might help practitioners to avoid excessive anesthetic administration  
193 to vulnerable patients.<sup>44</sup> During general anesthesia, BIS values <30 are usually reflective of periods of EEG  
194 burst suppression,<sup>45,46</sup> which is often indicative of excessively deep anesthesia (See Figure 1). One study  
195 found a specific association between low BIS values and postoperative delirium, and the investigators  
196 hypothesized that burst suppression could be linked to postoperative delirium.<sup>28</sup> An observational study in  
197 cardiac surgery patients reported an association between intraoperative burst suppression and postoperative  
198 delirium<sup>47</sup>, and similarly EEG suppression in critically ill patients reportedly predicts post-coma delirium.<sup>48</sup> Both  
199 EEG burst suppression and low BIS values have sometimes been shown to be associated with intermediate  
200 term mortality after surgery and critical illness.<sup>31-36,49,50</sup> The proposed Electroencephalography Guidance of  
201 Anesthesia to Alleviate Geriatric Syndromes (ENGAGES) study is designed as a parallel group, pragmatic,  
202 superiority trial to test whether a simple EEG-guided protocol, designed to minimize epochs of low BIS values  
203 and EEG burst suppression, prevents postoperative delirium as well as its downstream public health sequelae,  
204 such as deterioration in health-related quality of life and injurious falls. The ENGAGES study has three main  
205 hypotheses: 1) EEG-guidance of anesthesia is effective in preventing delirium; 2) through prevention of  
206 delirium, EEG-guided anesthesia prevents postoperative falls and improves patient reported quality of life; and  
207 3) providing a targeted safety intervention will prevent postoperative falls.  
208

## 209 **Methods**

210

211 Research Design Overview (See Figure 2)

212 The Human Research Protection Office at Washington University School of Medicine has approved the study.  
213 This protocol, which details the design of the ENGAGES study, includes all the elements elaborated in the  
214 SPIRIT (Standard Protocol Items: Recommendations for Interventional Trials) checklist.<sup>51,52</sup> The ENGAGES  
215 study will be a pragmatic randomized clinical trial enrolling 1,232 patients 60 years and older who will undergo  
216 elective major surgery at Barnes Jewish Hospital, St. Louis, MO. This hospital is an academic medical center  
217 in the Midwestern United States, which is affiliated to Washington University School of Medicine and serves a  
218 diverse range of patients in St. Louis and its environs. Eligible patients will often be recruited through the  
219 Center for Preoperative Assessment and Planning (CPAP) clinic at Barnes Jewish Hospital. Surgical patients  
220 might also be enrolled on hospital wards prior to their surgery. Participants will be randomly assigned to  
221 receive the electroencephalography-guided protocol or routine care. Assessments will be conducted at  
222 baseline, in the postoperative period during the hospital stay, at 30 days and at 1-year post-surgery. The  
223 primary outcome measure will be the incidence of postoperative delirium. During the 1-year follow-up period,  
224 health-related quality of life information and information on incident falls will be collected. At Washington  
225 University, surgical patients have been enrolled in the **S**ystematic **A**ssessment and **T**argeted **I**mprovement of  
226 **S**ervices **F**ollowing **Y**early **S**urgical **O**utcomes **S**urveys (SATISFY-SOS - NCT02032030) study since 2012. For  
227 the exploratory aim 3, there will be a prospective comorbidity-matched cohort study using the ENGAGES  
228 clinical trial population and reference subjects from the ongoing SATISFY-SOS study. There is ongoing rolling  
229 enrollment of participants to the SATISFY-SOS study, and information on patients is continuously being  
230 collected, updated and stored in a SQL Server database (Microsoft®, Redmond, WA) hosted by the Institute of  
231 Quality Improvement, Research and Informatics at Washington University.

232  
233  
234 Figure 2: Flow diagram showing design overview for ENGAGES study

235  
236 Study Subjects

237 This study proposes to enroll 1,232 patients who are already enrolled in the SATISFY-SOS study. Patients 60  
238 years old and older, who are competent to provide informed consent and who are undergoing major elective  
239 surgery under general anesthesia with a potent volatile anesthetic agent that requires a minimum stay of 2  
240 days postoperatively (e.g., open cardiac surgery, open thoracic surgery, major vascular surgery, intra-  
241 abdominal surgery, open gynecologic surgery, open urologic surgery, major orthopedic surgery, open hepato-  
242 biliary surgery and major ear, nose and throat surgery) will be eligible for inclusion. As there are no absolute  
243 contraindications to EEG monitoring, the ENGAGES study is designed as a practical trial that will have minimal  
244 exclusions and therefore maximum applicability. Neurosurgical procedures will be excluded as surgery on the  
245 brain can confound the outcome (postoperative delirium). We will also exclude patients with preoperative  
246 delirium and patients who are unable to participate adequately in delirium screening including those who are  
247 blind, deaf, or illiterate or not fluent in English. Patients with a history of intraoperative awareness during  
248 intended general anesthesia will also be excluded.<sup>53</sup> Patients will be excluded if, prior to their index surgery, a  
249 second surgery is planned to occur within five days after the index surgery. Figure 3 outlines the flow of  
250 participants in the ENGAGES study.

251  
252 Figure 3: Flow of participants

253  
254  
255 Recruitment

256 All consented patients will provide written informed consent for the study. Subjects will often be recruited  
257 through the CPAP clinic at Barnes Jewish Hospital, St. Louis, MO. The majority of adults undergoing surgery at  
258 Barnes-Jewish Hospital, about 30,000 patients per year, are evaluated at CPAP. This clinic is staffed by  
259 anesthesiologists specializing in perioperative medicine and nurses who aim to evaluate each surgical patient's  
260 perioperative risks. On average, the time frame between study enrollment at the CPAP clinic and elective  
261 surgery will be one week. Surgical patients might also be enrolled on hospital wards prior to their surgery.

262 After the research team has established the reliability of the delirium assessments, 100 patients will be enrolled

264 to the pilot phase of the ENGAGES trial during the first year. In years 2-4 an accrual rate of 300 to 400 patients  
265 per year is anticipated. To maximize efficiency, data from the pilot will be included in the main study.<sup>54</sup> In this  
266 pilot cohort, practical aspects of the trial's conduct will be evaluated. These include the feasibility of enrolling  
267 adequate numbers of patients in the preoperative assessment clinic; the ability of researchers to conduct the  
268 baseline preoperative assessments; the demonstration of retrieval of complete perioperative data (including  
269 repeated measures of EEG-derived parameters) from the electronic medical record; successful daily  
270 postoperative delirium assessments until postoperative day 5 or hospital discharge; for patients that remain  
271 delirious at day 5 they will be assessed until they return to baseline or until postoperative day 10, and near  
272 complete (>80%) 30-day patient reported outcomes data.

273  
274 Based on data from previous large clinical trials completed at our site, we expect the study population to be  
275 largely gender-balanced and representative of our environs. In two of our previous studies, we enrolled 6,700  
276 patients in St. Louis, Missouri. Results showed slightly higher enrollment of males versus females (55% vs.  
277 45%), and racial demographics of approximately 80% white and 20% black or other.<sup>40,41</sup> These results are  
278 generally representative of the population in metropolitan St. Louis and surrounding regions where the majority  
279 of our patients reside. Based on 2011 census data, median household income and education levels of the  
280 population of St. Louis metropolis are representative of the national average. The ENGAGES Study will enroll  
281 patients older than 60. Older patients constitute a vulnerable population and have often been under-  
282 represented in clinical research. We anticipate that the patients enrolled in the ENGAGES Study will be broadly  
283 representative of the older adult population of the United States, recognizing that certain demographics (e.g.  
284 Hispanic) are under-represented in St. Louis. The follow-up period after randomization is approximately 1 year.

#### 285 Randomization and Blinding

286 Randomization will be performed at the patient level using computer-generated assignment. Eligible patients  
287 who provided written informed consent will be randomized to receive the intraoperative  
288 electroencephalography-guided protocol or routine care. In order to ensure that there is not major imbalance  
289 between group assignments with respect to history of falls and cardiac surgery, subjects will be randomized  
290 (1:1) between the EEG-guided and routine care groups in blocks of 20 within these four strata (i.e., cardiac  
291 surgery with a history of falls within 6 months, cardiac surgery without a history of falls within 6 months, non-  
292 cardiac surgery with a history of falls within 6 months; and non-cardiac surgery without a history of falls within 6  
293 months). Trained members of the research team will enroll participants and will implement the assignment of  
294 participants to the EEG-guided or usual care protocols. Group assignment will be revealed to members of the  
295 anesthetic team only when the patient enters the operating room by opening a sequentially numbered, opaque,  
296 sealed envelope in a sequence generated by one of the study's data analysts. Patients and their families will  
297 be blinded to group allocation and different members of the research team will assist with the intervention in  
298 the operating room (will not be blinded to the intervention) from those conducting the postoperative  
299 assessments (will be blinded to the intervention).<sup>51,52</sup> To reduce predictability of a random sequence, details of  
300 patients already randomized and prior group assignments will be recorded in a separate document that is  
301 unavailable to those who enroll participants and assign interventions.

#### 303 Primary Intervention – EEG-guided Anesthetic Protocol

304 The primary intervention to which patients will be randomized in this study is a pragmatic EEG-guided  
305 anesthetic protocol (See Appendix). All anesthesia practitioners will receive a targeted educational session on  
306 recognition of EEG patterns typically occurring during general anesthesia. The content will be similar to that  
307 described in an article where we demonstrated that anesthesiologists could estimate BIS (processed EEG  
308 index) values fairly accurately based on clinical context and examination of the raw EEG waveform.<sup>55</sup> The  
309 Bispectral Index proprietary processed EEG monitor will be used for the ENGAGES study. However, the  
310 anesthesia monitor in the operating room will be configured to display, in addition to the processed EEG index,  
311 the raw EEG waveform as well as non-proprietary EEG-derived numerical values, including the burst  
312 suppression ratio and the spectral edge frequency. (Figure 4) The hypothesis motivating this study is that  
313 avoidance of EEG burst suppression during anesthesia can prevent postoperative delirium (Aim 1 in Figure 2)  
314 and its downstream consequences (Aim 2 in Figure 2). Therefore, practitioners will specifically be instructed to  
315 regularly inspect the EEG waveform for evidence of burst suppression, which is easily recognized (See Figure

316 1). The occurrence of burst suppression is the chief trigger for decreasing anesthetic administration in this  
317 protocol. An audible low-BIS alarm will be set at a threshold of 40, as there is an increased likelihood of epochs  
318 of EEG burst suppression below this value.<sup>45</sup> BIS values less than 40 will be a secondary trigger for decreasing  
319 anesthetic administration. Importantly, the EEG-guided protocol is suggestive rather than prescriptive.  
320 Clinicians should exercise judgment and might intentionally deviate from the protocol depending on the clinical  
321 situation. In both groups there will be an audible alarm for low volatile anesthetic agent (at 0.3 minimum  
322 alveolar concentration or at the clinician's discretion), which is standard practice at our institution to prevent  
323 intraoperative awareness. BIS EEG sensors will also be applied to patients in the control group for the purpose  
324 of data comparisons between groups, but when a patient is assigned to the control arm, practitioners will be  
325 blinded to all the EEG and BIS parameters, and will only see the signal quality index (SQI) of the EEG  
326 montage (Figure 5). EEG monitoring may continue to be acquired via continuous recordings of EEG, eye  
327 movements, and chin muscle activity for patients that are admitted to the ICU and step-down wards, or if the  
328 hospital room allows. Patients and research assistants assessing the study outcome measures (e.g., delirium  
329 assessments) will be blinded to the allocated intervention.  
330

331

332 Figure 4: The anesthesia monitor is configured for the EEG-guided arm such that the raw  
333 electroencephalograph (EEG) waveform as well as the non-proprietary numerical values are displayed by the  
334 monitor, including the burst suppression ratio (SR) and the spectral edge frequency (SEF). The EEG filter is  
335 turned off so the low frequency slow delta waves (with a frequency of about 0.5 Hz.) are clearly visible. Turning  
336 off the filter allows EEG waves <2 Hz to be seen. The filter is a bandpass filter from 2 Hz to 70 Hz with a notch  
337 to eliminate 60 Hz alternating current electrical noise. With the filter off, the system has a bandwidth of  
338 approximately 0.25 Hz to 100 Hz.  
339

340

341 Figure 5: The anesthesia monitor is configured for the control arm such all the EEG and BIS parameters are  
342 hidden, and only the signal quality index (SQI) of the EEG montage is visible.



343  
344 *Ensure practitioner fidelity to the EEG-guided protocol*

345 In order for any monitor to alter clinical practice, clinicians must be able to glean useful information from the  
346 monitor and should be motivated to make decisions based on that information. One of the limitations regarding  
347 EEG guidance of anesthesia is that teaching on electroencephalography is currently limited in both  
348 anesthesiology residencies and in nurse anesthesia training programs. Given this, it is unsurprising that EEG-  
349 based monitors have not been incorporated into routine anesthetic practice. Our research group published a  
350 study showing that with a focused training session, anesthesiologists could learn to appreciate some of the key  
351 EEG changes that occur with general anesthesia.<sup>55</sup> We demonstrated that clinicians could learn relatively  
352 rapidly to integrate clinical context with EEG waveform information and could even accurately estimate BIS  
353 values – an index derived via computer-based processing of the raw EEG signal.<sup>55</sup> With initiation of the  
354 ENGAGES study, we launched a training module on a non-profit international educational website,  
355 International Consortium for Electroencephalograph Training of Anesthesia Practitioners ([www.icetap.org](http://www.icetap.org)),  
356 titled “EEG Waveforms and Depth of Anesthesia”.<sup>56</sup> Key to the success of the ENGAGES study will be  
357 educating anesthesia practitioners at our institution about the EEG waveform and how information from the  
358 EEG can be useful in guiding anesthetic practice. Regarding EEG-derived parameters specifically, we capture  
359 electronically both proprietary (e.g., BIS values) and non-proprietary (e.g., burst suppression ratio) data.  
360 Therefore, we shall be able to ascertain from the phase 1 pilot study of 100 patients whether or not the EEG-  
361 guided protocol alters anesthetic administration (e.g., measured concentrations of volatile anesthetic agents) or  
362 EEG parameters (e.g., cumulative duration of EEG burst suppression). Given that the hypothesis of the  
363 ENGAGES study is that EEG guidance in the real world can alter anesthetic management, which in turn  
364 prevents postoperative delirium, an essential proof of concept step in the pilot phase is to demonstrate our  
365 ability to alter anesthetic practice in a range of practitioners when they utilize the EEG-guided protocol.  
366

367 *Secondary Intervention – Multi-Component Safety Intervention*

368 Based on findings that multi-component non-pharmacological protocols can improve sleep, decrease episodes  
369 of delirium, and improve outcomes,<sup>20,57,58</sup> the ENGAGES study will implement a multi-component intervention  
370 including principles from the Hospital Elder Life Program<sup>59,60</sup> for all patients enrolled in the study to attempt to  
371 prevent post-discharge falls and decrements in health-related quality of life.<sup>20,57,58,61</sup> These outcomes will be  
372 tracked in all patients in the ENGAGES study as they will also be enrolled in the SATISFY-SOS study.  
373 Likewise, these outcomes will be ascertained in a matched cohort of controls from the SATISFY-SOS cohort  
374 who will not be enrolled in the ENGAGES study. This will allow comparison in these outcomes between  
375 patients receiving the multi-component safety intervention and matched controls (Aim 3 in Figure 2). The  
376 interventions, implemented mainly after hospital discharge, will include the following, as indicated: reduction of  
377 psychoactive drugs; advice on non-pharmacological approaches to manage sleep, anxiety, and agitation;  
378 involvement of family members in care, particularly for reorientation and prevention of self-harm;  
379 encouragement of mobility and self-care; ensuring that, if needed, patients have glasses, hearing aids, and  
380 dentures; home visits by occupational therapists; targeted home safety modifications; keeping patients  
381 involved in their care; and communicating regularly with patients and their families.<sup>20</sup> During the pilot phase,  
382 patients and their family members will be called and questioned about their perception of the utility of the  
383 educational resources and, if relevant, the home visit.

384 Preoperatively, at the time of providing informed consent for the ENGAGES study (but prior to randomization  
385 for the primary intervention), all participants and their families will receive general information on delirium and  
386 falls derived from the Hospital Elder Life Program<sup>59,60</sup> and from the Agency for Healthcare and Research  
387 Quality-Rand (AHRQ-Rand) hospital fall prevention program.<sup>62</sup> The research team will provide participants and  
388 their families with information about making the home environment safer to decrease the risk of falls and  
389 related injuries. An information sheet on improving safety in the hospital after surgery will also be provided  
390 (Appendices: See CDC Fall Safety Information Sheet and Partners HealthCare Falls T.I.P.S.: Tips to Avoid  
391 Falls While in the Hospital). Postoperatively, prior to hospital discharge, the research staff will review  
392 participants' current medications and provide recommendations regarding any medications with the potential to  
393 increase the risk of falls.<sup>63-69</sup> We will provide participants' physicians with information about any identified  
394 medications associated with fall or delirium risk (e.g., strong centrally-acting anticholinergics, benzodiazepines)  
395

396 and recommendations.<sup>70</sup> Many of these targeted medications were highlighted in the recent American Geriatric  
397 Society Beers Criteria guidelines as potentially inappropriate medications for older persons.<sup>70</sup>  
398

399 Because a history of falls in older adults is associated with increased fall risk<sup>71</sup> the research staff may  
400 recommend and provide (if acceptable to patients and if patients live <45 miles from the hospital) home  
401 occupational therapy visits that have the general aim of improving daily activity performance/safety and  
402 prevention of falls. Because delirium in older adults is associated with increased fall risk<sup>72-76</sup> the research staff  
403 will recommend that patients' families exercise increased vigilance when delirium features are noted in the  
404 hospital or after hospital discharge. Patients and their families will also be reminded about the home safety  
405 assessment tool that they received at the time of enrollment (Appendix: See CDC Fall Safety Information  
406 Sheet).  
407

#### 408 **Data Collection**

409 Baseline assessment will take place at the CPAP clinic and include demographic information, a detailed  
410 medical history, physical examination, assessment of preoperative quality of life, and evaluation of falls history.  
411 Delirium will be assessed daily in the postoperative period of the hospital stay. Data collected specifically for  
412 the ENGAGES study, such as the daily delirium assessments, will be entered into the Washington University  
413 School of Medicine Research Electronic Data Capture (REDCap) application.<sup>77</sup> In the ENGAGES study, EEG  
414 data (including BIS values and EEG burst suppression durations) will be collected in the intervention group as  
415 well as in the blinded control group.<sup>36,50</sup> Furthermore, perioperative data (including repeated measures data)  
416 will be retrieved from the hospital's perioperative electronic medical record (Metavision by iMDsoft®, Needham,  
417 MA).<sup>36,41,53,78</sup> We are able routinely to capture high fidelity perioperative data from our MetaVision to an SQL  
418 server (Microsoft, Redmond, WA) database. Routinely acquired data include detailed patient medical history,  
419 surgical history, specific patient risk factors, medications, Barthel Index, VR-12 quality of life data, Short  
420 Blessed Test, sleep apnea screening, laboratory data, intraoperative medications, physiological readings, and  
421 postoperative recovery parameters. Olfaction might be assessed preoperatively with the Brief Smell  
422 Identification Test, as hyposmia has been identified as a risk factor for postoperative delirium.<sup>79</sup> All the data for  
423 SATISFY-SOS are integrated from various data sources and are stored in a single data repository housed in  
424 the Department of Anesthesiology at Washington University.  
425  
426

#### 427 **Cognitive Testing**

428 When patients are assessed for delirium, structured cognitive appraisal is performed, which gives the  
429 interviewer an opportunity to make observations that are used when scoring the CAM. In addition, as part of  
430 the routine preoperative assessment, patients will be screened for cognitive impairment with the AD-8  
431 dementia screen<sup>80</sup> and with the Short Blessed Test.<sup>81</sup> Tests from the cognitive battery of the NIH toolbox might  
432 also be incorporated in the baseline assessment.<sup>82,83</sup> This computer based battery assesses Executive  
433 Function, Attention, Episodic Memory, Language, Processing Speed and Working Memory (See Appendix).  
434 Depending on time constraints, patients might complete a long form of the cognitive battery or a version  
435 focused on executive function, episodic memory and attention. Patients who prefer not to do computer based  
436 cognitive tests will be offered paper based cognitive tests (Trails A and B, and Stroop Color and Word Test).  
437 Impaired performance on preoperative cognitive tests is reportedly associated with postoperative delirium<sup>84,85</sup>,  
438 and postoperative delirium has been found to be associated with persistent postoperative cognitive decline.<sup>18</sup>  
439 Therefore, when patients are followed up postoperatively at thirty days, the Short Blessed Test will be  
440 administered on the telephone. When patients are followed up postoperatively at one year, the Short Blessed  
441 Test will be administered on the telephone and, if possible, follow up cognitive assessment with the NIH  
442 toolbox will be arranged. Permission from the NIH has been obtained to use the NIH Toolbox for the  
443 ENGAGES study.  
444

#### 445 **Frailty Assessment**

446 Various components of frailty are assessed routinely in the CPAP clinic and as part of the SATISFY-SOS  
447 study. These include weight loss, Charlson Comorbidity Index, individual co-morbidities, preoperative anemia

448 (hematocrit <35%), functional status, 6 months history of falls and the Barthel Index.<sup>86</sup> In addition to these  
449 measures, for the ENGAGES study we plan to measure grip strength and the Timed Up and Go (TUG) test.<sup>86</sup>  
450 Grip strength will also be assessed with three measurements in the dominant hand using a Jamar® handheld  
451 dynamometer (Lafayette Instruments, Lafayette, IN).<sup>87</sup> Maximal grip strength will be selected for analysis.

#### 453 *Patients' Postoperative Health and Wellbeing*

454 All patients enrolled in the ENGAGES study will already have provided informed consent for the SATISFY-SOS  
455 study. Using the SATISFY-SOS infrastructure, the ENGAGES study will track postoperative patient reported  
456 outcomes at approximately 1 month and at 1 year. Patient reported outcomes tracked include health-related  
457 quality of life and postoperative falls.

#### 459 Outcome Measures

##### 461 *i) Incidence of Postoperative Delirium (Aim 1 in Figure 2)*

462 Incident delirium is the primary outcome of the ENGAGES trial. A preoperative baseline assessment will be  
463 performed when patients are enrolled to participate in the ENGAGES study. Preoperative delirium is rare  
464 before elective surgery and will exclude participation in the study. Postoperative delirium assessments will be  
465 performed when patients can be aroused sufficiently in order to be assessed for delirium (Richmond Agitation-  
466 Sedation Scale (RASS) > -4). Patients will be assessed for delirium once daily in the afternoon / evening. Each  
467 patient will be assessed for delirium up to postoperative day 5; for patients that remain delirious at day 5 they  
468 will be assessed until they return to baseline or until postoperative day 10, postoperative delirium typically first  
469 manifests 24-96 hours after surgery. Delirium will be diagnosed based on a combined approach consisting of  
470 standardized daily Confusion Assessment Method (CAM) evaluations coupled with structured chart review.  
471 The CAM has been described as a viable tool to be used by non-psychiatrists for delirium detection.<sup>21</sup> It has  
472 subsequently been validated in numerous studies, and has a sensitivity of >94% and a specificity of >89%  
473 against a reference standard.<sup>88</sup> Trained research team members who are blinded to treatment allocation will  
474 assess patients for incident delirium (primary outcome) using the Confusion Assessment Method (CAM).<sup>21</sup>  
475 Patients who are unable to speak (e.g., have a tracheal tube or tracheostomy) will instead be assessed using  
476 the Confusion Assessment Method for the Intensive Care Unit (CAM-ICU) instrument.<sup>89,90</sup> Both of these  
477 methods (the CAM and the CAM-ICU) have been shown to be reliable and to have good agreement with the  
478 DSM-IV criteria for delirium.<sup>90-92</sup> In addition to the CAM or the CAM-ICU, an independent trained clinical  
479 researcher, blinded to the CAM results, will conduct structured chart reviews to detect episodes of delirium. A  
480 combined approach (CAM interview or CAM-ICU plus chart review) increases the sensitivity and retains  
481 specificity in detecting incident delirium.<sup>93,94</sup> Therefore, either a positive clinical delirium assessment (CAM or  
482 CAM-ICU) or a positive assessment for delirium based on a validated, structured chart review<sup>93,94</sup> will be  
483 diagnostic of incident delirium in the ENGAGES trial. The use of the structured chart review will both improve  
484 sensitive and contribute to the pragmatic aspects of this trial, since it will abstract incident delirium from a  
485 routinely available source. The trial staff will undergo training on the chart review methodology by a skilled  
486 chart reviewer under the supervision of Drs. Inouye and Schmitt.

488 The CAM assessment that will be used in the ENGAGES study was developed by Dr. Inouye and colleagues.<sup>21</sup>  
489 All ENGAGES CAM assessments will be performed by study team members who have undergone a rigorous  
490 training process. Several members of the research team participated in a full-day CAM training program led by  
491 Dr. Inouye, the original creator of the instrument.<sup>95</sup> Those who attended this initial training will oversee the  
492 training of other team members. All trainees must demonstrate competence at conducting the structured  
493 interviews and in correctly scoring subjects. Trainees must first conduct at least two satisfactory CAM  
494 assessments in subjects not enrolled in the ENGAGES study in the presence of a trained team member. To  
495 establish competency in scoring the CAM, trainees will observe CAM interviews conducted by trained team  
496 members and will score the CAM independently. The trainee must agree with the trainer on the presence or  
497 absence of all twelve cognitive features assessed by the CAM on a minimum of two delirious and two non-  
498 delirious patients. After meeting the stipulations of training, the newly trained team member will conduct their  
499 first interview of a patient enrolled into the ENGAGES trial in the presence of a previously trained team  
500 member. Independent of the training process, all ENGAGES team members who are participating in CAM

501 assessments must view and rate nine videos of standard interviews of actors depicting delirious and non-  
502 delirious patients. This process will help to demonstrate the success of the training process and the extent to  
503 which researchers reproducibly score the CAM. To establish the reliability of delirium assessments in the  
504 clinical setting, trained members of the research team will separately assess 30 patients not enrolled in the  
505 ENGAGES study at similar time points (e.g., within two hours of each other). These assessments will  
506 determine the test-retest reliability of delirium assessments by the research team. This approach will provide >  
507 90% power to demonstrate a Kappa statistic of >0.6, representing substantial or greater agreement between  
508 raters.<sup>96</sup>

509 A structured process will be implemented to assess and ensure the quality of the delirium assessments. Every  
510 delirium assessment will be reviewed within three days with a fellow member of the research team to assess  
511 internal consistency of scoring and completeness. On a weekly basis, investigators at Washington University  
512 will review all the delirium assessments, will address methodological inconsistencies, and will attempt to  
513 resolve controversies. Monthly, there will be a teleconference including investigators from Hebrew  
514 SeniorLife/Harvard University and from Washington University to review challenging delirium assessments and  
515 to ensure that the rigor of assessments remains appropriate. During these conferences, the need for focused  
516 and comprehensive refresher training in delirium assessment<sup>95</sup> will be determined.

517 If participants agree, these assessments may be videotaped for training and education of the research team.  
518 The videotapes will include the patients face.

519  
520  
521 *ii) Health-related Quality of Life (Aims 2 and 3 in Figure 2)*

522 As part of the ongoing SATISFY-SOS study, patient self-reported Health-related Quality of Life information will  
523 be assessed through the Veteran's RAND 12-item Health Survey at baseline (preoperatively) and during  
524 follow-up (30-day and 1-year). The VR-12 was derived from the Veterans RAND 36 Item Health Survey (VR-  
525 36) and contains 12 items relating to quality of life, including physical and mental health, as well as specific  
526 questions about functional status. Physical and Mental Health Summary Scores will be calculated. The VR-12  
527 has been validated and is widely applied as a metric for tracking health-related quality of life in the United  
528 States.<sup>97</sup>

529  
530 *iii) Falls (Aims 2 and 3 in Figure 2)*

531 In the baseline (preoperative) questionnaire for the SATISFY-SOS study, patients are asked to indicate how  
532 many times they fell during the past 6 months and injuries from falls are ascertained. Patients who fell at least  
533 one time during the past six months will be classified as having a previous history of falls. On the 30-day and 1-  
534 year follow-up postoperative questionnaires, patients are asked to indicate whether they have experienced a  
535 fall. Based on this information, we will define two outcomes measures: Falls within 30-days and falls within 1-  
536 year of surgery. Data on number of falls and injurious falls will also be collected. The wording for the falls  
537 questions used in SATISFY-SOS is based on the definition proposed by the Prevention of Falls Network  
538 Europe (ProFaNE); the calculation for severity of fall is based on a standard algorithm.<sup>98-100</sup>

539  
540 *Pre-specified additional analyses and sub-studies*

541 The primary aim of the ENGAGES study is to determine whether an EEG-guided anesthetic protocol can  
542 decrease postoperative delirium and its associated downstream negative sequelae (e.g., decrement in quality  
543 of life, falls). However, it is important that large, randomized trials collect and report data on multiple clinically  
544 relevant outcomes to maximize scientific yield and efficiency. The ENGAGES trial will have the potential to  
545 contribute new information on diagnosis of postoperative delirium, risk factors for postoperative delirium, and  
546 negative outcomes following incident postoperative delirium. The ENGAGES trial will be conducted using the  
547 infrastructure of the ongoing SATISFY-SOS study, which is systematically collecting detailed information on  
548 surgical patients' characteristics, and is tracking their health and well-being up to 5 years postoperatively. The  
549 effect of anesthetic depth on postoperative morbidity and mortality is currently being explored in the 6,500  
550 patient Balanced Anaesthesia Trial.<sup>101,102</sup> Information provided by the ENGAGES study will add to the growing  
551 body of evidence regarding the hypothesized effects of anesthetic depth on surgical outcomes. Prespecified  
552 sub-studies for the ENGAGES trial are elaborated in an addendum at the end of this protocol.

554  
555 Patient Centered Approach

556 Several aspects of the ENGAGES study are patient centered in their conception. There is a community liaison  
557 group that has been actively involved in the design and in the conduct of the study. Important outcomes in the  
558 study are based on patient reported outcomes measures. Both patients and their families are provided with  
559 educational material on delirium, its risk factors and its sequelae. The study also includes patient self-  
560 assessment for delirium and implementation of the validated Family Confusion Assessment Method (FAM-  
561 CAM)<sup>103,104</sup> instrument both in hospital and after hospital discharge. Both of these will be included in pre-  
562 specified sub-studies of the ENGAGES trial (see addendum).  
563

564 Statistical Analyses

565 *i) Effectiveness of EEG-guided anesthesia protocol in reducing incident postoperative delirium compared with*  
566 *usual anesthetic care (Aim 1 in Figure 2)*

567 We will follow the intention-to-treat principle for all analyses. The primary endpoint of our analysis is the  
568 incidence of postoperative delirium as defined previously. The incidence of delirium will be compared between  
569 groups using a chi-square test, and the difference in delirium incidence with 95% confidence intervals will be  
570 calculated. Prespecified exploratory subgroup analyses: we will test for effect modification by known baseline  
571 delirium risk factors (i.e., age [ $<70$  and  $\geq 70$ ], sex, history of falls, and type of surgery [cardiac versus non-  
572 cardiac]).  
573

574 *ii) Effectiveness of EEG-guided anesthesia protocol in improving patient reported outcomes of health-related*  
575 *quality of life and preventing postoperative falls (Aim 2 in Figure 2)*

576 Health-related quality of life

577 Random effects regression models based on PROC MIXED in SAS will be used to compare Physical  
578 Summary Score change over 12 months between the intervention and usual care group by introducing terms  
579 for time, indicator variables for treatment group and time x treatment group interactions with the latter set of  
580 regression coefficients of primary interest. The model will be controlled for baseline health-related quality of life.  
581 Potential confounding factors including age, gender and relevant comorbidities will be evaluated and controlled  
582 for in the model. We will utilize the same analysis approach to evaluate the Mental Summary Scores.

583 The analysis is primarily based on the following model:  $Y_{it} = \alpha + \beta_1 t + \beta_{2A} X_{i1} + \beta_{3A} X_{i1} t + \beta_4 Y_{i0} + e_{it}$  (1)  
584 where  $Y_{it}$  = QOL for subject  $i$  at time  $t$ , where  $t = 0$  for baseline,  $t = 1$  for 12 months.  $X_{i1} = 1$  if  $i$ th subject is in the  
585 intervention group, = 0 otherwise  $e_{it} \sim N(0, \sigma^2)$   $\beta_{3A}$  is the mean difference in Physical Summary Score change  
586 between the intervention and usual care groups. The coefficient  $\beta_{2A}$  allows for mean differences in Physical  
587 Summary Scores between groups at baseline. The coefficient  $\beta_4$  allows the change in Physical Summary  
588 Score to depend on initial level.  
589

590 Postoperative falls

591 Chi square test will be used to compare the incidence of falls at 12-months postoperatively between patients in  
592 the EEG-guided and in the usual care groups.  
593

594 *iii) Explore whether a multi-component safety intervention is associated with improved patient reported health-*  
595 *related quality of life and decreased incidence of postoperative falls (Aim 3 in Figure 2)*

596 We will design a prospective matched cohort study using the ENGAGES participants (received multi-  
597 component safety intervention) and SATISFY-SOS patients who are not enrolled in the ENGAGES study (did  
598 not receive multi-component safety intervention). Participants in the ENGAGES study will be matched with  
599 reference subjects according to preoperative characteristics. Reference subjects will be identified through the  
600 ongoing SATISFY-SOS cohort, and will be matched by age ( $\pm 1$  year), American Society of Anesthesiologists'  
601 physical status (1 to 4), type of surgery (cardiac vs non-cardiac), date of planned surgery ( $\pm 1$  year) and history  
602 of falls (yes or no). Health-related quality of life and fall incidence will be compared between these matched  
603 cohorts at approximately 1 month and 1 year postoperatively.  
604

605 All statistical analyses will be performed using SAS, version 9.4 (SAS Institute, Inc., Cary, North Carolina). All  
606

507 tests will be two-sided and by arbitrary convention<sup>105</sup> will be considered statistically significant at a  $p < 0.05$ , and  
508 all results will be presented with estimates and 95% confidence intervals. However, based on the uncertain  
509 prior probability (plausibility) of the alternative hypothesis<sup>106</sup> (i.e., EEG guidance of anesthesia decreases  
510 postoperative delirium) and concerns raised about lack of reproducibility in science<sup>107,108</sup>, a statistically  
511 significant result with a  $p$  value just  $< 0.05$  should be considered as preliminary, and future studies should be  
512 conducted for corroboration. A more stringent  $p$  value (e.g.,  $p < 0.005$ ) would be required to conclude that  
513 subsequent studies would be very likely to reproduce these results with a  $p$  value  $< 0.05$ .<sup>109</sup> Apart from  
514 statistical significance, the ultimate decision regarding the routine implementation of EEG-guidance of general  
515 anesthesia in preventing postoperative delirium will also depend on the estimated effect size of this  
516 intervention.

#### 518 *Sample Size Calculations*

519 All sample size calculations have been performed using SAS PROC POWER.

##### 520 *i) Decrease in Delirium*

521 Our sample size calculations are based on the anticipated delirium incidence and effect size for our primary  
522 endpoint analysis. Based on results of a previously published meta-analysis of four studies investigating the  
523 use of BIS-guided anesthetic administration, we conservatively assume an incidence of postoperative delirium  
524 in the routine anesthesia care group of 25%.<sup>29</sup> We performed a sample size sensitivity analysis and calculated  
525 different scenarios with different values for the delirium incidence in the intervention arm and corresponding  
526 power (80%, 90%, and 95%). With a two sided alpha  $< 5\%$  and 1,232 patients (616 per arm), the trial will have  
527  $> 95\%$  power to detect an absolute decrease in delirium incidence  $\geq 9\%$ ,  $> 90\%$  power to detect a decrease in  
528 delirium incidence  $\geq 8\%$ , and  $> 80\%$  power to detect a decrease in delirium incidence  $\geq 7\%$ . With a 7% decrease  
529 in delirium incidence, the 95% confidence interval would be approximately 3% to 12%. Even a 3% decrease in  
530 delirium incidence would be clinically important, suggesting that delirium would be prevented in one out of  
531 every 33 at risk patients who received EEG-guidance of general anesthesia.

##### 533 *ii) Health Related Quality of Life*

534 The overall sample size of our study is defined through estimations of the primary outcome (delirium). For  
535 secondary analyses, we assume that  $\sim 80\%$  of our trial population ( $\sim 1,000$  participants) will have completed the  
536 trial and the 1-year follow-up survey. With this sample size of 1,000, we can detect a difference of 0.5 points  
537 (standard deviation of 2.5) in the mean change of Physical Health Score from baseline to 1 year between the  
538 intervention and usual care group with a power of  $> 80\%$  and a two-sided alpha level of  $p < 0.05$ .

##### 540 *iii) Postoperative Falls*

541 This calculation is similarly based on the assumption that  $\sim 80\%$  of our trial population ( $\sim 1,000$  participants) will  
542 have completed the trial and the 1-year follow-up survey. Based on a study that showed a preoperative fall  
543 prevalence of 33% over six months preoperatively in a similar patient population to the ENGAGES trial, we will  
544 conservatively assume an incidence of postoperative falls at 1-year in the routine anesthesia care group of  
545 40%.<sup>110</sup> With a sample size of 1,000, we will have  $> 80\%$  power to detect an absolute risk reduction of 12%  
546 between the EEG-guided and the usual care group at a two-sided alpha level of  $p < 0.05$ .

#### 548 *Analysis of Pragmatic Elements of the ENGAGES Study*

549 According to seven of nine criteria elaborated in the pragmatic-explanatory continuum indicator summary  
550 (PRECIS-2) tool<sup>111</sup>, the ENGAGES trial is designed predominantly as a pragmatic rather than as an  
551 explanatory study (see Figure 6). 1) Regarding eligibility criteria, all surgical patients older than 60 undergoing  
552 major surgical procedures are eligible for the ENGAGES study, regardless of other known risk factors for  
553 delirium. As such, this is broadly representative of a substantial population of older surgical patients. However,  
554 the results would not apply to younger patients or to older patients undergoing non-invasive surgical  
555 procedures. 2) Patients are recruited in usual clinical settings with slightly more effort made over and above  
556 what would be used in the usual care setting to engage with patients. 3) The trial is being conducted in usual  
557 care settings, predominantly in the operating rooms and in hospital wards. 4) Any anesthesia practitioner,  
558 regardless of their background or expertise in EEG monitoring, can apply the EEG-guided protocol. However,  
559 during the first phase of the study, there will be structured education of clinicians to increase their familiarity

560 and comfort with EEG-guidance of anesthesia. We therefore anticipate that practitioner familiarity with EEG will  
561 increase over the course of the study, although only basic knowledge regarding EEG analysis will be needed.  
562 Similarly, any anesthesia practitioner, regardless of their background or expertise, can apply the control  
563 (comparison) protocol. 5) Instructions on how to apply the EEG-guided protocol are flexible, offering  
564 practitioners discretion in deciding how to formulate and apply it. Although clinicians carrying out the EEG-  
565 guided protocol will use their own discretion in managing anesthesia, there is an expectation that less  
566 anesthesia will be administered in the EEG-guided arm and that the cumulative duration of EEG suppression  
567 will be less in the EEG-guided arm. During the first phase of the study, clinician adherence to the EEG-guided  
568 protocol will be evaluated and will partially inform the value of proceeding with the second phase of the study.  
569 Similar to the intervention arm, when patients are randomized to the control arm, anesthesia clinicians will  
570 have leeway to pursue their usual practice with minimal restrictions. There are some limitations in relation to  
571 anesthetic technique (e.g. based on potent volatile anesthetic), however these are consistent with current  
572 practice at our institution and more broadly. 6) For the primary intervention of the ENGAGES trial, participants  
573 will be anesthetized and will have no ability to impact adherence to the intervention. Therefore, this domain  
574 was left blank in the PRECIS-2 determination, as recommended<sup>111</sup>. 7) Patients enrolled to the ENGAGES trial  
575 will be followed with more frequent visits and more extensive data collection than would occur in routine  
576 practice. 8) Incident delirium, the primary outcome of the study, is an objectively measured, clinically  
577 meaningful outcome to the study participants. The outcome can be assessed under usual conditions and  
578 typically does not rely on central adjudication. However, special training in rigorous delirium assessment is  
579 required. It is important to note that the abstraction of information of delirium from the medical records bolsters  
580 the pragmatic aspects of the trial, since this is an information source that is readily available at any hospital. 9)  
581 The analysis of the results will include all patients regardless of clinician compliance with the EEG-guided  
582 protocol (i.e. it will be an "intention-to-treat" analysis). The analysis will attempt to determine whether or not the  
583 EEG-guided protocol prevents postoperative delirium under the usual conditions, with all the noise inherent  
584 therein. Although in most respects the ENGAGES trial was judged to be pragmatic, this appraisal might have  
585 been biased as it was conducted by investigators associated with the study.<sup>112</sup>

589 Figure 6 shows the design elements of the ENGAGES trial that tend to be pragmatic (markers placed towards  
590 the periphery) and elements that tend to be explanatory (markers placed towards the center).<sup>111,113</sup> This figure  
591 was generated from a median determination for each criterion (using a 1 to 5 ordinal scale from explanatory to  
592 pragmatic) from 18 independent raters on the study team. Aside from the intensity of patient follow-up and the  
593 expertise needed to deliver the EEG-guided protocol, the ENGAGES study fulfills the criteria for a pragmatic  
594 clinical trial.<sup>111,112</sup>

#### 596 Strengths and Limitations

597 The ENGAGES study has important strengths. It is largely a pragmatic randomized clinical trial conducted in a  
598 high volume, real world clinical setting that incorporates an easy-to-implement intervention and examines an  
599 outcome that is of tremendous importance to patients, healthcare providers and society. The ENGAGES study  
700 can be conducted efficiently as many components of the proposed study are incorporated into existing  
701 infrastructures and processes at Washington University: 1) enrollment will be integrated into the flow of the  
702 Center for Preoperative Assessment and Planning; 2) the conduct of the study will largely be by  
703 anesthesiologists and certified registered nurse anesthetists in the course of their routine clinical work; and 3)  
704 most of the follow-up data will be obtained from SATISFY-SOS, an ongoing registry study. Randomization can  
705 be implemented easily at the point of patient care, as the anesthesia protocols do not require any lead-in time  
706 or advanced preparation. The study will enroll older patients, who are recognized to be vulnerable and under-  
707 studied in clinical research. This targeted population is especially important to understand and would stand to  
708 benefit significantly from reductions in postoperative delirium and related outcomes. The secondary outcomes  
709 of the study include patient-reported health-related quality of life, which is extremely relevant to patients. The  
710 study is also designed to detect postoperative falls and their potential prevention. The trial will exploit the  
711 extensive SATISFY-SOS prospective patient registry and our highly evolved perioperative electronic medical  
712 record. Most of the data collected for the trial will use existing infrastructure, and additional data will be entered

713 using the REDCap resource that integrates well with our other data repositories. The feasibility of the trial is  
714 enhanced by participation of a multi-disciplinary team of investigators that has now established a track record  
715 of collaboration and completion of major clinical trials. As the intervention is inexpensive and straightforward, if  
716 the results of the study show compelling effectiveness, it will be logistically simple to implement and sustain the  
717 EEG-guided anesthesia protocol at our institution and disseminate it nationally in the United States.  
718

719 The following limitations should be considered. A single clinical trial should seldom be regarded as definitive.  
720 As there is no clear estimate for the prior probability that EEG guidance of anesthesia prevents postoperative  
721 delirium, if the results of this trial do suggest that EEG-guidance of anesthesia might decrease delirium at the  
722 arbitrary statistical threshold of  $p < 0.05$ , it will be necessary to replicate this finding in future studies. On the  
723 other hand, even if the study finds a non-significant (at the arbitrary threshold of  $p > 0.05$ ) decrease in delirium  
724 in the EEG-guided group, it is likely that follow-up studies will be warranted to clarify whether or not there is a  
725 clinically meaningful reduction in delirium with EEG-guidance of anesthesia, and whether there are specific  
726 patient populations that might especially benefit from this intervention. If EEG-guidance of anesthesia can  
727 prevent postoperative delirium, demonstrating its effectiveness will depend on clinicians' adherence to the  
728 protocol. However, the inability to blind clinicians to the trial allocation group is a potential source of bias and  
729 confounding. We are attempting to confirm that clinicians do alter anesthetic management based on the  
730 intervention during the pilot phase of the study. The inclusion of patients in a clinical trial focused on the  
731 prevention of delirium, and the provision of practical educational information to patients and family members  
732 could decrease the incidence of postoperative delirium. Furthermore, if the multi-component intervention is  
733 successful in preventing falls and in improving quality of life, this could curtail our ability to detect an impact of  
734 the EEG-guided anesthetic protocol on these outcomes. In addition to the pragmatic structured chart review,  
735 there are two clinical assessment methods that will be used to diagnose delirium: the CAM-ICU and the CAM.  
736 The CAM-ICU is less sensitive than the CAM, but is the only instrument that has been validated for patients  
737 who are non-verbal (i.e., with a breathing tube or tracheostomy in place). Based on our institutional data, the  
738 vast majority of patients enrolled in the in the study will be extubated within the first two postoperative days.  
739 Therefore, most patients will have delirium assessments with the CAM, which is the more sensitive and  
740 specific instrument. We will also test whether intubation status modifies the result in secondary analysis. The  
741 study design includes a 30-day and a 1-year follow up for patient reported outcomes, and incomplete follow-up  
742 is therefore a potential limitation. Based on our previous B-Unaware and BAG-RECALL studies,<sup>40,41</sup> we are  
743 confident that we can achieve a 30-day follow up rate of  $>90\%$ . In our SATISFY-SOS cohort, the 1-year follow  
744 up has yielded approximately 66% response rate. We have performed sensitivity analysis in our power  
745 calculations and have taken into account this potential attrition in our methods. Furthermore, we plan to  
746 enhance follow-up by using supplementary phone calls from members of the study team. As delirium is a  
747 fluctuating disorder, there is a risk that it can be missed by periodic assessments. We are attempting to  
748 mitigate this by assessing patients for delirium during a time of day (afternoon/evening) when delirium occurs  
749 more commonly. Furthermore, we are incorporating structured chart review, which has been validated as a  
750 complementary approach that increases the detection of delirium.<sup>93,94</sup>

## 751 Potential Benefits, Risks and Alternatives

### 752 *Benefits*

753 If the hypotheses motivating this study are correct, patients who are randomized to receiving EEG-guidance of  
754 anesthesia will have a lower chance of experiencing postoperative delirium and possibly also its downstream  
755 consequences, including quality of life decrement and injurious falls. All the patients enrolled in this study will  
756 potentially benefit from the safety interventions intended to decrease the likelihood of postoperative falls.  
757

### 758 *Risks*

759 The risks associated with this study are low. There is a rare risk of breach of confidentiality. The main risk  
760 attributable to the EEG-guided intervention might be increased risk of intraoperative awareness. This is unlikely  
761 as previous studies that have randomized patients to EEG-guidance have not found an increased incidence of  
762 awareness with EEG-based anesthetic protocols.<sup>40-42</sup> However, limitations of the BIS in detecting awareness in  
763 the presence of neuromuscular blocking agents have recently been highlighted.<sup>114</sup> Titration of anesthesia in the



764 ENGAGES trial is therefore based primarily on the raw EEG waveform and only secondarily on the processed  
765 EEG index. Nonetheless, as a potential safety concern regarding the EEG-guided intervention remains that it  
766 could increase the incidence of intraoperative awareness, this outcome will be tracked postoperatively with a  
767 modified Brice interview<sup>115</sup> conducted within 48 hours of extubation. In addition, questions regarding  
768 intraoperative awareness are also included in the SATISFY-SOS 1-month survey. A data-safety monitoring  
769 committee will review adverse events with the PI and, in consultation with the institutional review board, might  
770 recommend stoppage of the trial if awareness events appear to be increased in the intervention group. As part  
771 of the informed consent process for this study, patients will be informed of the rare risk of awareness. In the  
772 unlikely event that serious side effects occur, they will be documented and will be reported to the human  
773 research protection office and to the study's data safety monitoring board. Participants will not incur any study-  
774 related expenses, nor will they be financially compensated for their participation.

#### 775 *Minimization of Risks and Confidentiality*

776 Necessary protected health information will only be shared with members of the research team. To help  
777 protect confidentiality, research charts will be stored in a locked cabinet inside the locked research office.  
778 Electronic data and demographic information will also be kept in a password-protected electronic database  
779 stored on the departmental network drive only accessible via password-protected departmental computers. A  
780 member of the research team will enter this information. Only code numbers will appear on any data and  
781 documents used for evaluation or statistical analyses. Patients may choose not to participate in this study and  
782 there will be no penalty in terms of the care that they receive.

783  
784  
785 The Division of Biostatistics Informatics Core at Washington University will be used for data processing and  
786 management. Washington University belongs to a consortium of institutional partners that work to maintain a  
787 software toolset and workflow methodology for electronic collection and management of research and clinical  
788 trial data. REDCap (Research Electronic Data Capture) data collection projects rely on a thorough study-  
789 specific data dictionary defined in an iterative self-documenting process by all members of the research team  
790 with planning assistance from the Division of Biostatistics Informatics Core. The iterative development and  
791 testing process result in a well-planned data collection strategy for individual studies. REDCap servers are  
792 securely housed in an on-site limited access data center managed by the Division of Biostatistics at  
793 Washington University. All web-based information transmission is encrypted. The data is all stored on a private,  
794 firewall-protected network. All users are given individual user identifiers and passwords and their access is  
795 restricted on a role-specific basis. REDCap was developed specifically around HIPAA-Security guidelines and  
796 is implemented and maintained according to Washington University guidelines. REDCap currently supports  
797 >500 academic/non-profit consortium partners on six continents and 38,800 research end-users.

#### 798 *Adverse Event Reporting and Safety Monitoring*

799 The research team will monitor the study for adverse events. All serious adverse events (SAEs) will be  
800 reported to the IRB according to IRB stipulations. The monitoring plan for this study is appropriate for the  
801 planned pragmatic trial. We have already conducted three large clinical studies including approximately  
802 28,000 patients, half of whom received general anesthesia with EEG-guidance. There were no adverse events  
803 attributable to EEG-guidance of anesthesia in these studies<sup>40-42</sup>; it is unlikely that there will be adverse events  
804 attributable to EEG-guidance in the ENGAGES study.

805  
806  
807 The ENGAGES has an appropriate data and safety monitoring plan for a low risk clinical trial. There is a  
808 charter to guide the functions of the DSMB, and the DSMB will produce reports in accordance with NIH  
809 guidelines. The DSMB will provide independent oversight of the ENGAGES Clinical Trial, and will review  
810 general conduct of the trial and study data for participant safety.<sup>116</sup> The DSMB is comprised of independent,  
811 multidisciplinary experts who will make recommendations regarding the continuation, modification, or  
812 termination of the trial.<sup>117</sup> The members will have the requisite expertise to examine accumulating data, to  
813 protect the integrity of the clinical experiments to which the patients have consented to participate, and to  
814 assure the regulatory bodies, the public and the NIH that conflicts of interest do not compromise either patient  
815 safety or trial integrity.<sup>118</sup> The DSMB will convene twice annually to review safety events. There will be a  
816 provision for early stoppage for safety concerns, but not for efficacy or for futility.<sup>116</sup> Trials that stop early for

317 benefit show implausibly large treatment effects, particularly when the number of events is small.<sup>119</sup> Truncated  
318 trials have been associated with greater effect sizes than trials not stopped early, independent of the presence  
319 of statistical stopping rules.<sup>120</sup> The members of the DSMB shall have no direct involvement in the conduct of  
320 the ENGAGES study. Neither shall they have financial, proprietary or professional conflicts of interest, which  
321 may affect the impartial, independent decision-making responsibilities of the DSMB.<sup>116,117</sup> All DSMB members  
322 have signed a Conflict of Interest Certification to confirm no conflict exists. There are five people on the DSMB,  
323 in order to optimize performance.<sup>121</sup> The DSMB will be advisory rather than executive on the basis that it is the  
324 ENGAGES study investigators in partnership with the National Institute on Aging who are ultimately  
325 responsible for the conduct of the trial (see Figure 7).<sup>121</sup>

#### 326 Figure 7: ENGAGES trial organization

##### 327 *Premature Study Termination*

328 Patients in the EEG-guided anesthetic group will, on average, receive decreased concentrations of inhaled  
329 anesthetic agents during their surgeries. Reduction of anesthetic administration using simultaneous EEG-  
330 based monitoring of anesthetic depth has been previously described without reports of increased intraoperative  
331 awareness.<sup>27,122</sup> However, it is theoretically plausible that a significantly higher rate of awareness events could  
332 occur in a cohort that on average receives lower anesthetic concentrations. Therefore, we propose comparing  
333 the incidence of intraoperative awareness reports in the EEG-guided and usual care groups. We will  
334 recommend to the DSMB that this occur after 600 patients have been enrolled. A one-tailed comparison will  
335 be used to compare the incidences of awareness in the groups, and consideration should be given to  
336 terminating the study if the EEG-guided cohort has a significantly greater incidence of intraoperative  
337 awareness compared with the standard of care group with a p value <0.05. In making recommendations, the  
338 DSMB could take into consideration the severity of the awareness experiences, including reports of pain,  
339 paralysis and distress.<sup>123</sup> Apart from intraoperative awareness, it is not currently hypothesized that decreased  
340 anesthetic administration is associated with clinically relevant adverse outcomes (e.g. death, myocardial  
341 infarction, stroke). It is possible that decreases anesthetic administration might be associated with  
342 intraoperative patient movement, or with increased intraoperative blood pressure and heart rate. However,  
343 these are surrogate measures with unclear clinical relevance, which should not therefore impact a decision to  
344 terminate the study early.

345 We recommend to the DSMB not performing an interim analysis of delirium rates for any consideration of  
346 termination. Currently available data support the possibility that an EEG-guided anesthetic management to  
347 reduce anesthetic administration might decrease the incidence of postoperative delirium or have no effect on  
348 this outcome.<sup>26-29</sup> Conversely, the possible finding of a higher incidence of delirium in the EEG-guided cohort  
349 would conflict with current evidence. When interpreted in the context of existing evidence, the finding of  
350 significantly disparate incidences of postoperative delirium in a partially completed ENGAGES trial would not  
351 provide a sufficient evidence base to change the standard of practice for anesthetic guidance of these  
352 patients.

##### 353 *Indemnity*

354 Washington University School of Medicine is responsible for any non-negligent damage incurred as a result of  
355 participating in the ENGAGES Trial. The indemnity is renewed on an annual basis. Washington University  
356 School of Medicine assures that it will continue renewal of the indemnity for the duration of the trial.

##### 357 *Ethics and Dissemination*

358 The trial steering committee will be responsible for all major decisions regarding changes to the protocol. The  
359 committee will communicate these changes to the IRB and appropriate parties. The final trial dataset is the  
360 property of the investigative team and shall not be shared without permission from the principal investigator.  
361 Data will be shared with the National Institute on Aging. Dissemination plans include presentations at local,  
362 national and international scientific conferences. Every effort will be made to publish results of the ENGAGES  
363 trial in a peer-reviewed journal. Dissemination of results to study participants and their family members will be  
364 available upon request. Updates and results of the study will be available to the public at [clinicaltrials.gov](http://clinicaltrials.gov).

370  
371 **Addendums**  
372

373 **Pre-Specified Sub-Studies**  
374

375 a) *Duration and Severity of Delirium*

376 In addition to the incidence of delirium (the primary outcome of the ENGAGES study), other outcomes  
377 of interest will be the duration of delirium and the severity of delirium, both of which have been shown to  
378 have prognostic importance.<sup>124-128</sup> The severity of delirium will be scored using the CAM-Severity (CAM-  
379 S) metric, which has specifically been shown to be strongly associated with clinically relevant  
380 outcomes.<sup>128</sup> Delirium will also be assessed postoperatively on the day of surgery, when patients are  
381 sufficiently awake (RASS > -4).  
382

383 b) *Agreements among the FAM-CAM, researchers' delirium assessments and patient perceptions*

384 The ENGAGES study is a patient-centered study. As such, the active involvement of patients and their  
385 families is an important component. The Family Confusion Assessment Method (FAM-CAM) instrument  
386 has previously been shown to have good agreement with the CAM and with DSM-IV diagnostic criteria  
387 in patients with cognitive impairment and in hospitalized patients.<sup>103,104</sup> The utility of the FAM-CAM has  
388 not been established in postoperative patients; however it has been successfully implemented in the  
389 postoperative setting in the ongoing PODCAST clinical trial.<sup>129</sup> Patients will also complete a delirium  
390 self-assessment questionnaire (Appendix). Both the FAM-CAM assessments and the patients' self-  
391 assessments will be compared with the researchers' delirium assessments.  
392

393 c) *Duration or recurrence of delirium after hospital discharge as measured by the FAM-CAM and patient  
394 perceptions*

395 Little is currently known about either duration of delirium or recurrence of delirium after hospital  
396 discharge in postoperative patients. The FAM-CAM and patient self-reports will be used to assess  
397 these outcomes.  
398

399 d) *Clinically relevant outcomes associated with delirium*

900 Delirium incidence, duration and severity have all been shown to be associated with other  
901 (downstream) clinically relevant outcomes, including mortality, length of ICU stay, length of hospital  
902 stay, falls, cognitive decline and functional decline. In the ENGAGES study, these associations will be  
903 explored. The data on downstream outcomes will be obtained from hospital records or from patient  
904 reported outcomes measures that are collected as part of the ongoing SATISFY-SOS study.  
905

906 e) *Comparison of patient-reported and observational pain scores*

907 It is likely that patients with delirium are less able to convey verbally the extent to which they are in  
908 pain.<sup>130</sup> Given that postoperative delirium is common and may relate to uncontrolled pain, this has  
909 important implications for the assessment and treatment of postoperative pain. We plan to compare  
910 patient reported and behavioral pain assessments in both non-delirious and delirious patients.<sup>130</sup> (See  
911 Appendices for pain assessment instruments)  
912

913 f) *Postoperative actigraphy and EEG*

914 Postoperative disturbances in sleep and EEG abnormalities have previously been associated with  
915 postoperative delirium.<sup>131-134</sup> EEG data will be collected from some patients at around the time of  
916 delirium assessments. Patients might also wear actigraphy watches to help distinguish episodes of  
917 sleep from wakefulness in the postoperative period.<sup>135</sup>  
918

919 g) *Relationship between clinical CAM-ICU and rigorous delirium assessments*

920 Routine clinical (i.e. conducted by ICU nursing staff) delirium assessments in the intensive care units  
921 (conducted with the CAM-ICU) will be collected when these are available. Comparison will be made  
922 between these routine clinical assessments and the assessments made by the research team.

023  
024 h) *Association Between Delirium and Patient Outcomes*

025 The ENGAGES study will be evaluate the association between postoperative delirium and patient  
026 reported outcome metrics, including quality of life and falls, up to one year postoperatively.

027  
028 i) *Postoperative outcomes hypothesized to be associated with anesthetic depth*

029 It is likely that patients randomized to the EEG-guided protocol will be exposed to lower concentrations  
030 of anesthetic agents, and on average will not be as deeply anesthetized. There is an ongoing  
031 randomized, clinical trial investigating the effects of depth of anesthesia on a range of outcomes<sup>101,102</sup>,  
032 including death, myocardial infarction, cardiac arrest, pulmonary embolus, stroke, surgical site infection,  
033 ICU length of stay, hospital length of stay, intraoperative awareness, persistent pain and cancer  
034 recurrence. Many of these outcomes are tracked with the SATISFY-SOS study, and will therefore be  
035 reported for patients enrolled in the ENGAGES study.

036  
037 j) *Delirium Prediction Models*

038 It is important to improve our understanding of factors that are associated with an increased incidence  
039 of postoperative delirium or perhaps may even mediate an elevated risk for postoperative delirium.  
040 Previous studies have explored risk factors, usually using logistic regression models.<sup>29,136-148</sup> In a  
041 previous study we used a Bayesian exploratory approach with a stochastic search variable selection  
042 method.<sup>29</sup> The ENGAGES study will rigorously assess a large number of surgical patients for  
043 postoperative delirium, and it will therefore lend itself to further exploration, refinement of risk models  
044 and hypothesis generation. Based on results from previous studies, we will include specific variables in  
045 our analyses. Patient age, demographic, life style and comorbidity information will be assessed at  
046 baseline through a standardized interview in the CPAP clinic. Data on previously described risk factors  
047 for postoperative delirium will be acquired including: history of postoperative delirium, modified  
048 Charlson Comorbidity Index, American Society of Anesthesiologists' Physical Status, functional status,  
049 level of education, olfaction, baseline cognition, depression (using the PHQ-9 questionnaire), indices of  
050 frailty, obstructive sleep apnea, baseline hematocrit, baseline sodium and creatinine, preoperative  
051 psychoactive medications (e.g. opioids, benzodiazepines, sedatives, clonidine), alcohol use, dosages  
052 of perioperative medications (e.g. hypnotic anesthetics, opioids, benzodiazepines, dexmedetomidine),  
053 intraoperative hemodynamic parameters, other physiological parameters, processed EEG indices (e.g.  
054 BIS, burst suppression), vasoactive medications, perioperative blood transfusions, postoperative  
055 mechanical ventilation, postoperative pain (using visual analogue scale and behavioral pain scale),  
056 postoperative sleep deprivation, postoperative medical complications, postoperative shock,  
057 postoperative anemia (hematocrit <30%), postoperative hypoalbuminemia (albumin <3 g/dL),  
058 postoperative temperature, and postoperative sodium concentration.<sup>29,79,136-148</sup>

059  
060 **Collaborations with Other Studies**

061  
062 The ENGAGES study is being conducted in collaboration with complementary trials at the University of  
063 California, San Francisco (UCSF) (NCT01983384) and the University of Manitoba in Winnipeg. Some of the  
064 outcomes will be analyzed considering data from some or all of these studies, as appropriate. In terms of the  
065 practicality of disseminating the EEG-guided protocol in North America and beyond, it will be important to  
066 demonstrate the feasibility and impact of the protocol in multiple sites.

067 **References:**

- 068
- 069 1. Projected Future Growth of the Older Population. (Accessed 2014-01-18, at
- 070 [http://www.aoa.gov/AoARoot/Aging\\_Statistics/future\\_growth/future\\_growth.aspx - age.](http://www.aoa.gov/AoARoot/Aging_Statistics/future_growth/future_growth.aspx-age))
- 071 2. Inpatient Surgery. (Accessed 2014-01-18, at [http://www.cdc.gov/nchs/fastats/insurg.htm.](http://www.cdc.gov/nchs/fastats/insurg.htm))
- 072 3. Whitlock EL, Vannucci A, Avidan MS. Postoperative delirium. *Minerva anesthesiologica*
- 073 2011;77:448-56.
- 074 4. Diagnostic and Statistical Manual of Mental Disorders. Fifth Edition. DSM-5.: American
- 075 Psychiatric Association. ; 2013.
- 076 5. Inouye SK. Delirium in older persons. *The New England journal of medicine* 2006;354:1157-65.
- 077 6. Leslie DL, Marcantonio ER, Zhang Y, Leo-Summers L, Inouye SK. One-year health care costs
- 078 associated with delirium in the elderly population. *Archives of internal medicine* 2008;168:27-32.
- 079 7. Gottesman RF, Grega MA, Bailey MM, et al. Delirium after coronary artery bypass graft
- 080 surgery and late mortality. *Annals of neurology* 2010;67:338-44.
- 081 8. Koster S, Hensens AG, Schuurmans MJ, van der Palen J. Consequences of delirium after
- 082 cardiac operations. *The Annals of thoracic surgery* 2012;93:705-11.
- 083 9. Kat MG, Vreeswijk R, de Jonghe JF, et al. Long-term cognitive outcome of delirium in elderly
- 084 hip surgery patients. A prospective matched controlled study over two and a half years. *Dementia and*
- 085 *geriatric cognitive disorders* 2008;26:1-8.
- 086 10. Bickel H, Gradingner R, Kochs E, Forstl H. High risk of cognitive and functional decline after
- 087 postoperative delirium. A three-year prospective study. *Dementia and geriatric cognitive disorders*
- 088 2008;26:26-31.
- 089 11. Toye C, Matthews A, Hill A, Maher S. Experiences, understandings and support needs of
- 090 family carers of older patients with delirium: a descriptive mixed methods study in a hospital delirium
- 091 unit. *International journal of older people nursing* 2013.
- 092 12. Inouye SK, Rushing JT, Foreman MD, Palmer RM, Pompei P. Does delirium contribute to poor
- 093 hospital outcomes? A three-site epidemiologic study. *Journal of general internal medicine*
- 094 1998;13:234-42.
- 095 13. Marcantonio ER, Flacker JM, Michaels M, Resnick NM. Delirium is independently associated
- 096 with poor functional recovery after hip fracture. *Journal of the American Geriatrics Society*
- 097 2000;48:618-24.
- 098 14. Zhang Z, Pan L, Ni H. Impact of delirium on clinical outcome in critically ill patients: a meta-
- 099 analysis. *General hospital psychiatry* 2013;35:105-11.
- 000 15. O'Keeffe S, Lavan J. The prognostic significance of delirium in older hospital patients. *Journal*
- 001 *of the American Geriatrics Society* 1997;45:174-8.
- 002 16. Witlox J, Eurelings LS, de Jonghe JF, Kalisvaart KJ, Eikelenboom P, van Gool WA. Delirium in
- 003 elderly patients and the risk of postdischarge mortality, institutionalization, and dementia: a meta-
- 004 analysis. *JAMA : the journal of the American Medical Association* 2010;304:443-51.
- 005 17. Cole MG, Ciampi A, Belzile E, Zhong L. Persistent delirium in older hospital patients: a
- 006 systematic review of frequency and prognosis. *Age and ageing* 2009;38:19-26.
- 007 18. Saczynski JS, Marcantonio ER, Quach L, et al. Cognitive trajectories after postoperative
- 008 delirium. *The New England journal of medicine* 2012;367:30-9.
- 009 19. Wacker P, Nunes PV, Cabrita H, Forlenza OV. Post-operative delirium is associated with poor
- 010 cognitive outcome and dementia. *Dementia and geriatric cognitive disorders* 2006;21:221-7.
- 011 20. Inouye SK, Westendorp RG, Saczynski JS. Delirium in elderly people. *Lancet*
- 012 2014;383(9920):911-22.
- 013 21. Inouye SK, van Dyck CH, Alessi CA, Balkin S, Siegal AP, Horwitz RI. Clarifying confusion: the
- 014 confusion assessment method. A new method for detection of delirium. *Annals of internal medicine*
- 015 1990;113:941-8.

- 016 22. Inouye SK, Bogardus ST, Jr., Charpentier PA, et al. A multicomponent intervention to prevent  
017 delirium in hospitalized older patients. *The New England journal of medicine* 1999;340:669-76.
- 018 23. Inouye SK, Baker DI, Fugal P, Bradley EH, Project HD. Dissemination of the hospital elder life  
019 program: implementation, adaptation, and successes. *Journal of the American Geriatrics Society*  
020 2006;54:1492-9.
- 021 24. Fox MT, Sidani S, Persaud M, et al. Acute care for elders components of acute geriatric unit  
022 care: systematic descriptive review. *Journal of the American Geriatrics Society* 2013;61:939-46.
- 023 25. Fox MT, Persaud M, Maimets I, et al. Effectiveness of acute geriatric unit care using acute  
024 care for elders components: a systematic review and meta-analysis. *Journal of the American*  
025 *Geriatrics Society* 2012;60:2237-45.
- 026 26. Sieber FE, Zakriya KJ, Gottschalk A, et al. Sedation depth during spinal anesthesia and the  
027 development of postoperative delirium in elderly patients undergoing hip fracture repair. *Mayo Clin*  
028 *Proc* 2010;85:18-26.
- 029 27. Chan MT, Cheng BC, Lee TM, Gin T, Group CT. BIS-guided anesthesia decreases  
030 postoperative delirium and cognitive decline. *Journal of neurosurgical anesthesiology* 2013;25:33-42.
- 031 28. Radtke FM, Franck M, Lendner J, Kruger S, Wernecke KD, Spies CD. Monitoring depth of  
032 anaesthesia in a randomized trial decreases the rate of postoperative delirium but not postoperative  
033 cognitive dysfunction. *British journal of anaesthesia*. Mar 28 ed: epub ahead of print 28 March; 2013.
- 034 29. Whitlock EL, Torres BA, Lin N, Helsten DL, Nadelson MR, Mashour GA, Avidan MS.  
035 Postoperative Delirium in a Substudy of Cardiothoracic Surgical Patients in the BAG-RECALL Clinical  
036 Trial. *Anesthesia and Analgesia* 2014;118(4):809-17.
- 037 30. Rampil IJ. A primer for EEG signal processing in anesthesia. *Anesthesiology* 1998;89:980-  
038 1002.
- 039 31. Kertai MD, Pal N, Palanca BJ, et al. Association of perioperative risk factors and cumulative  
040 duration of low bispectral index with intermediate-term mortality after cardiac surgery in the B-  
041 Unaware Trial. *Anesthesiology* 2010;112:1116-27.
- 042 32. Kertai MD, Palanca BJ, Pal N, et al. Bispectral index monitoring, duration of bispectral index  
043 below 45, patient risk factors, and intermediate-term mortality after noncardiac surgery in the B-  
044 Unaware Trial. *Anesthesiology* 2011;114:545-56.
- 045 33. Monk TG, Saini V, Weldon BC, Sigl JC. Anesthetic management and one-year mortality after  
046 noncardiac surgery. *Anesth Analg* 2005;100:4-10.
- 047 34. Lindholm ML, Traff S, Granath F, et al. Mortality within 2 years after surgery in relation to low  
048 intraoperative bispectral index values and preexisting malignant disease. *Anesth Analg*  
049 2009;108:508-12.
- 050 35. Leslie K, Myles PS, Forbes A, Chan MT. The effect of bispectral index monitoring on long-term  
051 survival in the B-aware trial. *Anesth Analg* 2010;110:816-22.
- 052 36. Willingham M; Ben Abdallah A GS, Helsten D, Lin N, Villafranca A, Jacobsohn E, Avidan MS,  
053 Kaiser H. The association between intraoperative electroencephalographic suppression and  
054 postoperative mortality. *British journal of anaesthesia* 2014;In Press.
- 055 37. National Clinical Guideline Centre (UK). Depth of anaesthesia monitors – Bispectral Index  
056 (BIS), E-Entropy and Narcotrend-Compact M. London: Royal College of Physicians; 2012.
- 057 38. Pandit JJ, Cook TM. National Institute for Clinical Excellence guidance on measuring depth of  
058 anaesthesia: limitations of EEG-based technology. *British journal of anaesthesia* 2013;110:325-8.
- 059 39. Pandit JJ, Cook TM, Jonker WR, O'Sullivan E, th National Audit Project of the Royal College of  
060 A, the Association of Anaesthetists of Great Britain I. A national survey of anaesthetists (NAP5  
061 baseline) to estimate an annual incidence of accidental awareness during general anaesthesia in the  
062 UK. *British journal of anaesthesia* 2013;110:501-9.
- 063 40. Avidan MS, Zhang L, Burnside BA, et al. Anesthesia awareness and the bispectral index. *The*  
064 *New England journal of medicine* 2008;358:1097-108.

- 065 41. Avidan MS, Jacobsohn E, Glick D, et al. Prevention of intraoperative awareness in a high-risk  
066 surgical population. *The New England journal of medicine* 2011;365:591-600.
- 067 42. Mashour GA, Shanks A, Tremper KK, et al. Prevention of intraoperative awareness with  
068 explicit recall in an unselected surgical population: a randomized comparative effectiveness trial.  
069 *Anesthesiology* 2012;117:717-25.
- 070 43. American Society of Anesthesiologists Task Force on Intraoperative A. Practice advisory for  
071 intraoperative awareness and brain function monitoring: a report by the american society of  
072 anesthesiologists task force on intraoperative awareness. *Anesthesiology* 2006;104:847-64.
- 073 44. Crosby G. General anesthesia--minding the mind during surgery. *The New England journal of*  
074 *medicine* 2011;365:660-1.
- 075 45. Morimoto Y, Hagihira S, Koizumi Y, Ishida K, Matsumoto M, Sakabe T. The relationship  
076 between bispectral index and electroencephalographic parameters during isoflurane anesthesia.  
077 *Anesth Analg* 2004;98:1336-40, table of contents.
- 078 46. Kertai MD, Whitlock EL, Avidan MS. Brain monitoring with electroencephalography and the  
079 electroencephalogram-derived bispectral index during cardiac surgery. *Anesth Analg* 2012;114:533-  
080 46.
- 081 47. Soehle M, Dittmann A, Ellerkmann RK, Baumgarten G, Putensen C, Guenther U.  
082 Intraoperative burst suppression is associated with postoperative delirium following cardiac surgery: a  
083 prospective, observational study. *BMC anesthesiology* 2015;15:61.
- 084 48. Andresen JM, Girard TD, Pandharipande PP, Davidson MA, Ely EW, Watson PL. Burst  
085 suppression on processed electroencephalography as a predictor of postcoma delirium in  
086 mechanically ventilated ICU patients. *Critical care medicine* 2014;42:2244-51.
- 087 49. Watson PL, Shintani AK, Tyson R, Pandharipande PP, Pun BT, Ely EW. Presence of  
088 electroencephalogram burst suppression in sedated, critically ill patients is associated with increased  
089 mortality. *Critical care medicine* 2008;36:3171-7.
- 090 50. Whitlock EL, Villafranca AJ, Lin N, et al. Relationship between bispectral index values and  
091 volatile anesthetic concentrations during the maintenance phase of anesthesia in the B-Unaware trial.  
092 *Anesthesiology* 2011;115:1209-18.
- 093 51. Chan AW, Tetzlaff JM, Altman DG, et al. SPIRIT 2013 statement: defining standard protocol  
094 items for clinical trials. *Annals of internal medicine* 2013;158:200-7.
- 095 52. Chan AW, Tetzlaff JM, Gotzsche PC, et al. SPIRIT 2013 explanation and elaboration:  
096 guidance for protocols of clinical trials. *Bmj* 2013;346:e7586.
- 097 53. Aranake A, Gradwohl S, Ben-Abdallah A, et al. Increased risk of intraoperative awareness in  
098 patients with a history of awareness. *Anesthesiology* 2013;119:1275-83.
- 099 54. Thabane L, Ma J, Chu R, et al. A tutorial on pilot studies: the what, why and how. *BMC Med*  
100 *Res Methodol* 2010;10:1.
- 101 55. Bottros MM, Palanca BJ, Mashour GA, et al. Estimation of the bispectral index by  
102 anesthesiologists: an inverse turing test. *Anesthesiology* 2011;114:1093-101.
- 103 56. ICETAP Electroencephalography Education Website. (Accessed May 31, 2015, at  
104 <http://www.icetap.org/>)
- 105 57. McDowell JA, Mion LC, Lydon TJ, Inouye SK. A nonpharmacologic sleep protocol for  
106 hospitalized older patients. *Journal of the American Geriatrics Society* 1998;46:700-5.
- 107 58. Inouye SK, Bogardus ST, Jr., Williams CS, Leo-Summers L, Agostini JV. The role of  
108 adherence on the effectiveness of nonpharmacologic interventions: evidence from the delirium  
109 prevention trial. *Archives of internal medicine* 2003;163:958-64.
- 110 59. Hospital Elder Life Program: Information About Delirium. (Accessed October 31, 2014, at  
111 <http://www.hospitalelderlifeprogram.org/for-family-members/about-delirium/>)
- 112 60. Hospital Elder Life Program: Advice on Delirium Management. (Accessed October 31, 2014, at  
113 <http://www.hospitalelderlifeprogram.org/for-family-members/what-you-can-do/>)

- 114 61. Lenze EJ, Host HH, Hildebrand MW, et al. Enhanced medical rehabilitation increases therapy  
115 intensity and engagement and improves functional outcomes in postacute rehabilitation of older  
116 adults: a randomized-controlled trial. *Journal of the American Medical Directors Association*  
117 2012;13:708-12.
- 118 62. Ganz DA, Huang C, Saliba D, et al. Preventing falls in hospitals: a toolkit for improving quality  
119 of care. (Prepared by RAND Corporation, Boston University School of Public Health, and ECRI  
120 Institute under Contract No. HHS2902010000171 TO #1.) Rockville, MD: Agency for Healthcare  
121 Research and Quality; January 2013. AHRQ Publication No. 13-0015-EF.
- 122 63. Rhalimi M, Helou R, Jaecker P. Medication use and increased risk of falls in hospitalized  
123 elderly patients: a retrospective, case-control study. *Drugs & aging* 2009;26:847-52.
- 124 64. Masud T, Frost M, Ryg J, et al. Central nervous system medications and falls risk in men aged  
125 60-75 years: the Study on Male Osteoporosis and Aging (SOMA). *Age and ageing* 2013;42:121-4.
- 126 65. Olazaran J, Valle D, Serra JA, Cano P, Muniz R. Psychotropic medications and falls in nursing  
127 homes: a cross-sectional study. *Journal of the American Medical Directors Association* 2013;14:213-7.
- 128 66. van Strien AM, Koek HL, van Marum RJ, Emmelot-Vonk MH. Psychotropic medications,  
129 including short acting benzodiazepines, strongly increase the frequency of falls in elderly. *Maturitas*  
130 2013;74:357-62.
- 131 67. Payne RA, Abel GA, Simpson CR, Maxwell SR. Association between prescribing of  
132 cardiovascular and psychotropic medications and hospital admission for falls or fractures. *Drugs &*  
133 *aging* 2013;30:247-54.
- 134 68. Askari M, Eslami S, Scheffer AC, et al. Different risk-increasing drugs in recurrent versus  
135 single fallers: are recurrent fallers a distinct population? *Drugs & aging* 2013;30:845-51.
- 136 69. Freeland KN, Thompson AN, Zhao Y, Leal JE, Mauldin PD, Moran WP. Medication use and  
137 associated risk of falling in a geriatric outpatient population. *The Annals of pharmacotherapy*  
138 2012;46:1188-92.
- 139 70. American Geriatrics Society Beers Criteria Update Expert P. American Geriatrics Society  
140 updated Beers Criteria for potentially inappropriate medication use in older adults. *Journal of the*  
141 *American Geriatrics Society* 2012;60:616-31.
- 142 71. Carpenter CR, Avidan MS, Wildes T, Stark S, Fowler SA, Lo AX. Predicting geriatric falls  
143 following an episode of emergency department care: a systematic review. *Academic emergency*  
144 *medicine : official journal of the Society for Academic Emergency Medicine* 2014;21:1069-82.
- 145 72. DeCrane SK, Culp KR, Wakefield B. Twelve-month fall outcomes among delirium subtypes.  
146 *Journal for healthcare quality : official publication of the National Association for Healthcare Quality*  
147 2012;34:13-20.
- 148 73. Lakatos BE, Capasso V, Mitchell MT, et al. Falls in the general hospital: association with  
149 delirium, advanced age, and specific surgical procedures. *Psychosomatics* 2009;50:218-26.
- 150 74. Siddiqi N, Young J, House AO, et al. Stop Delirium! A complex intervention to prevent delirium  
151 in care homes: a mixed-methods feasibility study. *Age and ageing* 2011;40:90-8.
- 152 75. Pautex S, Herrmann FR, Zulian GB. Factors associated with falls in patients with cancer  
153 hospitalized for palliative care. *Journal of palliative medicine* 2008;11:878-84.
- 154 76. Mahoney JE, Palta M, Johnson J, et al. Temporal association between hospitalization and rate  
155 of falls after discharge. *Archives of internal medicine* 2000;160:2788-95.
- 156 77. Harris PA, Taylor R, Thielke R, Payne J, Gonzalez N, Conde JG. Research electronic data  
157 capture (REDCap)--a metadata-driven methodology and workflow process for providing translational  
158 research informatics support. *Journal of biomedical informatics* 2009;42:377-81.
- 159 78. Fritz BA, Rao P, Mashour GA, et al. Postoperative recovery with bispectral index versus  
160 anesthetic concentration-guided protocols. *Anesthesiology* 2013;118:1113-22.
- 161 79. Brown CH, Morrissey C, Ono M, et al. Impaired olfaction and risk of delirium or cognitive  
162 decline after cardiac surgery. *Journal of the American Geriatrics Society* 2015;63:16-23.



- 163 80. Galvin JE, Roe CM, Powlishta KK, et al. The AD8: a brief informant interview to detect  
164 dementia. *Neurology* 2005;65:559-64.
- 165 81. Davis PB, Morris JC, Grant E. Brief screening tests versus clinical staging in senile dementia  
166 of the Alzheimer type. *Journal of the American Geriatrics Society* 1990;38:129-35.
- 167 82. Weintraub S, Dikmen SS, Heaton RK, et al. The cognition battery of the NIH toolbox for  
168 assessment of neurological and behavioral function: validation in an adult sample. *Journal of the*  
169 *International Neuropsychological Society : JINS* 2014;20:567-78.
- 170 83. Heaton RK, Akshoomoff N, Tulsy D, et al. Reliability and validity of composite scores from the  
171 NIH Toolbox Cognition Battery in adults. *Journal of the International Neuropsychological Society :*  
172 *JINS* 2014;20:588-98.
- 173 84. Rudolph JL, Jones RN, Grande LJ, et al. Impaired executive function is associated with  
174 delirium after coronary artery bypass graft surgery. *Journal of the American Geriatrics Society*  
175 2006;54:937-41.
- 176 85. Fong TG, Hshieh TT, Wong B, et al. Neuropsychological profiles of an elderly cohort  
177 undergoing elective surgery and the relationship between cognitive performance and delirium.  
178 *Journal of the American Geriatrics Society* 2015;63:977-82.
- 179 86. Amrock LG, Deiner S. The implication of frailty on preoperative risk assessment. *Current*  
180 *opinion in anaesthesiology* 2014;27:330-5.
- 181 87. Abizanda P, Navarro JL, Garcia-Tomas MI, Lopez-Jimenez E, Martinez-Sanchez E, Paterna G.  
182 Validity and usefulness of hand-held dynamometry for measuring muscle strength in community-  
183 dwelling older persons. *Archives of gerontology and geriatrics* 2012;54:21-7.
- 184 88. Wei LA, Fearing MA, Sternberg EJ, Inouye SK. The Confusion Assessment Method: a  
185 systematic review of current usage. *Journal of the American Geriatrics Society* 2008;56:823-30.
- 186 89. Ely EW, Inouye SK, Bernard GR, et al. Delirium in mechanically ventilated patients: validity  
187 and reliability of the confusion assessment method for the intensive care unit (CAM-ICU). *JAMA : the*  
188 *journal of the American Medical Association* 2001;286:2703-10.
- 189 90. Ely EW, Margolin R, Francis J, et al. Evaluation of delirium in critically ill patients: validation of  
190 the Confusion Assessment Method for the Intensive Care Unit (CAM-ICU). *Crit Care Med*  
191 2001;29:1370-9.
- 192 91. Luetz A, Heymann A, Radtke FM, et al. Different assessment tools for intensive care unit  
193 delirium: which score to use? *Crit Care Med* 2010;38:409-18.
- 194 92. Plaschke K, von Haken R, Scholz M, et al. Comparison of the confusion assessment method  
195 for the intensive care unit (CAM-ICU) with the Intensive Care Delirium Screening Checklist (ICDSC)  
196 for delirium in critical care patients gives high agreement rate(s). *Intensive care medicine*  
197 2008;34:431-6.
- 198 93. Inouye SK, Leo-Summers L, Zhang Y, Bogardus ST, Jr., Leslie DL, Agostini JV. A chart-based  
199 method for identification of delirium: validation compared with interviewer ratings using the confusion  
200 assessment method. *Journal of the American Geriatrics Society* 2005;53:312-8.
- 201 94. Saczynski JS, Kosar CM, Xu G, et al. A tale of two methods: chart and interview methods for  
202 identifying delirium. *Journal of the American Geriatrics Society* 2014;62:518-24.
- 203 95. Ramaswamy R, Dix EF, Drew JE, Diamond JJ, Inouye SK, Roehl BJ. Beyond grand rounds: a  
204 comprehensive and sequential intervention to improve identification of delirium. *The Gerontologist*  
205 2011;51:122-31.
- 206 96. Sim J, Wright CC. The kappa statistic in reliability studies: use, interpretation, and sample size  
207 requirements. *Physical therapy* 2005;85:257-68.
- 208 97. Selim AJ, Rogers W, Fleishman JA, et al. Updated U.S. population standard for the Veterans  
209 RAND 12-item Health Survey (VR-12). *Quality of life research : an international journal of quality of*  
210 *life aspects of treatment, care and rehabilitation* 2009;18:43-52.

- 211 98. Lamb SE, Jorstad-Stein EC, Hauer K, Becker C, Prevention of Falls Network E, Outcomes  
212 Consensus G. Development of a common outcome data set for fall injury prevention trials: the  
213 Prevention of Falls Network Europe consensus. *Journal of the American Geriatrics Society*  
214 2005;53:1618-22.
- 215 99. Skelton DA, Todd CJ, ProFa NEG. Prevention of Falls Network Europe: a thematic network  
216 aimed at introducing good practice in effective falls prevention across Europe. Four years on. *Journal*  
217 *of musculoskeletal & neuronal interactions* 2007;7:273-8.
- 218 100. Tinetti ME, Speechley M, Ginter SF. Risk factors for falls among elderly persons living in the  
219 community. *The New England journal of medicine* 1988;319:1701-7.
- 220 101. Short TG, Leslie K, Campbell D, et al. A pilot study for a prospective, randomized, double-blind  
221 trial of the influence of anesthetic depth on long-term outcome. *Anesth Analg* 2014;118:981-6.
- 222 102. Short TG, Leslie K, Chan MT, Campbell D, Frampton C, Myles P. Rationale and Design of the  
223 Balanced Anesthesia Study: A Prospective Randomized Clinical Trial of Two Levels of Anesthetic  
224 Depth on Patient Outcome After Major Surgery. *Anesth Analg* 2015.
- 225 103. Martins S, Conceicao F, Paiva JA, Simoes MR, Fernandes L. Delirium recognition by family:  
226 European portuguese validation study of the family confusion assessment method. *Journal of the*  
227 *American Geriatrics Society* 2014;62:1748-52.
- 228 104. Steis MR, Evans L, Hirschman KB, et al. Screening for delirium using family caregivers:  
229 convergent validity of the Family Confusion Assessment Method and interviewer-rated Confusion  
230 Assessment Method. *Journal of the American Geriatrics Society* 2012;60:2121-6.
- 231 105. Perez ME, Pericchi LR. Changing Statistical Significance with the Amount of Information: The  
232 Adaptive Significance Level. *Statistics & probability letters* 2014;85:20-4.
- 233 106. Nuzzo R. Scientific method: statistical errors. *Nature* 2014;506:150-2.
- 234 107. Ioannidis JP. Why most published research findings are false. *PLoS medicine* 2005;2:e124.
- 235 108. Prasad V, Vandross A, Toomey C, et al. A decade of reversal: an analysis of 146 contradicted  
236 medical practices. *Mayo Clin Proc* 2013;88:790-8.
- 237 109. Johnson VE. Revised standards for statistical evidence. *Proceedings of the National Academy*  
238 *of Sciences of the United States of America* 2013;110:19313-7.
- 239 110. Jones TS, Dunn CL, Wu DS, Cleveland JC, Jr., Kile D, Robinson TN. Relationship between  
240 asking an older adult about falls and surgical outcomes. *JAMA surgery* 2013;148:1132-8.
- 241 111. Loudon K, Treweek S, Sullivan F, Donnan P, Thorpe KE, Zwarenstein M. The PRECIS-2 tool:  
242 designing trials that are fit for purpose. *Bmj* 2015;350:h2147.
- 243 112. Glasgow RE, Gaglio B, Bennett G, et al. Applying the PRECIS criteria to describe three  
244 effectiveness trials of weight loss in obese patients with comorbid conditions. *Health services*  
245 *research* 2012;47:1051-67.
- 246 113. Thorpe KE, Zwarenstein M, Oxman AD, et al. A pragmatic-explanatory continuum indicator  
247 summary (PRECIS): a tool to help trial designers. *Journal of clinical epidemiology* 2009;62:464-75.
- 248 114. Schuller PJ, Newell S, Strickland PA, Barry JJ. Response of bispectral index to neuromuscular  
249 block in awake volunteers. *British journal of anaesthesia* 2015;115 Suppl 1:i95-i103.
- 250 115. Brice DD, Hetherington RR, Utting JE. A simple study of awareness and dreaming during  
251 anaesthesia. *British journal of anaesthesia* 1970;42:535-42.
- 252 116. Tharmanathan P, Calvert M, Hampton J, Freemantle N. The use of interim data and Data  
253 Monitoring Committee recommendations in randomized controlled trial reports: frequency,  
254 implications and potential sources of bias. *BMC Med Res Methodol* 2008;8:12.
- 255 117. Fleming TR, DeMets DL. Monitoring of clinical trials: issues and recommendations. *Control*  
256 *Clin Trials* 1993;14:183-97.
- 257 118. Smith MA, Ungerleider RS, Korn EL, Rubinstein L, Simon R. Role of independent data-  
258 monitoring committees in randomized clinical trials sponsored by the National Cancer Institute. *J Clin*  
259 *Oncol* 1997;15:2736-43.

- 260 119. Montori VM, Devereaux PJ, Adhikari NK, et al. Randomized trials stopped early for benefit: a  
261 systematic review. *JAMA : the journal of the American Medical Association* 2005;294:2203-9.
- 262 120. Bassler D, Briel M, Montori VM, et al. Stopping randomized trials early for benefit and  
263 estimation of treatment effects: systematic review and meta-regression analysis. *JAMA : the journal*  
264 *of the American Medical Association* 2010;303:1180-7.
- 265 121. Grant AM, Altman DG, Babiker AB, et al. Issues in data monitoring and interim analysis of  
266 trials. *Health Technol Assess* 2005;9:1-238, iii-iv.
- 267 122. Myles PS, Leslie K, McNeil J, Forbes A, Chan MT. Bispectral index monitoring to prevent  
268 awareness during anaesthesia: the B-Aware randomised controlled trial. *Lancet* 2004;363:1757-63.
- 269 123. Mashour GA, Esaki RK, Tremper KK, Glick DB, O'Connor M, Avidan MS. A novel classification  
270 instrument for intraoperative awareness events. *Anesth Analg* 2010;110:813-5.
- 271 124. Bellelli G, Mazzola P, Morandi A, et al. Duration of postoperative delirium is an independent  
272 predictor of 6-month mortality in older adults after hip fracture. *Journal of the American Geriatrics*  
273 *Society* 2014;62:1335-40.
- 274 125. Bryczkowski SB, Lopreiato MC, Yonclas PP, Sacca JJ, Mosenthal AC. Delirium prevention  
275 program in the surgical intensive care unit improved the outcomes of older adults. *The Journal of*  
276 *surgical research* 2014;190:280-8.
- 277 126. Morandi A, Rogers BP, Gunther ML, et al. The relationship between delirium duration, white  
278 matter integrity, and cognitive impairment in intensive care unit survivors as determined by diffusion  
279 tensor imaging: the VISIONS prospective cohort magnetic resonance imaging study\*. *Critical care*  
280 *medicine* 2012;40:2182-9.
- 281 127. Gunther ML, Morandi A, Krauskopf E, et al. The association between brain volumes, delirium  
282 duration, and cognitive outcomes in intensive care unit survivors: the VISIONS cohort magnetic  
283 resonance imaging study\*. *Critical care medicine* 2012;40:2022-32.
- 284 128. Inouye SK, Kosar CM, Tommet D, et al. The CAM-S: development and validation of a new  
285 scoring system for delirium severity in 2 cohorts. *Annals of internal medicine* 2014;160:526-33.
- 286 129. Avidan MS, Fritz BA, Maybrier HR, et al. The Prevention of Delirium and Complications  
287 Associated with Surgical Treatments (PODCAST) study: protocol for an international multicentre  
288 randomised controlled trial. *BMJ open* 2014;4:e005651.
- 289 130. Chanques G, Payen JF, Mercier G, et al. Assessing pain in non-intubated critically ill patients  
290 unable to self report: an adaptation of the Behavioral Pain Scale. *Intensive care medicine*  
291 *2009;35:2060-7.*
- 292 131. Jacobson SA, Dwyer PC, Machan JT, Carskadon MA. Quantitative analysis of rest-activity  
293 patterns in elderly postoperative patients with delirium: support for a theory of pathologic wakefulness.  
294 *Journal of clinical sleep medicine : JCSM : official publication of the American Academy of Sleep*  
295 *Medicine* 2008;4:137-42.
- 296 132. van Dellen E, van der Kooi AW, Numan T, et al. Decreased functional connectivity and  
297 disturbed directionality of information flow in the electroencephalography of intensive care unit  
298 patients with delirium after cardiac surgery. *Anesthesiology* 2014;121:328-35.
- 299 133. van der Kooi AW, Zaal IJ, Klijn FA, et al. Delirium detection using EEG: what and how to  
300 measure? *Chest* 2014.
- 301 134. Hofste WJ, Linszen CA, Boezeman EH, Hengeveld JS, Leusink JA, de-Boer A. Delirium and  
302 cognitive disorders after cardiac operations: relationship to pre- and intraoperative quantitative  
303 electroencephalogram. *International journal of clinical monitoring and computing* 1997;14:29-36.
- 304 135. Pollak CP, Tryon WW, Nagaraja H, Dzwonczyk R. How accurately does wrist actigraphy  
305 identify the states of sleep and wakefulness? *Sleep* 2001;24:957-65.
- 306 136. Charlson ME, Pompei P, Ales KL, MacKenzie CR. A new method of classifying prognostic  
307 comorbidity in longitudinal studies: development and validation. *Journal of chronic diseases*  
308 *1987;40:373-83.*

- 309 137. Kocalevent RD, Hinz A, Brahler E. Standardization of the depression screener patient health  
310 questionnaire (PHQ-9) in the general population. *General hospital psychiatry* 2013;35:551-5.
- 311 138. Chanques G, Payen JF, Mercier G, et al. Assessing pain in non-intubated critically ill patients  
312 unable to self report: an adaptation of the Behavioral Pain Scale. *Intensive care medicine*  
313 2009;35:2060-7.
- 314 139. Payen JF, Bru O, Bosson JL, et al. Assessing pain in critically ill sedated patients by using a  
315 behavioral pain scale. *Critical care medicine* 2001;29:2258-63.
- 316 140. Takeuchi M, Takeuchi H, Fujisawa D, et al. Incidence and risk factors of postoperative delirium  
317 in patients with esophageal cancer. *Annals of surgical oncology* 2012;19:3963-70.
- 318 141. Chang YL, Tsai YF, Lin PJ, Chen MC, Liu CY. Prevalence and risk factors for postoperative  
319 delirium in a cardiovascular intensive care unit. *American journal of critical care : an official*  
320 *publication, American Association of Critical-Care Nurses* 2008;17:567-75.
- 321 142. Smulter N, Lingehall HC, Gustafson Y, Olofsson B, Engstrom KG. Delirium after cardiac  
322 surgery: incidence and risk factors. *Interactive cardiovascular and thoracic surgery* 2013;17:790-6.
- 323 143. Guenther U, Theuerkauf N, Frommann I, et al. Predisposing and precipitating factors of  
324 delirium after cardiac surgery: a prospective observational cohort study. *Annals of surgery*  
325 2013;257:1160-7.
- 326 144. Bakker RC, Osse RJ, Tulen JH, Kappetein AP, Bogers AJ. Preoperative and operative  
327 predictors of delirium after cardiac surgery in elderly patients. *European journal of cardio-thoracic*  
328 *surgery : official journal of the European Association for Cardio-thoracic Surgery* 2012;41:544-9.
- 329 145. Rudolph JL, Jones RN, Levkoff SE, et al. Derivation and validation of a preoperative prediction  
330 rule for delirium after cardiac surgery. *Circulation* 2009;119:229-36.
- 331 146. Marcantonio ER, Goldman L, Mangione CM, et al. A clinical prediction rule for delirium after  
332 elective noncardiac surgery. *JAMA : the journal of the American Medical Association* 1994;271:134-9.
- 333 147. Greene NH, Attix DK, Weldon BC, Smith PJ, McDonagh DL, Monk TG. Measures of executive  
334 function and depression identify patients at risk for postoperative delirium. *Anesthesiology*  
335 2009;110:788-95.
- 336 148. Flink BJ, Rivelli SK, Cox EA, et al. Obstructive sleep apnea and incidence of postoperative  
337 delirium after elective knee replacement in the nondemented elderly. *Anesthesiology* 2012;116:788-  
338 96.
- 339
- 340

341  
342  
343  
344  
345  
346  
347  
348  
349  
350  
351  
352  
353  
354  
355  
356  
357  
358  
359  
360  
361  
362  
363  
364  
365  
366  
367  
368  
369

**Authorship Eligibility and Contributorship**

Authorship for this study will be given to key personnel involved in study design, recruitment, data collection, and data analysis. There are no publication restrictions and no professional writers will be involved in the generation of the manuscript. M. Avidan, D. Emmert, K. Escallier, B. Fritz, T. Graetz, R. Huneke, S. Inouye, E. Jacobsohn, E. Lenze, J. Leung, N. Lin, S. Melby, B.J. Palanca, E. Schmitt, S. Stark, T. Stevens, B. Torres, P. Vlisides, T. Wildes, and A. Winter are responsible for conceptualizing study design. S. McKinnon managed patient safety protocol and IRB compliance. H. Maybrier, A. Mickle, M. Muench, M. Murphy, and R. Upadhyayula were responsible for recruitment, enrollment, data collection, and editing the protocol. M. Avidan is responsible for drafting the protocol.

All authors including Avidan, Emmert, Escallier, Fritz, Graetz, Huneke, Inouye, Jacobsohn, Lenze, Leung, Lin, Maybrier, McKinnon, Melby, Mickle, Muench, Murphy, Palanca, Schmitt, Stark, Stevens, Torres, Upadhyayula, Wildes, and Winter have critically revised the ENGAGES protocol and approved the final version. All authors agree to be accountable for the accuracy and integrity of all aspects of the ENGAGES trial.

**Funding**

Funding for the ENGAGES trial was through a UH2/UH3 mechanism grant awarded by the National Institute on Aging (Award Reference Number 1UH2AG050312-01). Funding for the SATISFY-SOS study was from a grant awarded by the Barnes-Jewish Hospital Foundation (Award Reference Number 7937-77) and support provided by the Department of Anesthesiology at Washington University. In addition, resources for this study and the time of Drs. Inouye and Schmitt were covered in part by grants No.P01AG031720, K07AG041835 and R01AG044518.

**Competing Interests**

None of the authors has conflicts of interest to disclose.
