# Supplementary material
Source: PubMed Central journal article supplement (PMC6439616)
Supplement: jama-321-473-s004.pdf [file jama-321-473-s004.pdf]

## Supplementary Online Content

Wildes T, Mickle AM, Ben Abdallah A. Effect of electroencephalography-guided anesthetic administration on postoperative delirium among older adults undergoing major surgery [published February 2, 2019]. *JAMA*. doi:10.1001/jama.2018.22005

### Supplement 4. Data Sharing Statement

This supplementary material has been provided by the authors to give readers additional information about their work.

## **Data Sharing Statement**

### **Data**

**Data available:** Yes

**Data types:** Deidentified participant data, Data dictionary

**How to access data:** avidanm@wustl.edu

**When available:** beginning date: 10-01-2019, end date: 09-30-2024

### **Supporting Documents**

**Document types:** None

### **Additional Information**

**Who can access the data:** Researchers whose proposed use of the data has been approved.

**Types of analyses:** For the aims of achieving said proposal.

**Mechanisms of data availability:** After approval of a proposal with a signed data access agreement.
